# Supplementary material for: Tandem four-component reaction for efficient synthesis of dihydrothiophene with substituted amino acid ethyl esters
Source: Royal Society of Chemistry journal article supplement (doi:10.1039/c8ra03605e), 2018-01-01

**Tandem four-component reaction for efficient synthesis of dihydrothiophene  
with substituted amino acid ethyl esters**

Jing Sun, Yu Zhang, Chao-Guo Yan\*

**Supporting Information**

|                                                                                |             |
|--------------------------------------------------------------------------------|-------------|
| <b>Figures of single crystal structures Fig. s1-s6</b>                         | <b>2-4</b>  |
| <b><sup>1</sup>H NMR, <sup>13</sup>C NMR and HRMS spectra of all compounds</b> | <b>5-68</b> |

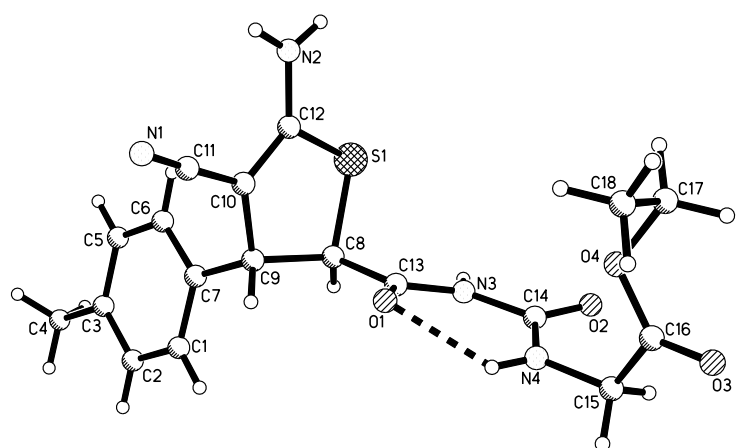

Fig. s1 Crystal structure of the compound **1d**

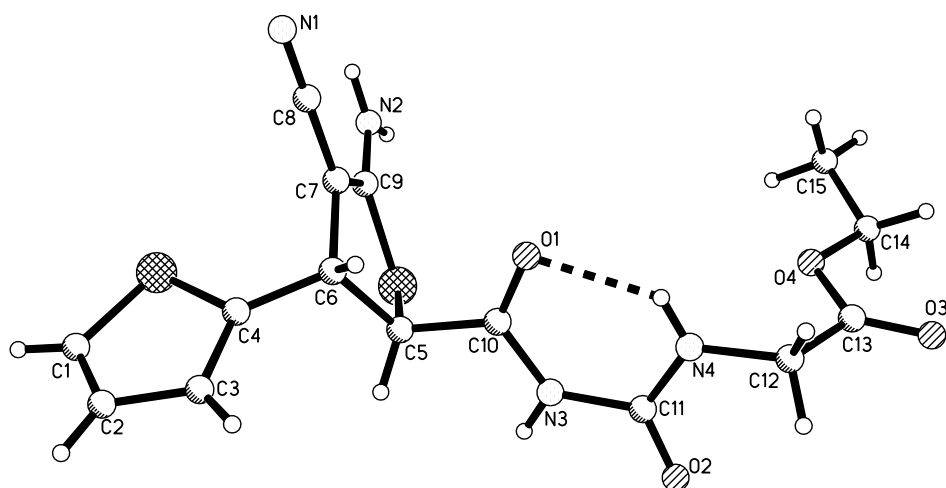

Fig. s2 Crystal structure of the compound **1h**

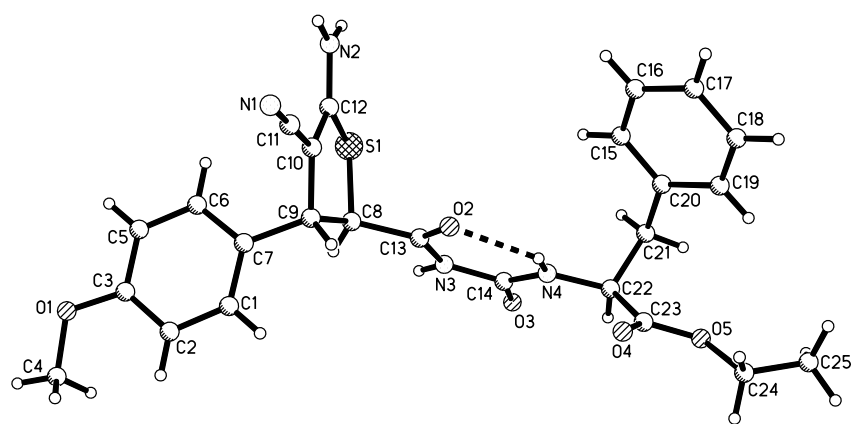

Fig. s3 Crystal structure of the compound **2g**

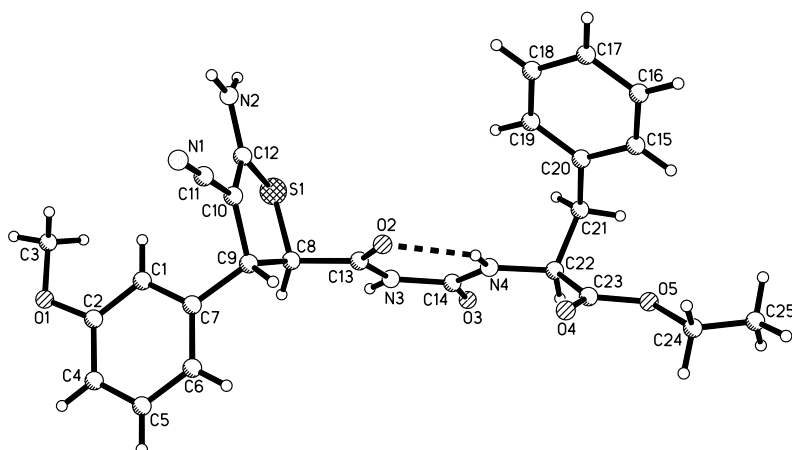

Fig. s4 Crystal structure of the compound **2h**

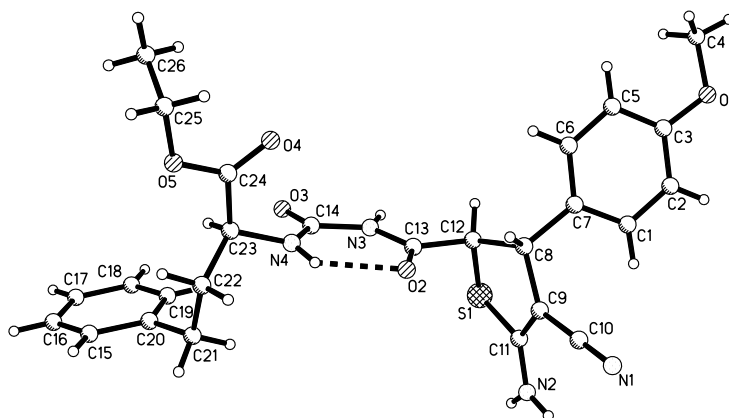

Fig. s5 Crystal structure of the compound **2m**

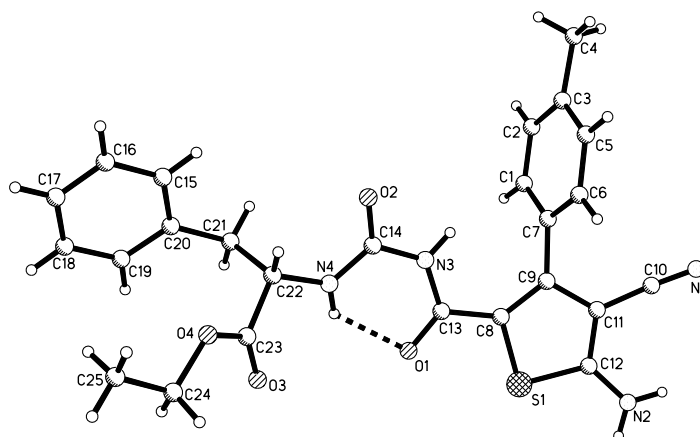

Fig. s6 Crystal structure of the compound **3d**

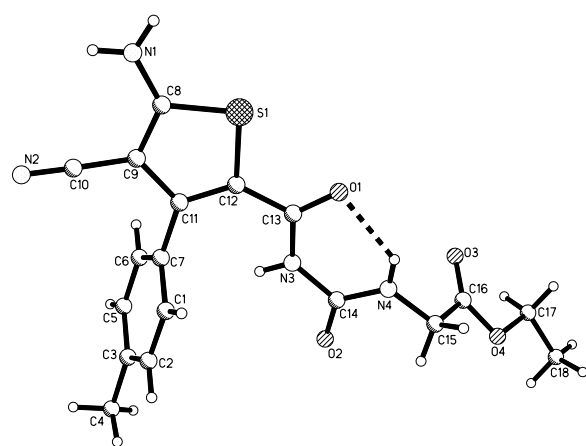

Fig. s7 Crystal structure of the compound **3g**

**Ethyl ((5-amino-4-cyano-3-phenyl-2,3-dihydrothiophene-2-carbonyl)carbamoyl)glycinate**

**(1a)**: yellow solid, 49%, m.p. 188-190°C; <sup>1</sup>H NMR (400 MHz, DMSO-*d*<sub>6</sub>) δ: 10.53 (s, 1H, NH), 8.50 (s, 1H, NH), 7.40-7.36 (m, 2H, ArH), 7.32-7.28 (m, 3H, ArH), 7.20 (s, 2H, NH<sub>2</sub>), 4.57 (d, *J* = 3.2 Hz, 1H, CH), 4.14-4.09 (m, 3H, CH), 3.94 (d, *J* = 6.0 Hz, 2H, CH), 1.20 (t, *J* = 7.2 Hz, 3H, CH<sub>3</sub>); <sup>13</sup>C NMR (100 MHz, DMSO-*d*<sub>6</sub>) δ: 171.9, 170.0, 162.1, 153.5, 141.8, 129.1, 127.9, 127.5, 118.6, 70.7, 61.0, 55.6, 52.0, 41.7, 14.5; IR (KBr) ν: 3408, 3369, 3317, 3193, 3097, 2973, 2204, 1753, 1701, 1654, 1591, 1548, 1415, 1356, 1321, 1248, 1210, 1135, 1019, 977, 856 cm<sup>-1</sup>; MS (*m/z*): HRMS (ESI) Calcd. for C<sub>17</sub>H<sub>18</sub>N<sub>4</sub>O<sub>4</sub>S ([M+Na]<sup>+</sup>): 397.1049, found: 397.0938.

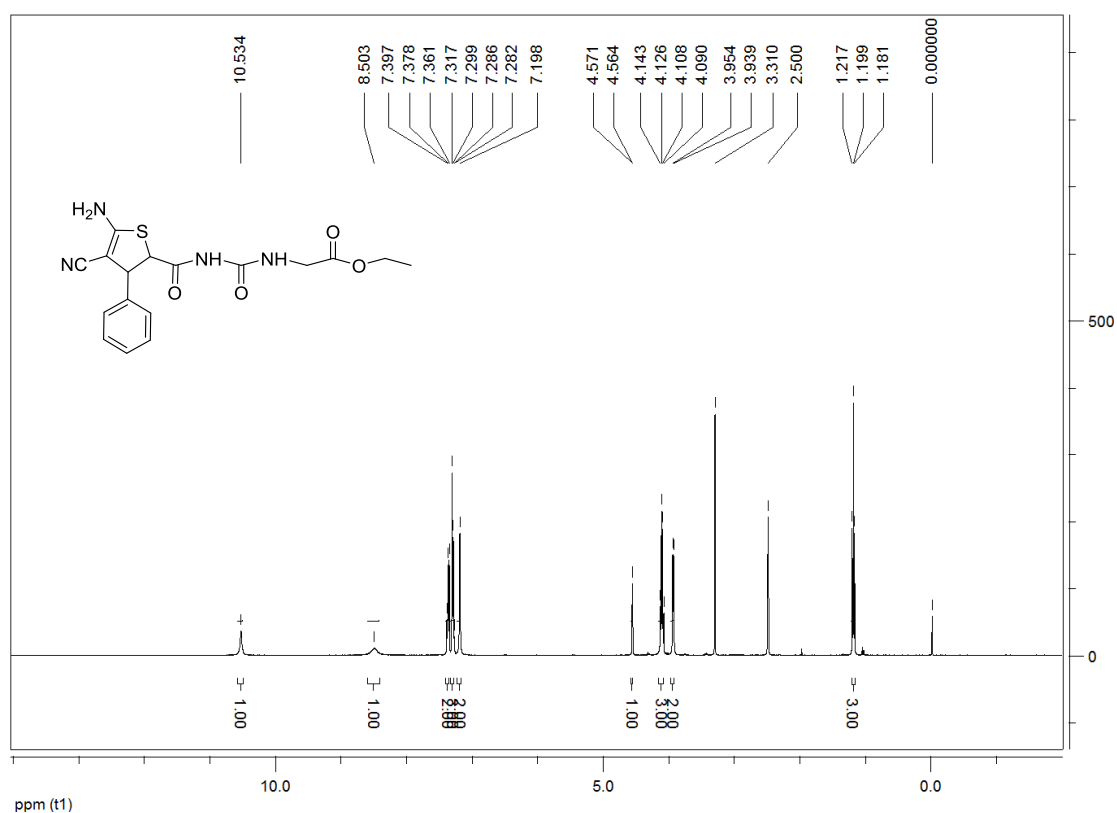

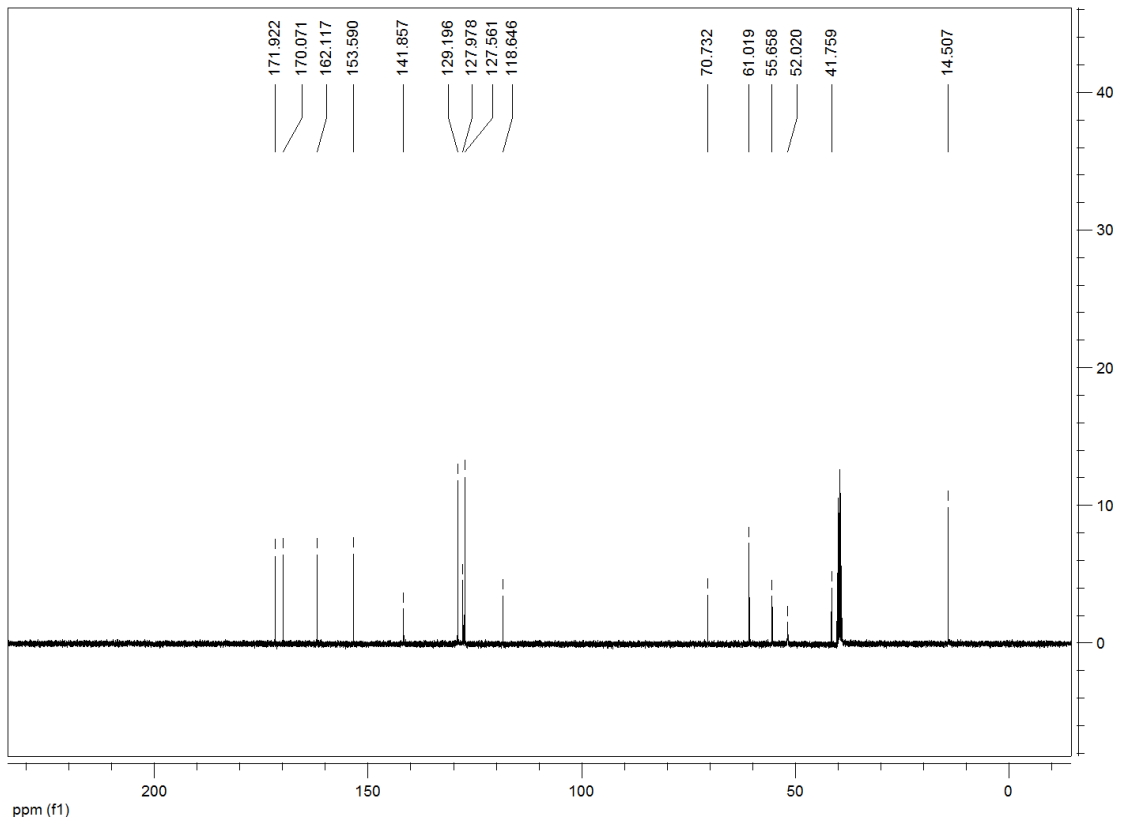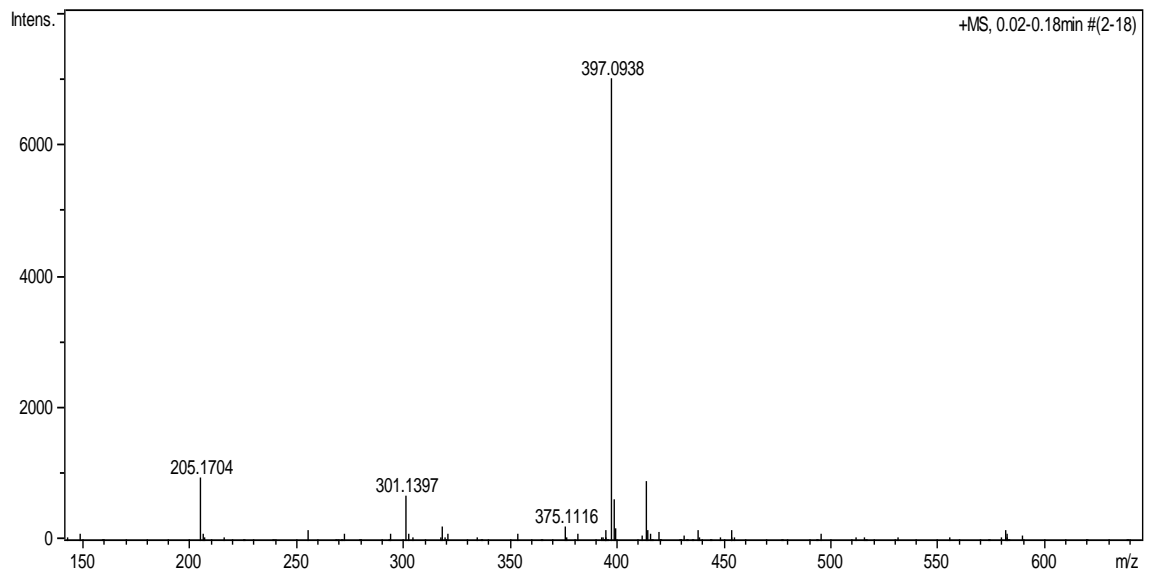

## Ethyl

**((5-amino-4-cyano-3-(4-methoxyphenyl)-2,3-dihydrothiophene-2-carbonyl)carbamoyl)glycinate (1b)**: yellow solid, 65%, m.p. 202-204 °C;  $^1\text{H}$  NMR (400 MHz,  $\text{DMSO-}d_6$ )  $\delta$ : 10.54 (s, 1H, NH), 8.51 (s, 1H, NH), 7.21 (d,  $J = 8.4$  Hz, 2H, ArH), 7.17 (s, 2H,  $\text{NH}_2$ ), 6.93 (d,  $J = 8.4$  Hz, 2H, ArH), 4.52 (d,  $J = 3.2$  Hz, 1H, CH), 4.14-4.08 (m, 3H, CH), 3.94 (d,  $J = 5.6$  Hz, 2H, CH), 3.75 (s, 3H,  $\text{OCH}_3$ ), 1.20 (t,  $J = 7.2$  Hz, 3H,  $\text{CH}_3$ );  $^{13}\text{C}$  NMR (100 MHz,  $\text{DMSO-}d_6$ )  $\delta$ : 171.9, 170.0, 161.7, 159.1, 153.5, 133.6, 128.6, 118.6, 114.5, 71.0, 60.9, 55.8, 55.5, 51.5, 41.7, 14.5; IR (KBr)  $\nu$ : 3442, 3321, 3227, 3160, 2970, 2837, 2176, 1749, 1697, 1629, 1580, 1506, 1352, 1310, 1257, 1187, 1028, 982, 888, 828  $\text{cm}^{-1}$ ; MS ( $m/z$ ): HRMS (ESI) Calcd. for  $\text{C}_{18}\text{H}_{20}\text{N}_4\text{O}_5\text{S}$  ( $[\text{M}+\text{H}]^+$ ): 405.1154, found: 405.1236.

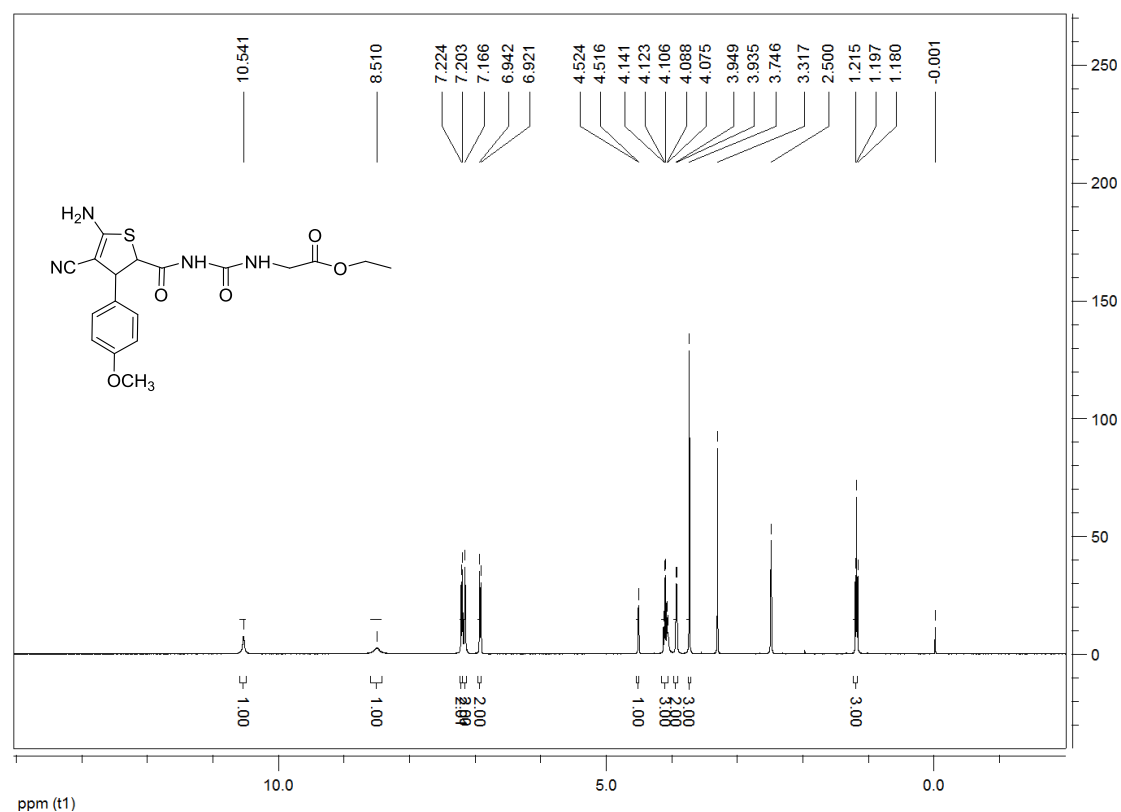

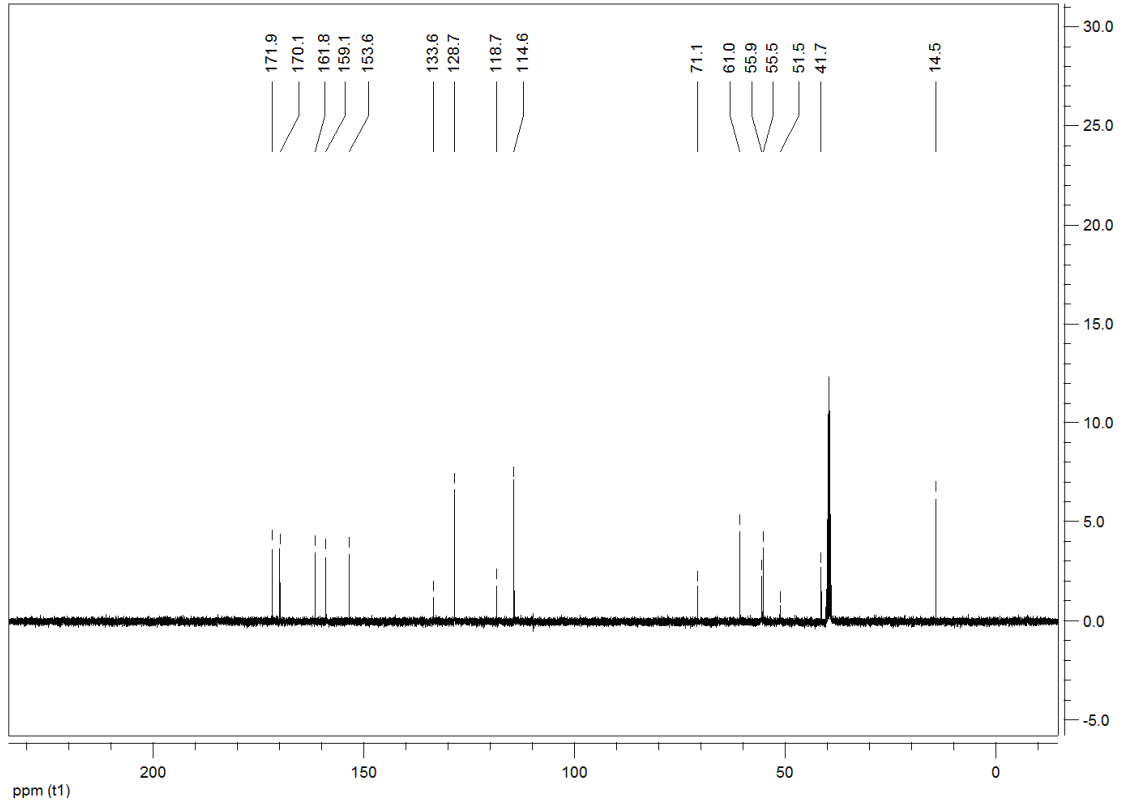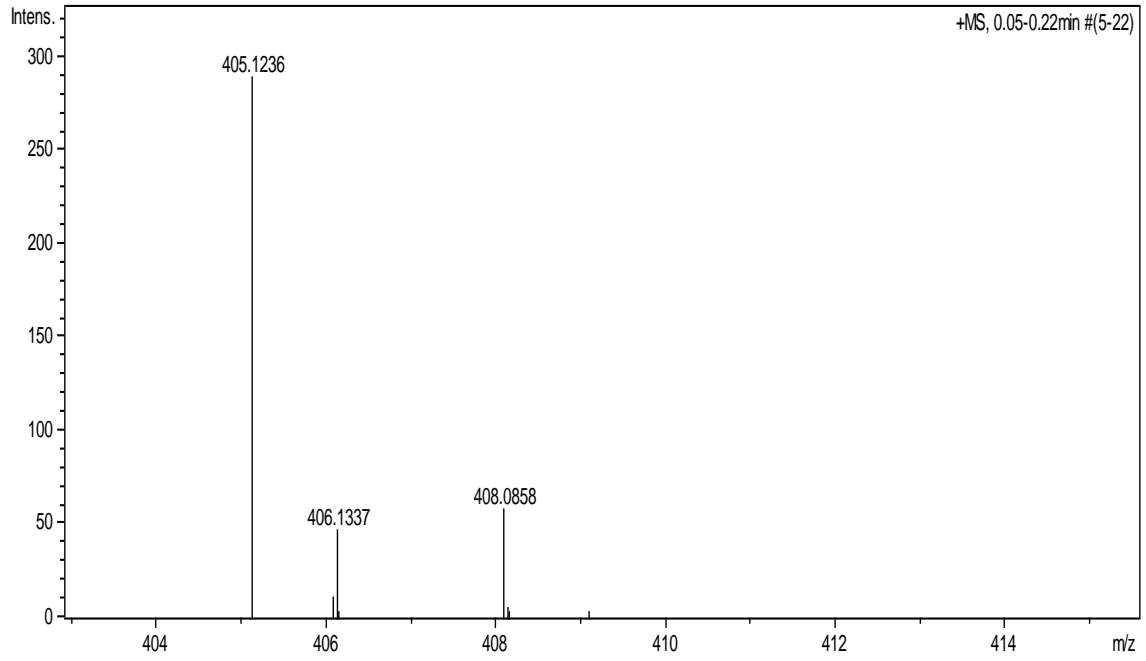



## Ethyl

### ((5-amino-4-cyano-3-(2-methoxyphenyl)-2,3-dihydrothiophene-2-carbonyl)carbamoyl)glycin

**ate (1c):** yellow solid, 63%, m.p. 220-222°C;  $^1\text{H}$  NMR (400 MHz,  $\text{DMSO-}d_6$ )  $\delta$ : 10.48 (s, 1H, NH), 8.53 (s, 1H, NH), 7.30-7.26 (m, 1H, ArH), 7.20 (s, 2H,  $\text{NH}_2$ ), 7.12-7.11 (m, 1H, ArH), 7.03-7.01 (m, 1H, ArH), 6.98-6.95 (m, 1H, ArH), 4.81 (s, 1H, CH), 4.09 (q,  $J = 7.2$  Hz, 2H,  $\text{CH}_2$ ), 3.93 (d,  $J = 5.6$  Hz, 2H, CH), 3.88 (s, 1H, CH), 3.76 (s, 3H,  $\text{OCH}_3$ ), 1.18 (t,  $J = 7.2$  Hz, 3H,  $\text{CH}_3$ );  $^{13}\text{C}$  NMR (100 MHz,  $\text{DMSO-}d_6$ )  $\delta$ : 172.5, 170.1, 162.7, 156.7, 153.6, 129.1, 129.0, 127.1, 120.8, 118.6, 111.5, 68.1, 61.0, 56.0, 54.5, 45.8, 41.7, 14.5; IR (KBr)  $\nu$ : 3407, 3337, 3238, 3124, 2977, 2175, 1739, 1698, 1650, 1577, 1549, 1494, 1389, 1352, 1283, 1239, 1138, 1105, 1022, 807  $\text{cm}^{-1}$ ; MS ( $m/z$ ): HRMS (ESI) Calcd. for  $\text{C}_{18}\text{H}_{20}\text{N}_4\text{O}_5\text{S}$  ( $[\text{M}+\text{Na}]^+$ ): 427.1154, found: 427.1050.

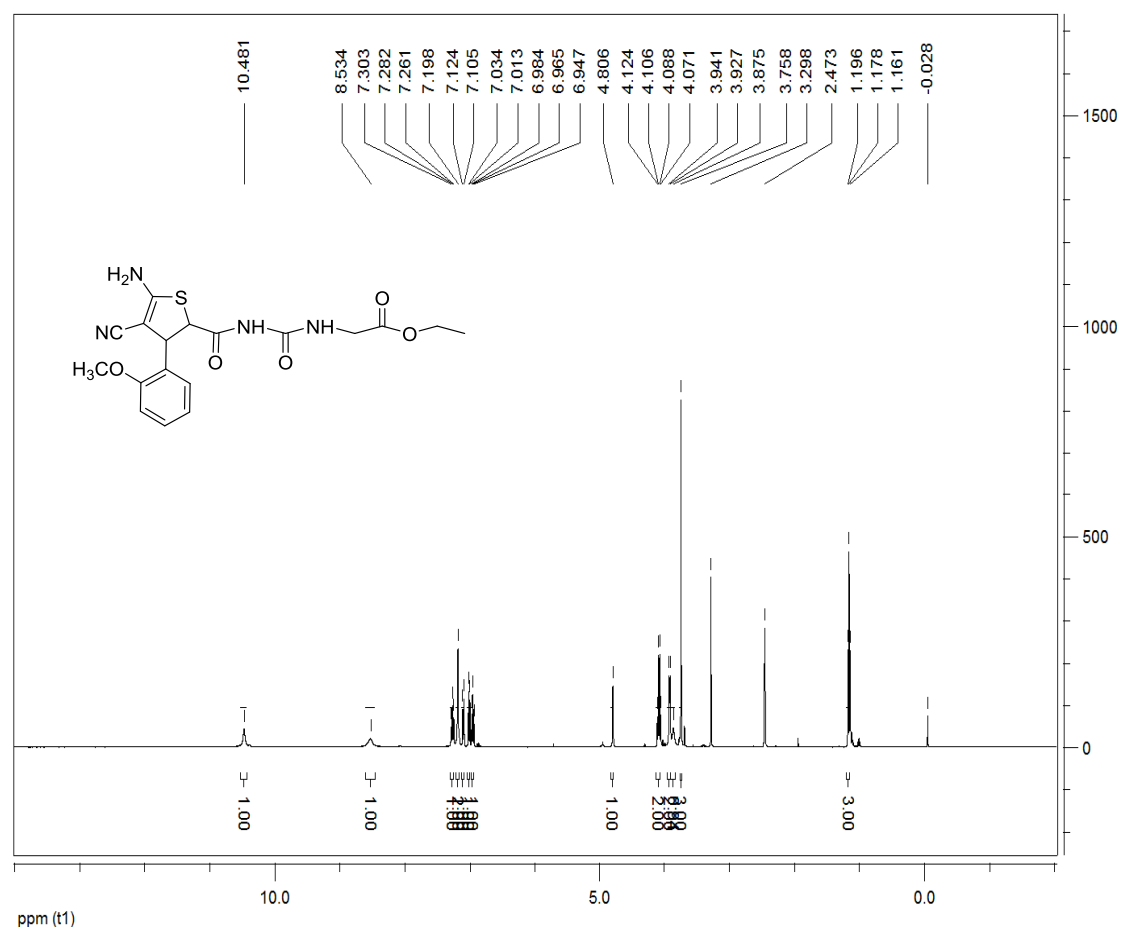

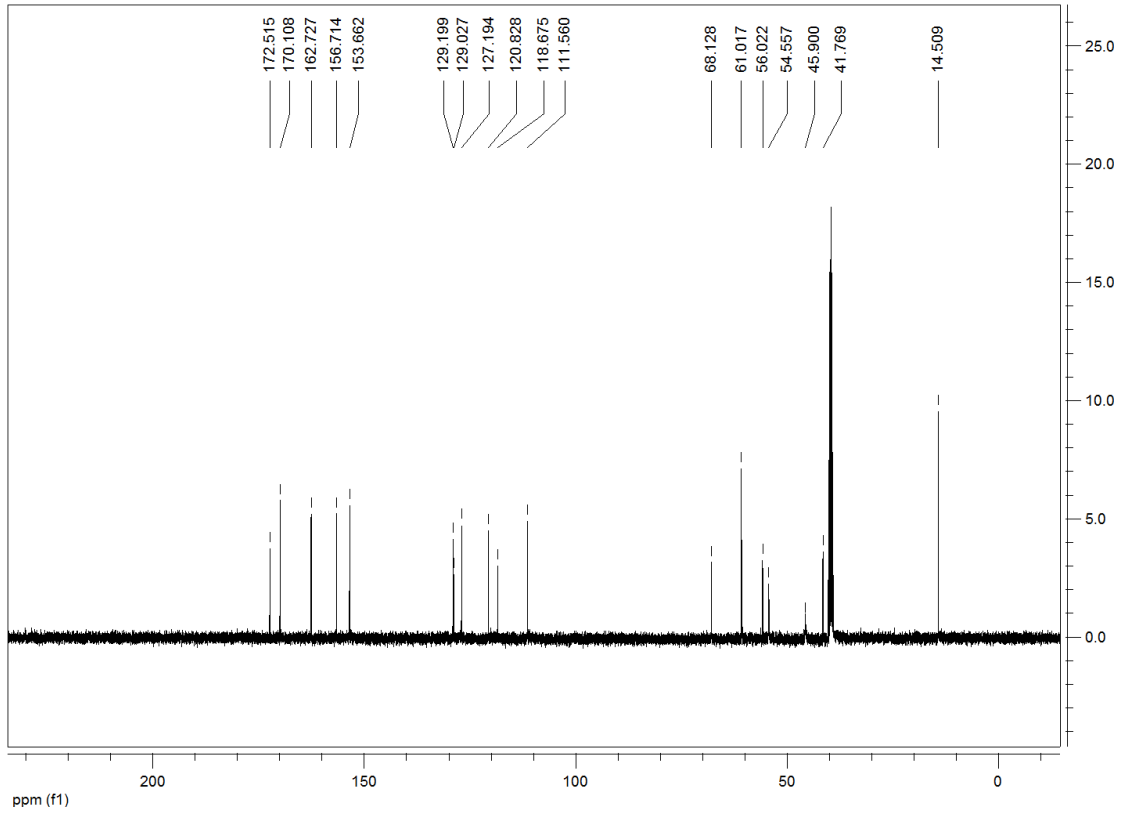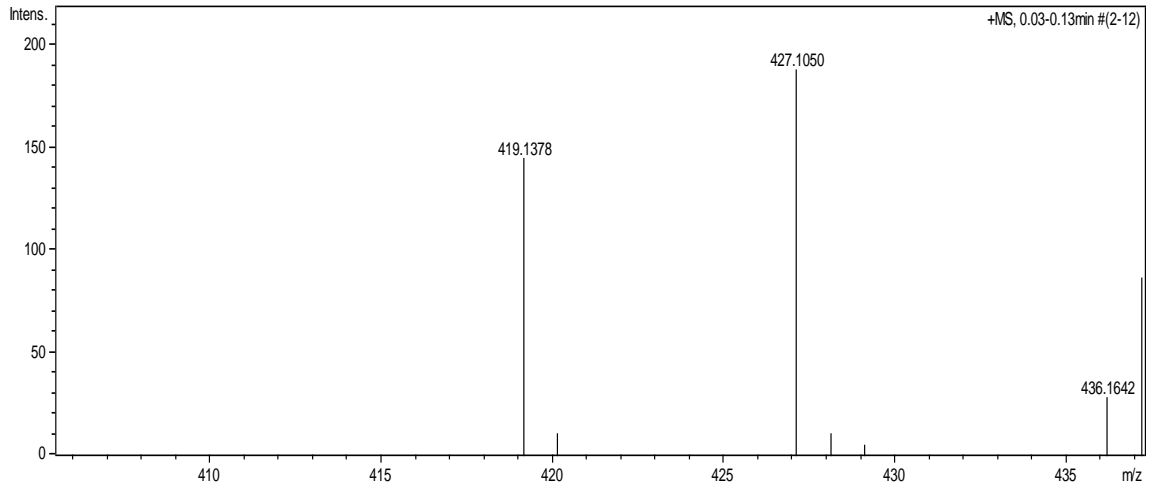

**Ethyl ((5-amino-4-cyano-3-(p-tolyl)-2,3-dihydrothiophene-2-carbonyl)carbamoyl)glycinate**

(**1d**): yellow solid, 60%, m.p. 204-206°C; <sup>1</sup>H NMR (400 MHz, DMSO-*d*<sub>6</sub>) δ: 10.54 (s, 1H, NH), 8.50 (s, 1H, NH), 7.20-7.18 (m, 4H, ArH), 7.15 (s, 2H, NH<sub>2</sub>), 4.52 (d, *J* = 3.2 Hz, 1H, CH), 4.14-4.09 (m, 3H, CH), 3.94 (d, *J* = 6.0 Hz, 2H, CH), 2.29 (s, 3H, CH<sub>3</sub>), 1.20 (t, *J* = 7.2 Hz, 3H, CH<sub>3</sub>); <sup>13</sup>C NMR (100 MHz, DMSO-*d*<sub>6</sub>) δ: 171.9, 170.0, 161.9, 153.5, 138.7, 137.1, 129.7, 127.4, 118.6, 70.8, 61.0, 55.7, 51.8, 41.7, 21.0, 14.5; IR (KBr) ν: 3436, 3326, 3226, 2976, 2177, 1747, 1697, 1630, 1579, 1498, 1350, 1256, 1191, 1025, 981, 885 cm<sup>-1</sup>; MS (*m/z*): HRMS (ESI) Calcd. for C<sub>18</sub>H<sub>20</sub>N<sub>4</sub>O<sub>4</sub>S ([M+Na]<sup>+</sup>): 411.1205, found: 411.1096.

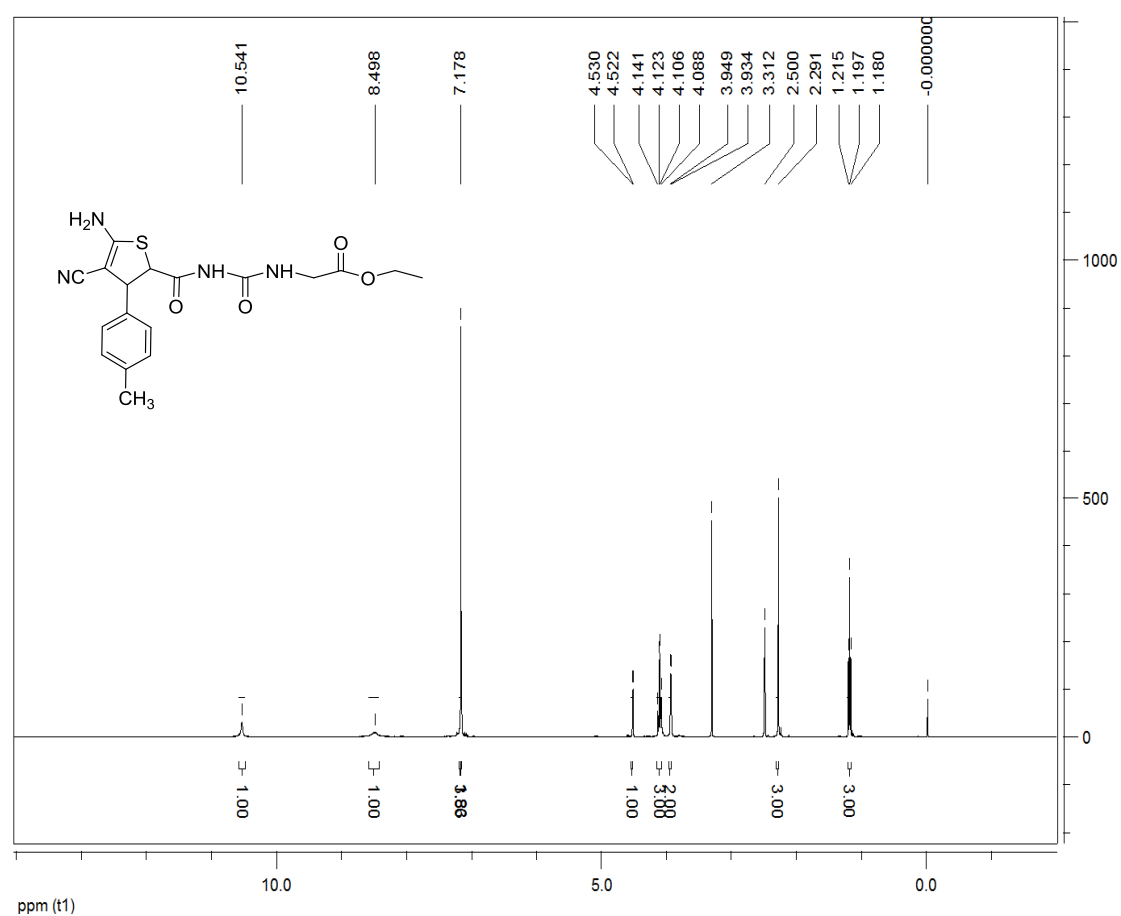

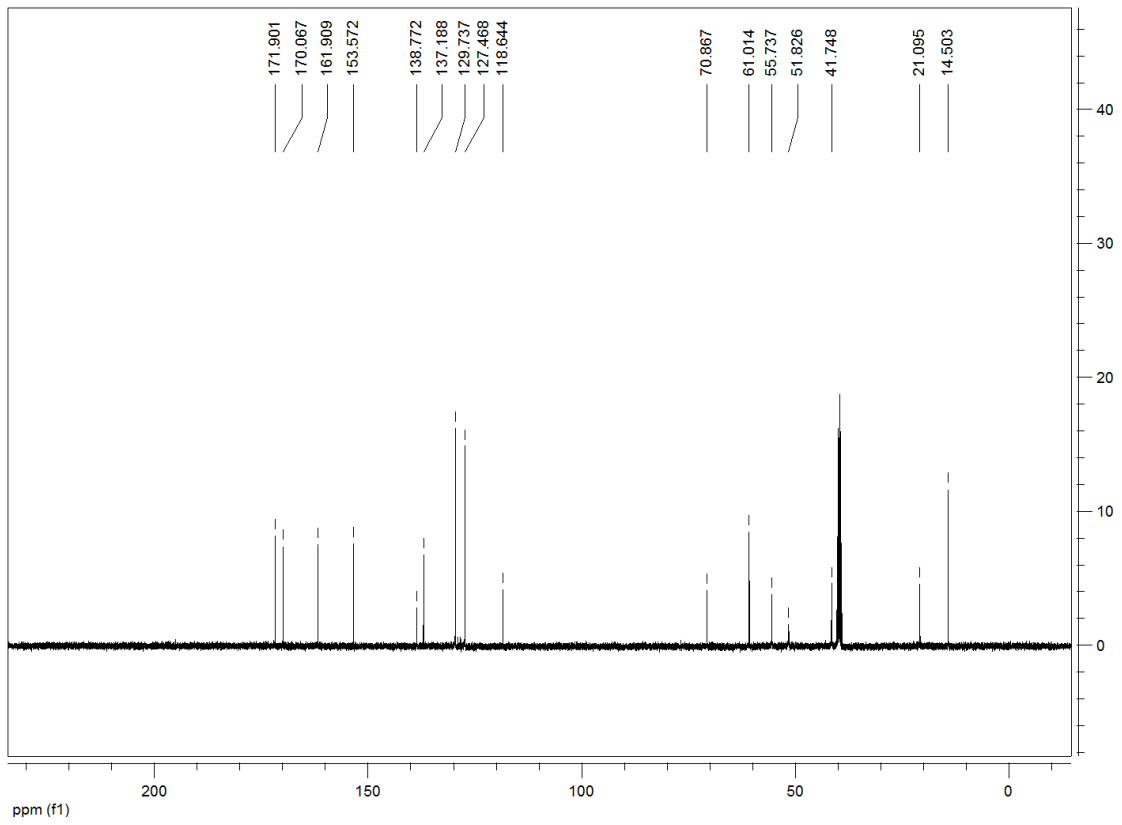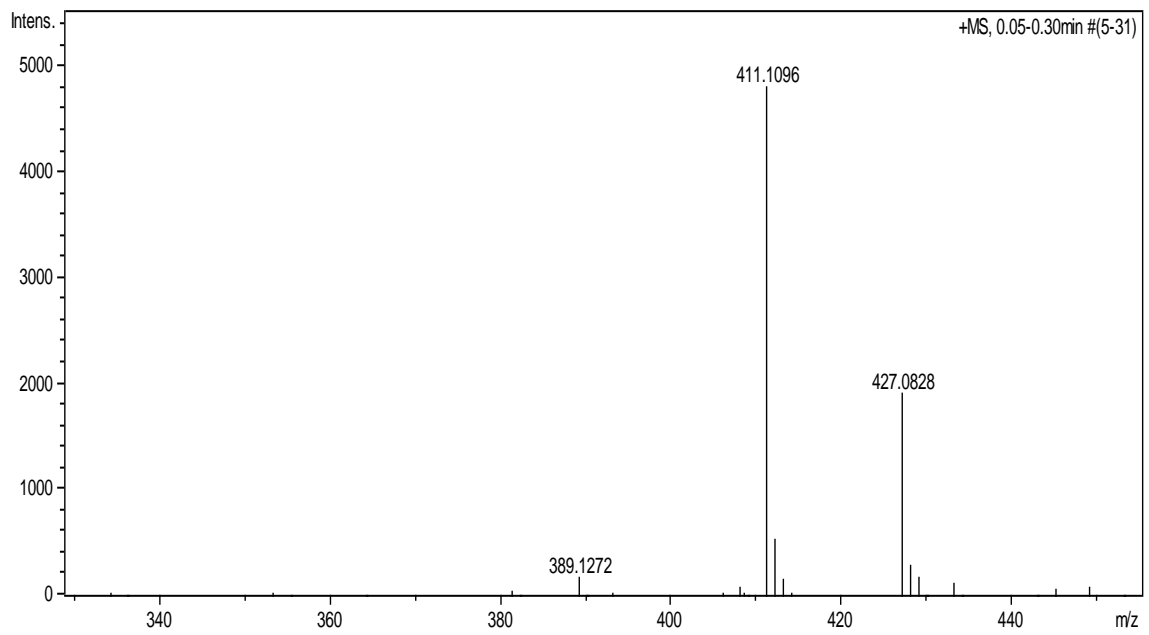

**Ethyl ((5-amino-4-cyano-3-(m-tolyl)-2,3-dihydrothiophene-2-carbonyl)carbamoyl)glycinate**

(**1e**): yellow solid, 54%, m.p. 208-210°C; <sup>1</sup>H NMR (400 MHz, DMSO-*d*<sub>6</sub>) δ: 10.53 (s, 1H, NH), 8.50 (s, 1H, NH), 7.28-7.24 (m, 1H, ArH), 7.18 (s, 2H, NH<sub>2</sub>), 7.12-7.08 (m, 3H, ArH), 4.53 (s, 1H, CH), 4.14-4.09 (m, 3H, CH), 3.94 (d, *J* = 6.0 Hz, 2H, CH), 2.31 (s, 3H, CH<sub>3</sub>), 1.20 (t, *J* = 7.2 Hz, 3H, CH<sub>3</sub>); <sup>13</sup>C NMR (100 MHz, DMSO-*d*<sub>6</sub>) δ: 171.9, 170.0, 162.0, 153.5, 141.8, 138.3, 129.1, 128.6, 128.1, 124.6, 118.6, 70.7, 61.0, 55.6, 52.0, 41.7, 21.5, 14.5; IR (KBr) ν: 3424, 3332, 3226, 3157, 2978, 2177, 1739, 1682, 1629, 1586, 1499, 1413, 1342, 1264, 1195, 1133, 1030, 985 892, 817 cm<sup>-1</sup>; MS (*m/z*): HRMS (ESI) Calcd. for C<sub>18</sub>H<sub>20</sub>N<sub>4</sub>O<sub>4</sub>S ([M+Na]<sup>+</sup>): 411.1205, found: 411.1097.

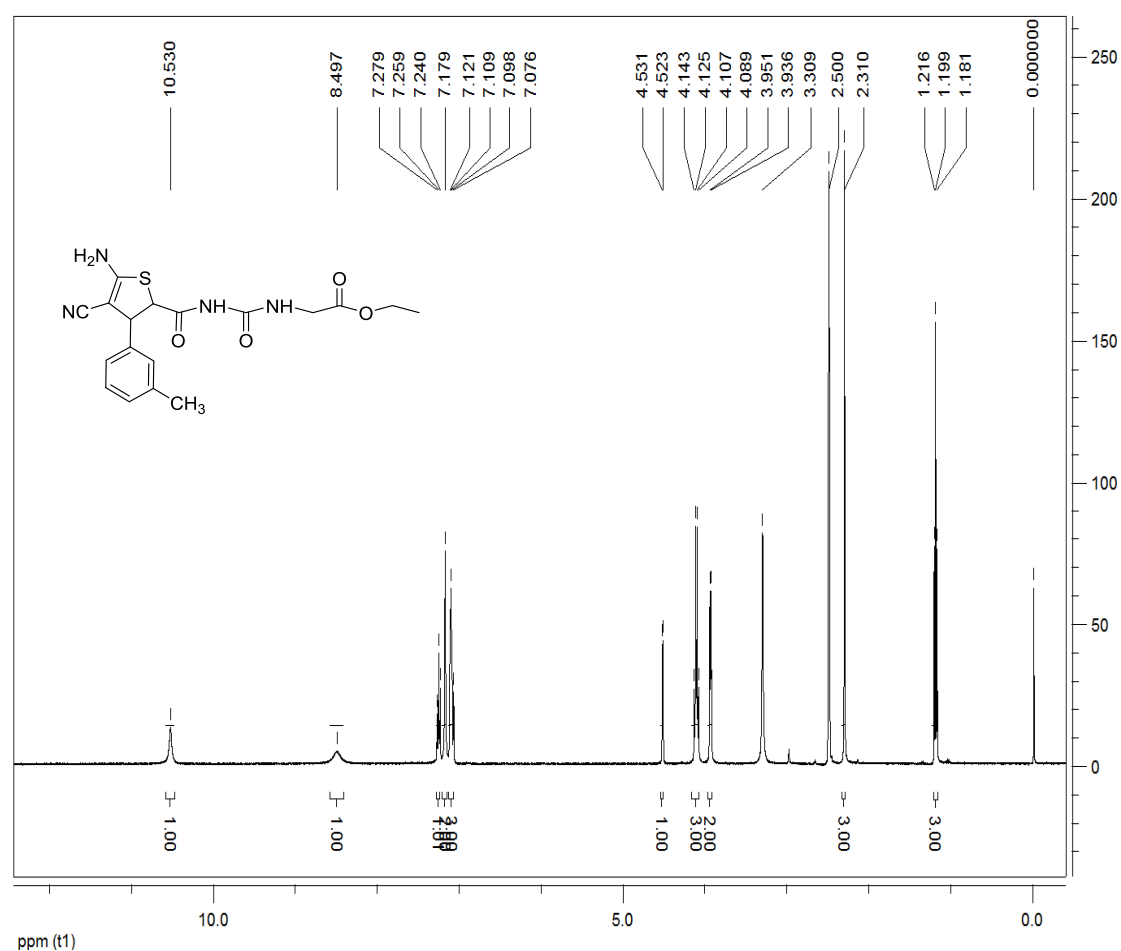

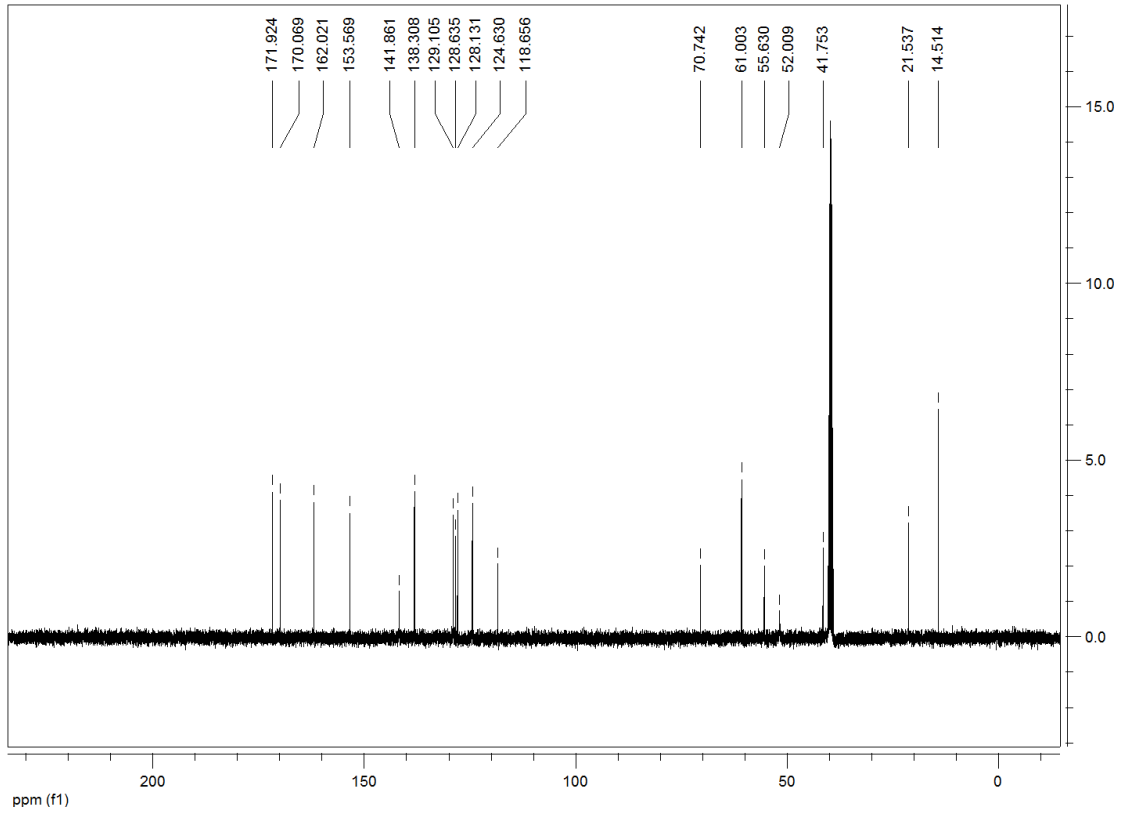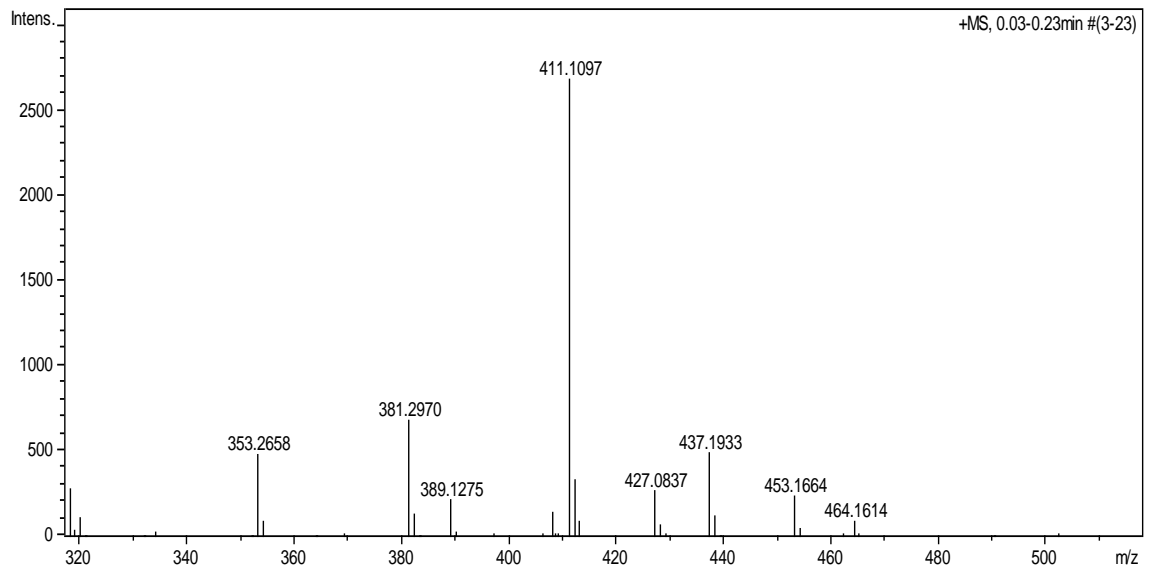

## Ethyl

### ((5-amino-3-(4-chlorophenyl)-4-cyano-2,3-dihydrothiophene-2-carbonyl)carbamoyl)glycinat

**e (1f)**: yellow solid, 66%, m.p. 195-197°C;  $^1\text{H}$  NMR (400 MHz,  $\text{DMSO-}d_6$ )  $\delta$ : 10.55 (s, 1H, NH), 8.51 (s, 1H, NH), 7.46-7.44 (m, 2H, ArH), 7.35-7.33 (m, 2H, ArH), 7.26 (s, 2H,  $\text{NH}_2$ ), 4.57 (d,  $J = 2.8$  Hz, 1H, CH), 4.14-4.08 (m, 3H, CH), 3.94 (d,  $J = 5.6$  Hz, 2H, CH), 1.20 (t,  $J = 7.2$  Hz, 3H,  $\text{CH}_3$ );  $^{13}\text{C}$  NMR (100 MHz,  $\text{DMSO-}d_6$ )  $\delta$ : 171.7, 170.0, 162.3, 153.5, 140.8, 132.5, 129.5, 129.1, 118.5, 70.3, 60.9, 55.5, 51.2, 41.7, 14.5; IR (KBr)  $\nu$ : 3453, 3342, 3236, 3113, 2969, 2190, 1740, 1706, 1613, 1582, 1529, 1408, 1339, 1266, 1203, 1095, 1023, 982, 826  $\text{cm}^{-1}$ ; MS ( $m/z$ ): HRMS (ESI) Calcd. for  $\text{C}_{17}\text{H}_{17}\text{ClN}_4\text{O}_4\text{S}$  ( $[\text{M}+\text{H}]^+$ ): 409.0659, found: 409.0722.

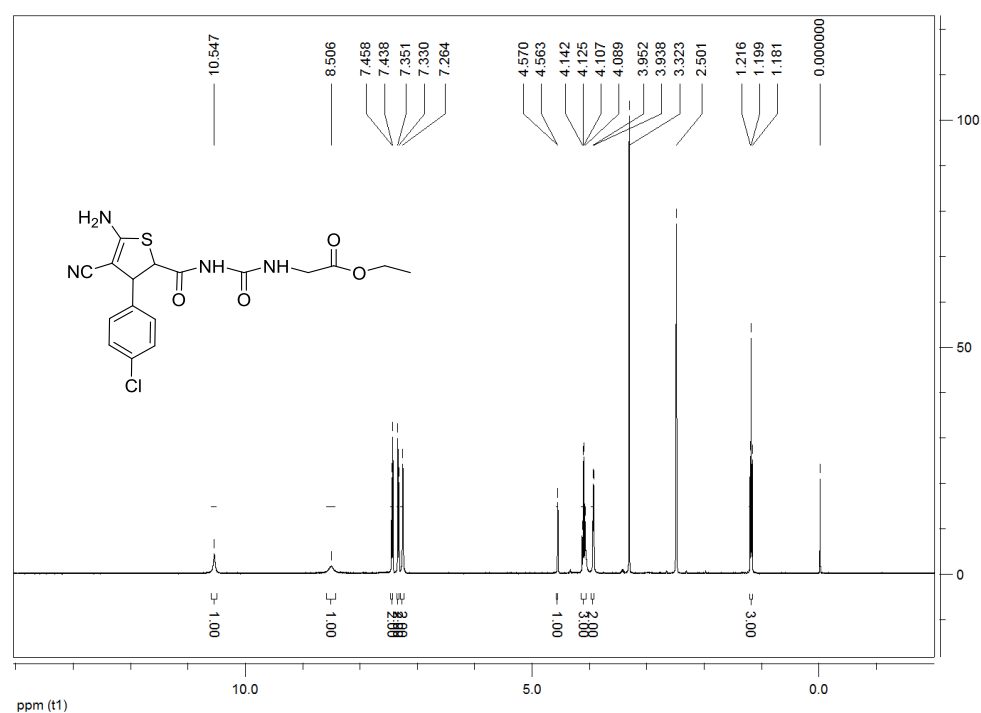

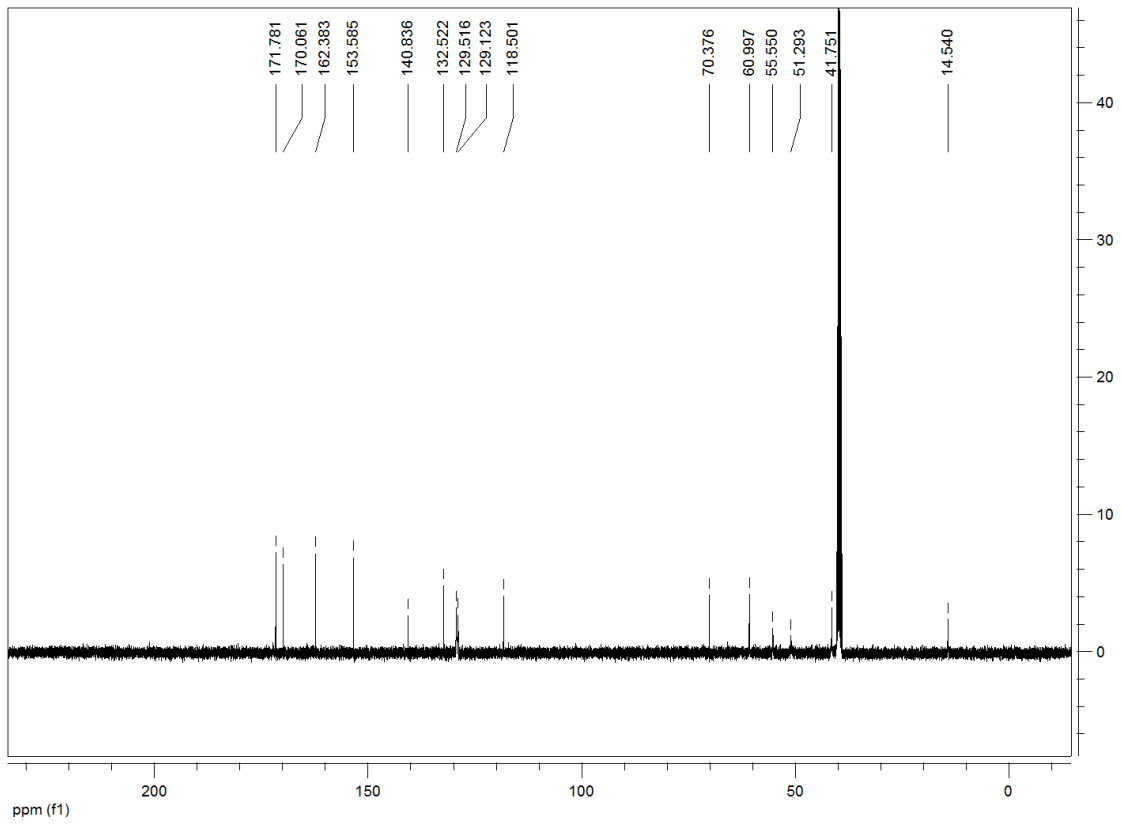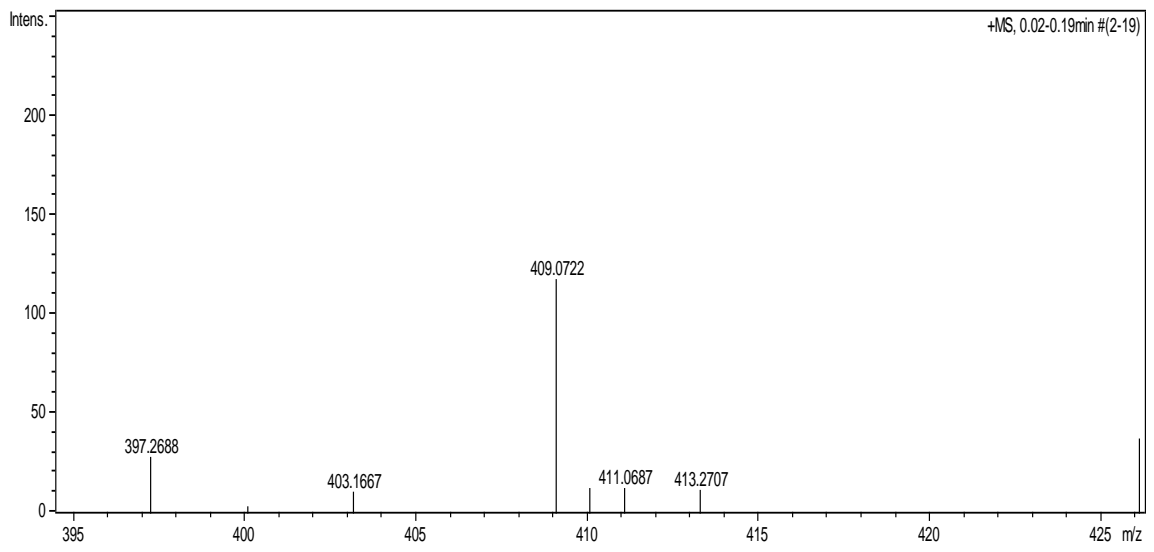



## Ethyl

### ((5-amino-4-cyano-3-(3-nitrophenyl)-2,3-dihydrothiophene-2-carbonyl)carbamoyl)glycinate

(**1g**): yellow solid, 58%, m.p. 188-190°C; <sup>1</sup>H NMR (400 MHz, DMSO-*d*<sub>6</sub>) δ: 10.54 (s, 1H, NH), 8.54 (s, 1H, NH), 8.22-8.17 (m, 2H, ArH), 7.82-7.80 (m, 1H, ArH), 7.72-7.68 (m, 1H, ArH), 7.38 (s, 2H, NH<sub>2</sub>), 4.74 (s, 1H, CH), 4.13-4.11 (m, 3H, CH), 3.96-3.95 (m, 2H, CH), 1.20 (t, *J* = 6.8 Hz, 3H, CH<sub>3</sub>); <sup>13</sup>C NMR (100 MHz, DMSO-*d*<sub>6</sub>) δ: 172.7, 171.4, 171.3, 161.9, 161.8, 153.3, 153.2, 138.9, 137.2, 137.1, 129.6, 127.4, 118.6, 71.0, 61.2, 57.0, 55.7, 51.6, 37.3, 25.1, 21.0, 15.9, 14.5, 11.7; IR (KBr) ν: 3343, 3207, 2967, 2168, 1709, 1615, 1580, 1534, 1511, 1346, 1240, 1181, 1028, 831 cm<sup>-1</sup>; MS (*m/z*): HRMS (ESI) Calcd. for C<sub>17</sub>H<sub>17</sub>N<sub>5</sub>NaO<sub>6</sub>S ([M+H]<sup>+</sup>): 442.0792, found: 442.0798.

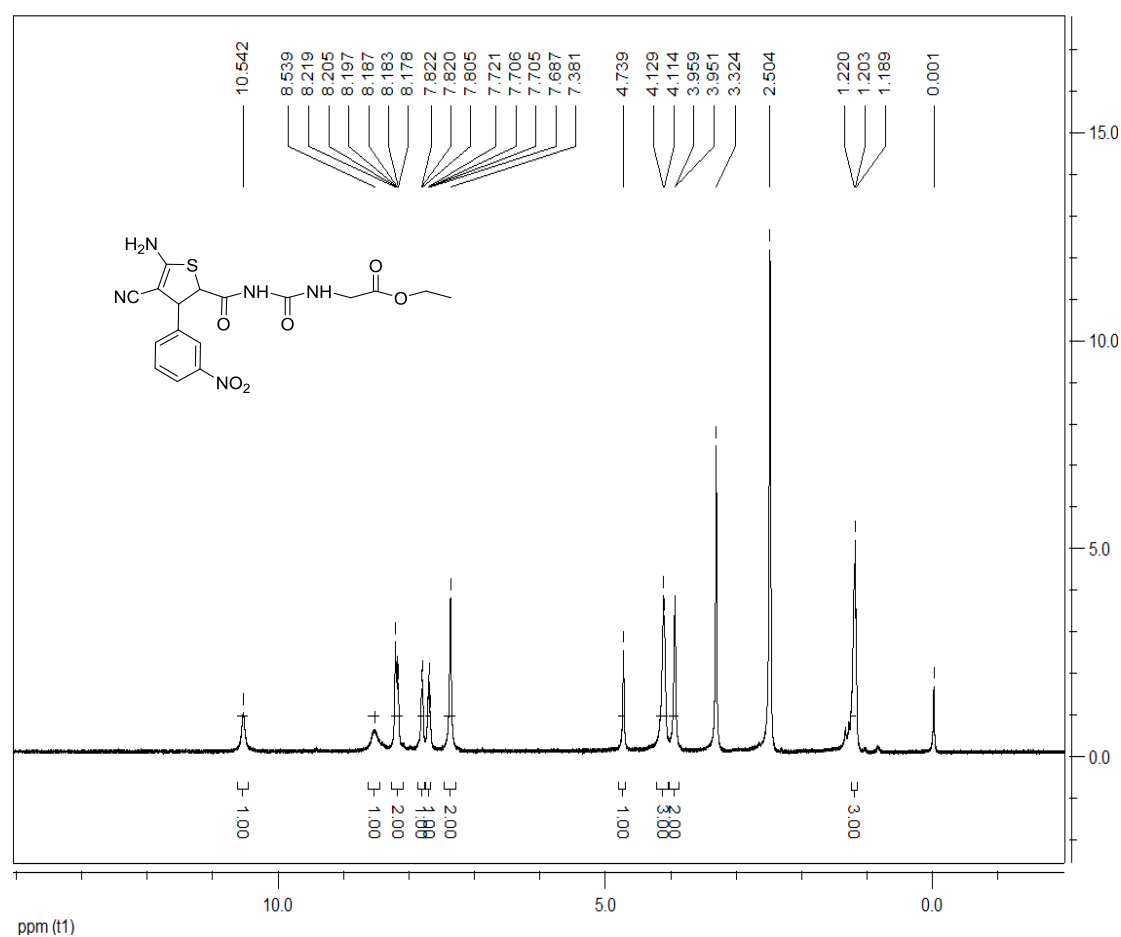

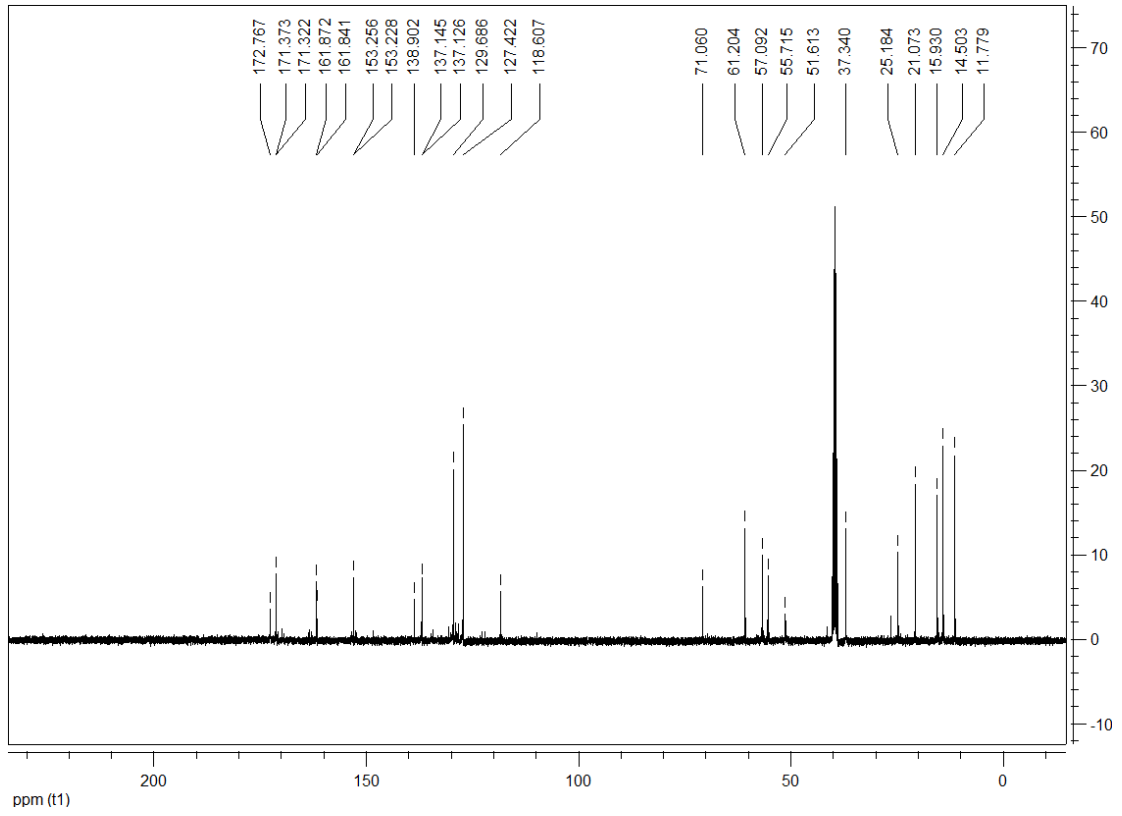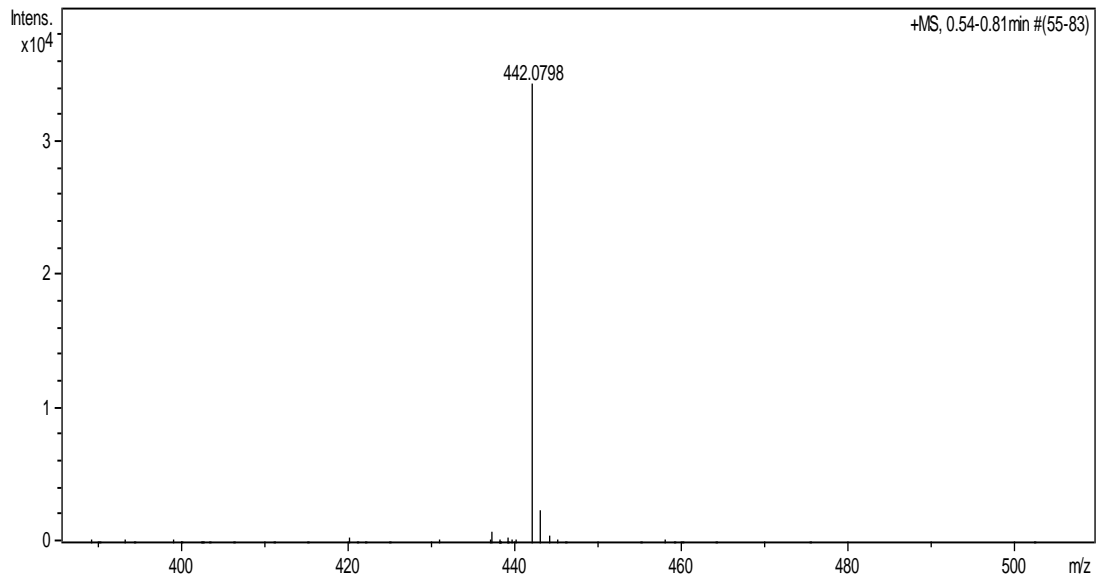

**Ethyl ((5'-amino-4'-cyano-2',3'-dihydro-[2,3'-bithiophene]-2'-carbonyl)carbamoyl)glycinate**

(1h): yellow solid, 60%, m.p. 179-181 °C; <sup>1</sup>H NMR (400 MHz, DMSO-*d*<sub>6</sub>) δ: 10.60 (s, 1H, NH), 8.52 (s, 1H, NH), 7.44-7.42 (m, 1H, ArH), 7.27 (s, 2H, NH<sub>2</sub>), 7.07-7.04 (m, 1H, ArH), 7.01-6.99 (m, 1H, ArH), 4.86 (d, *J* = 2.4 Hz, 1H, CH), 4.15-4.09 (m, 3H, CH), 3.94 (d, *J* = 5.6 Hz, 2H, CH), 1.20 (t, *J* = 7.2 Hz, 3H, CH<sub>3</sub>); <sup>13</sup>C NMR (100 MHz, DMSO-*d*<sub>6</sub>) δ: 171.6, 170.0, 161.9, 153.5, 146.1, 127.5, 125.5, 125.4, 118.4, 71.5, 61.0, 55.9, 47.3, 41.7, 14.5; IR (KBr) ν: 3469, 3308, 3393, 3117, 3073, 2997, 2253, 1704, 1691, 1554, 1536, 1318, 1235, 1210, 1118, 1077, 947, 856 cm<sup>-1</sup>; MS (*m/z*): HRMS (ESI) Calcd. for C<sub>15</sub>H<sub>14</sub>NaN<sub>4</sub>O<sub>4</sub>S<sub>2</sub> ([M+Na]<sup>+</sup>): 403.0505, found: 403.0498.

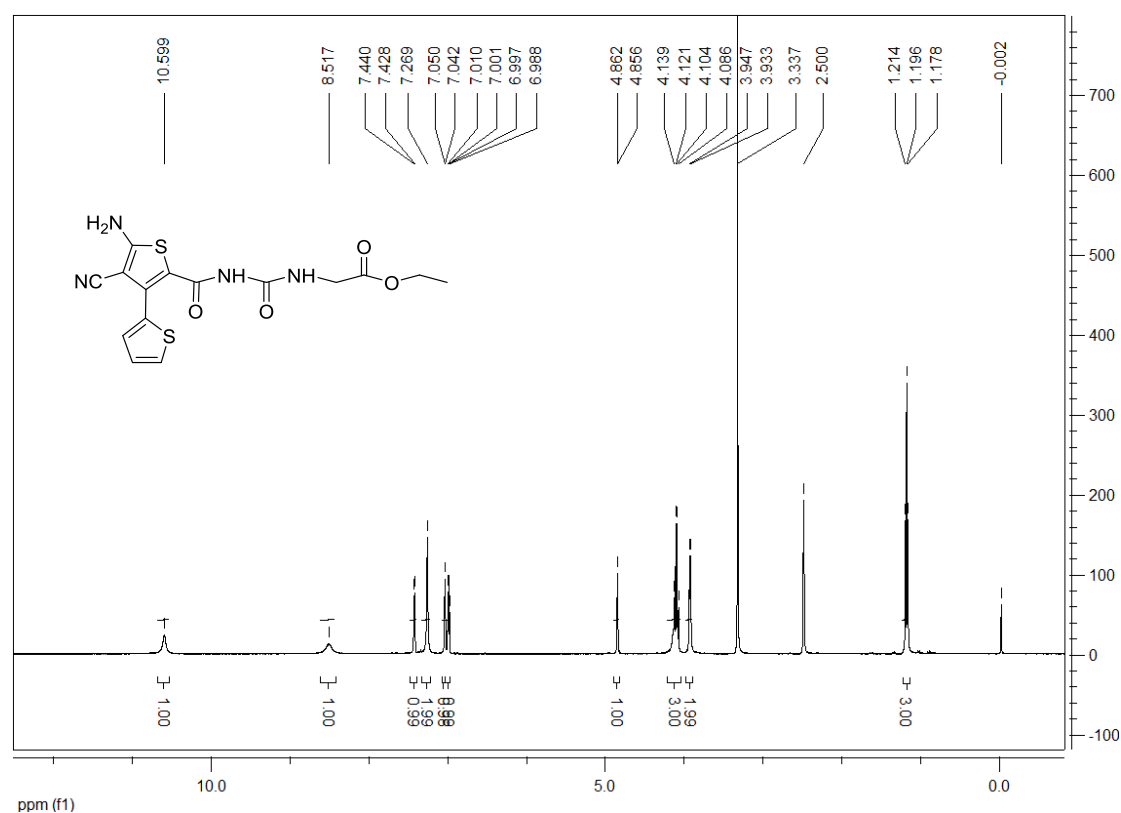

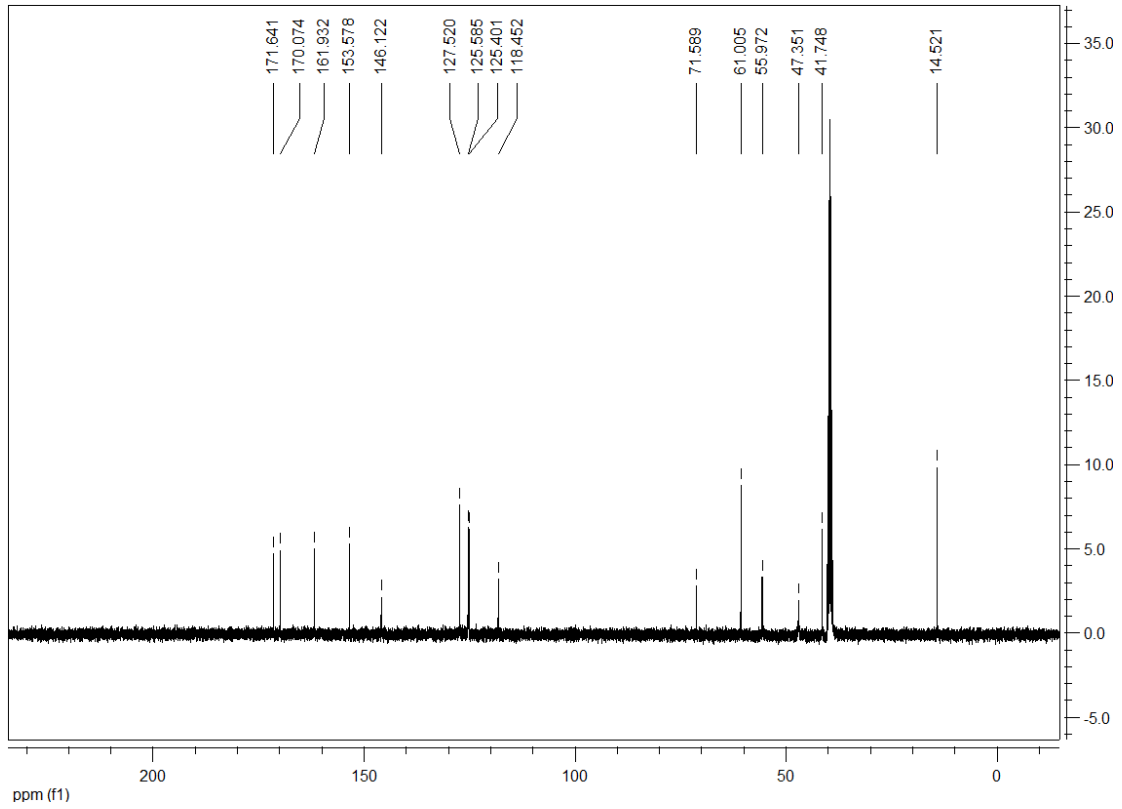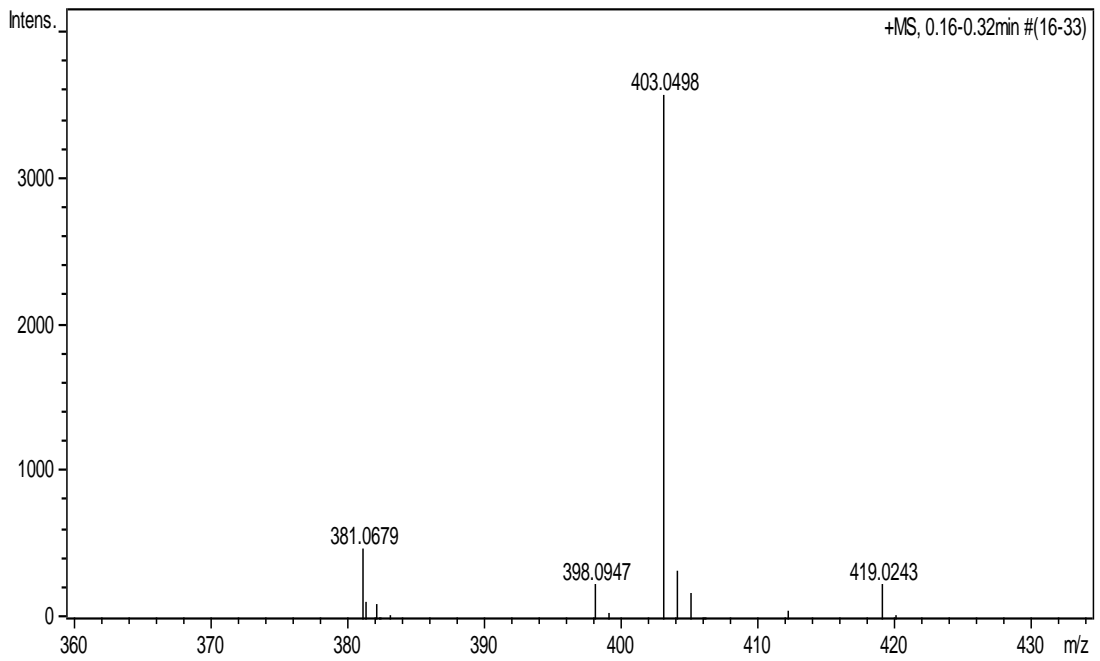

## Ethyl

### ((5-amino-4-cyano-3-(4-methoxyphenyl)-2,3-dihydrothiophene-2-carbonyl)carbamoyl)alaninate (**2a**):

white solid, 68%, m.p. 218-220 °C; <sup>1</sup>H NMR (400 MHz, DMSO-*d*<sub>6</sub>) δ: 10.58 (s, 1H, NH), 8.52 (s, 1H, NH), 7.23-7.18 (m, 4H, ArH, NH<sub>2</sub>), 6.93 (d, *J* = 8.8 Hz, 2H, ArH), 4.51-4.50 (m, 1H, CH), 4.34-4.27 (m, 1H, CH), 4.12 (m, 2H, CH), 4.05 (s, 2H, CH), 3.75 (s, 3H, OCH<sub>3</sub>), 1.36 (d, *J* = 7.2 Hz, 3H, CH<sub>3</sub>), 1.20 (t, *J* = 7.2 Hz, 3H, CH<sub>3</sub>); <sup>13</sup>C NMR (100 MHz, DMSO-*d*<sub>6</sub>) δ: 172.5, 172.3, 161.7, 159.1, 152.8, 133.6, 128.6, 118.6, 114.5, 71.1, 61.2, 55.8, 55.5, 51.4, 48.6, 18.0, 14.4; IR (KBr) ν: 3449, 3328, 3227, 3155, 2968, 2848, 2180, 1740, 1695, 1624, 1582, 1547, 1506, 1348, 1309, 1252, 1193, 1030, 829 cm<sup>-1</sup>; MS (*m/z*): HRMS (ESI) Calcd. for C<sub>19</sub>H<sub>22</sub>N<sub>4</sub>O<sub>5</sub>S ([M+Na]<sup>+</sup>): 441.1311, found: 441.1206.

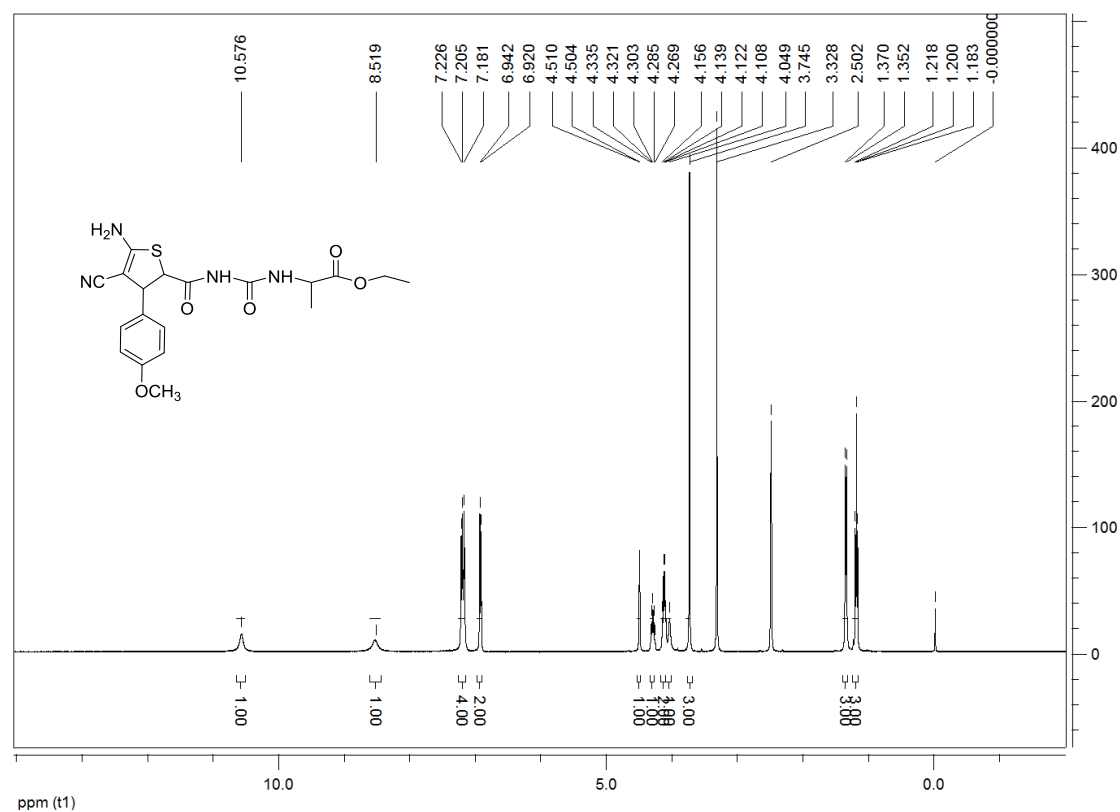

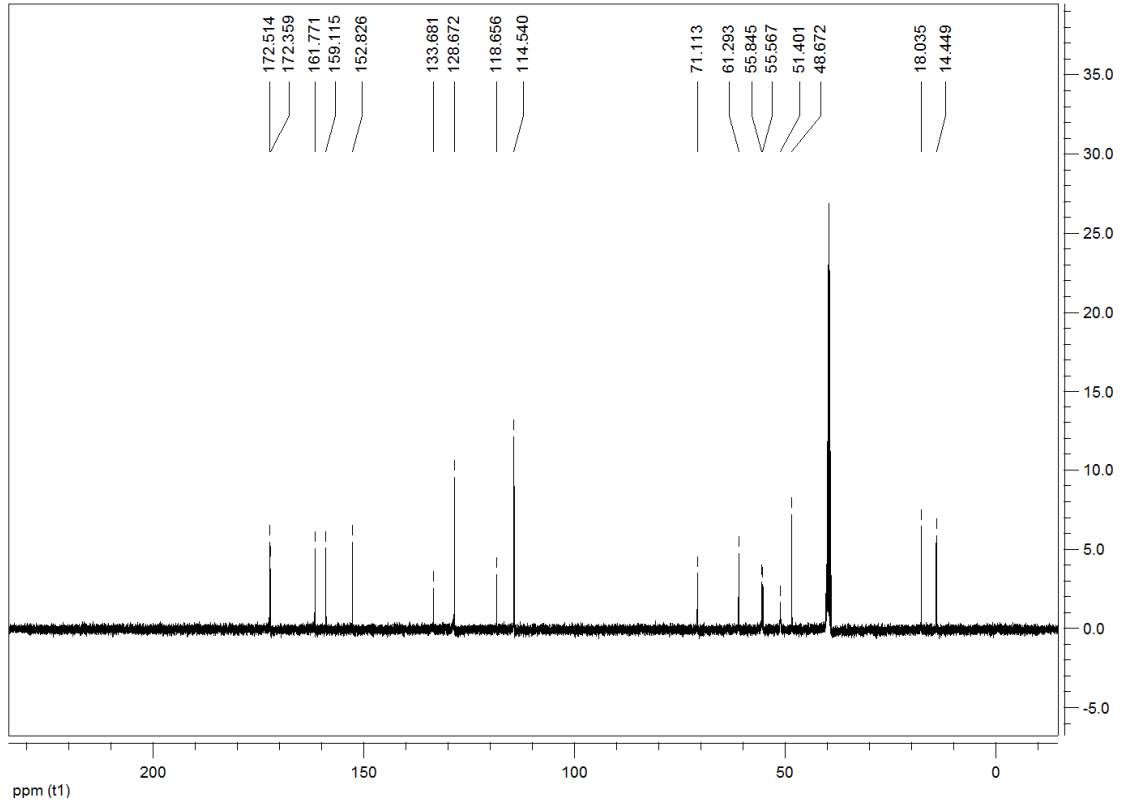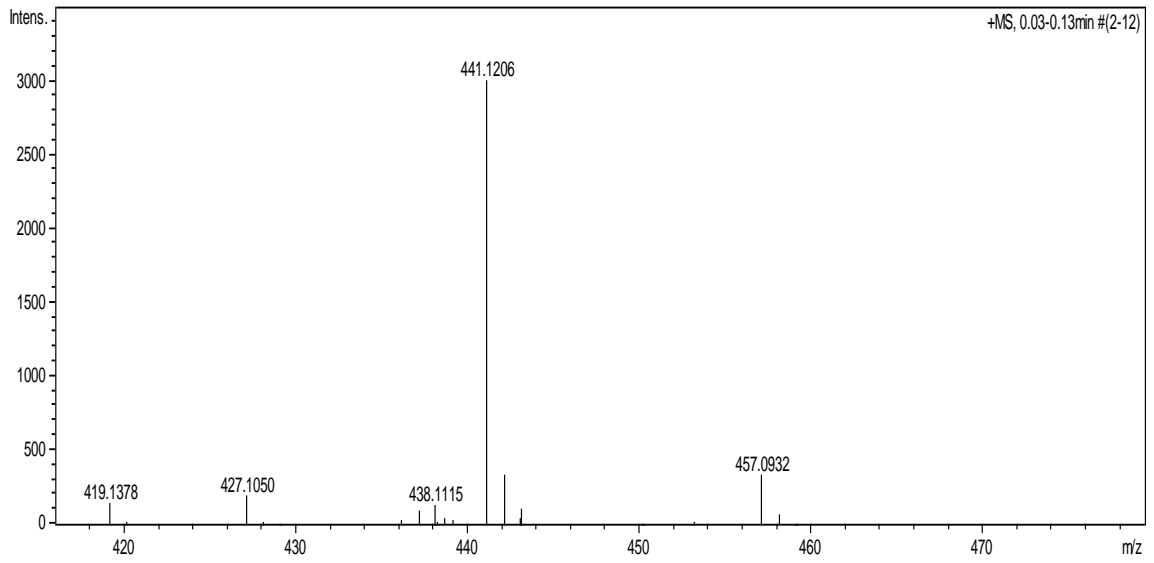

## Ethyl

### ((5-amino-4-cyano-3-(3-nitrophenyl)-2,3-dihydrothiophene-2-carbonyl)carbamoyl)alaninate

(**2b**): white solid, 55%, m.p. 248-250 °C; <sup>1</sup>H NMR (400 MHz, DMSO-*d*<sub>6</sub>) δ: 10.56 (s, 1H, NH), 8.54 (s, 1H, NH), 8.23-8.17 (m, 2H, ArH), 7.81 (d, *J* = 7.2 Hz, 1H, ArH), 7.72-7.68 (m, 1H, ArH), 7.37 (s, 2H, NH<sub>2</sub>), 4.74 (s, 1H, CH), 4.34-4.30 (m, 1H, CH), 4.16-4.11 (m, 3H, CH), 1.37 (d, *J* = 6.4 Hz, 3H, CH<sub>3</sub>), 1.20 (t, *J* = 7.2 Hz, 3H, CH<sub>3</sub>); <sup>13</sup>C NMR (100 MHz, DMSO-*d*<sub>6</sub>) δ: 172.5, 172.0, 163.0, 152.8, 148.4, 144.1, 134.6, 134.5, 134.4, 134.3, 134.4, 134.3, 130.7, 130.6, 130.5, 130.4, 123.0, 122.9, 122.3, 122.2, 118.3, 69.8, 61.2, 61.1, 61.0, 55.5, 55.4, 55.3, 55.2, 51.0, 50.9, 48.6, 48.5, 18.1, 18.0, 14.4, 14.3; IR (KBr) ν: 3440, 3329, 3221, 3138, 2974, 2921, 2851, 2183, 1738, 1692, 1632, 1585, 1530, 1348, 1251, 1200, 1140, 987, 922, 868 cm<sup>-1</sup>; MS (*m/z*): HRMS (ESI) Calcd. for C<sub>18</sub>H<sub>19</sub>N<sub>5</sub>O<sub>6</sub>S ([M+Na]<sup>+</sup>): 456.1056, found: 456.0954.

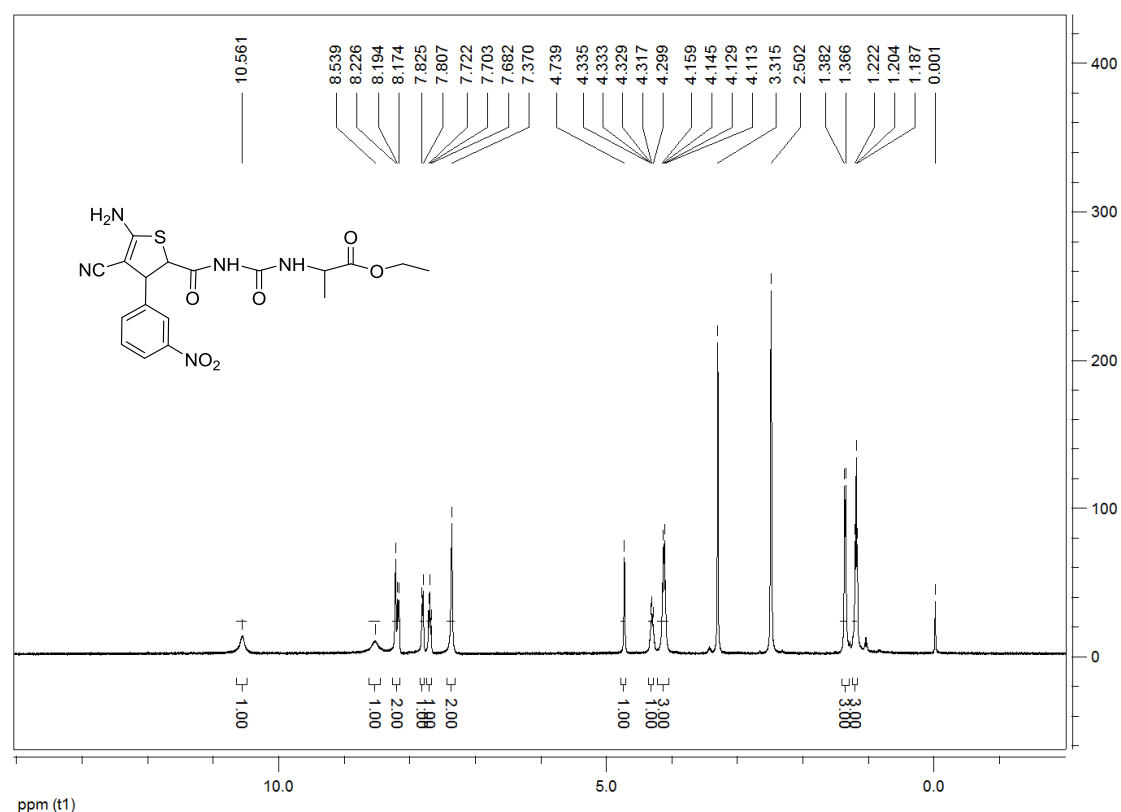

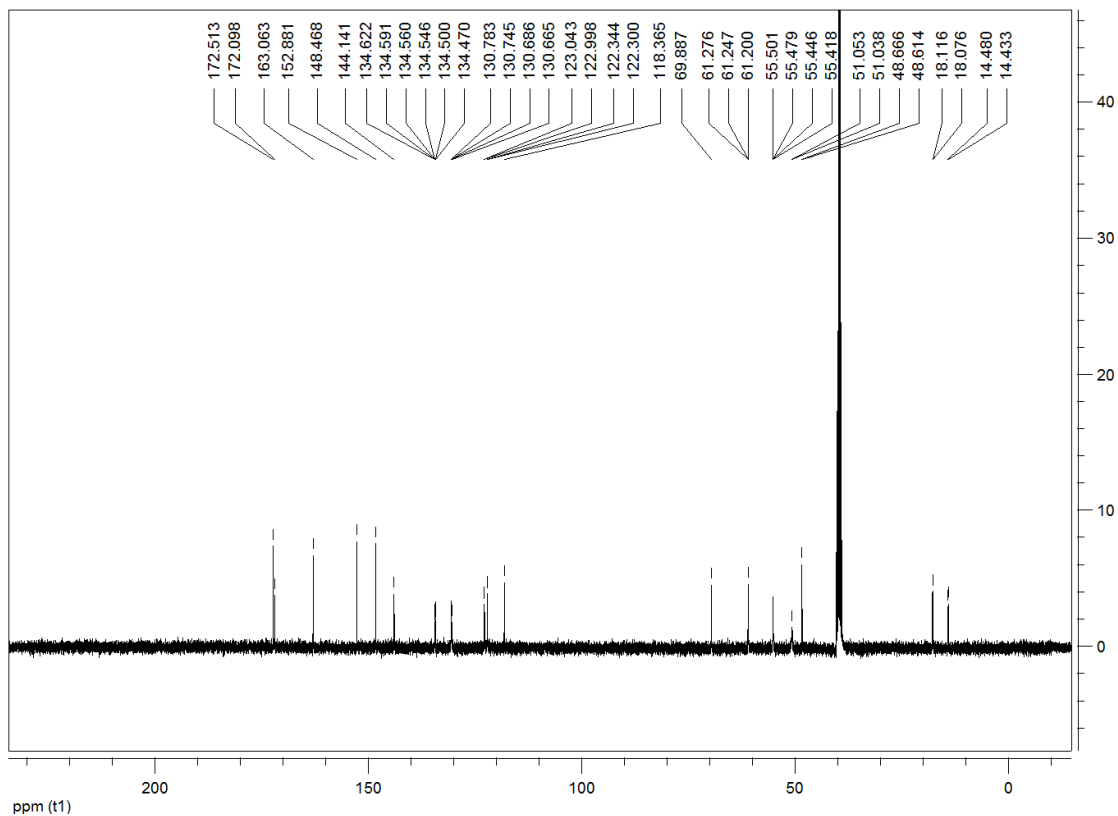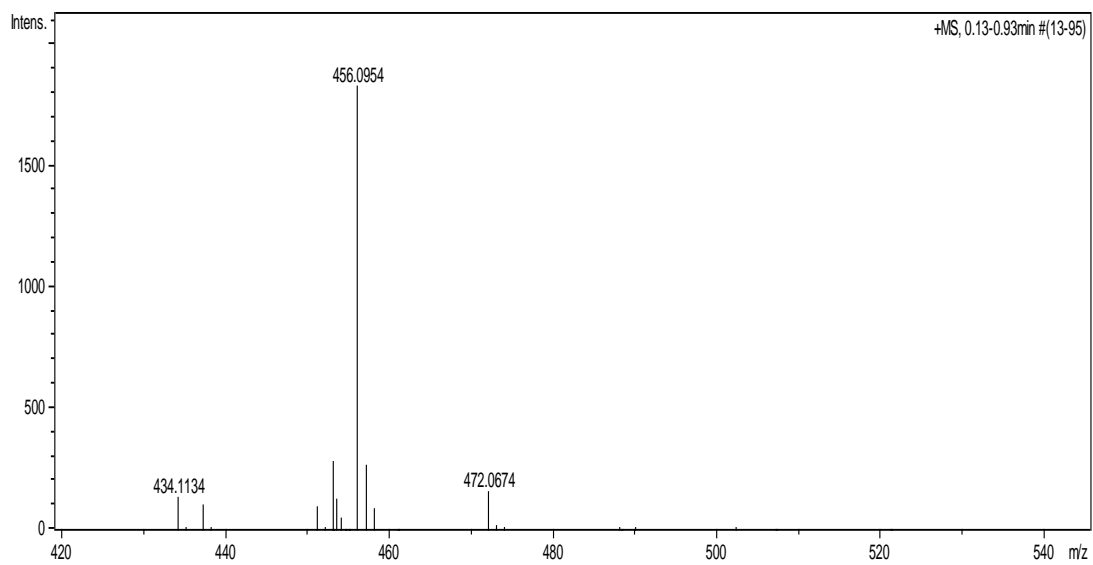



**Ethyl ((5-amino-4-cyano-3-(p-tolyl)thiophene-2-carbonyl)carbamoyl)serinate (2c):** white solid, 63%, m.p. 187-189°C; <sup>1</sup>H NMR (400 MHz, DMSO-*d*<sub>6</sub>) δ: 10.61 (s, 1H, NH), 8.74 (s, 1H, NH), 7.20 (s, 2H, NH<sub>2</sub>), 7.18 (brs, 4H, ArH), 5.29-5.26 (m, 1H, CH), 4.51 (d, *J* = 2.8 Hz, 1H, CH), 4.34-4.31 (m, 1H, CH), 4.16-4.11 (m, 2H, CH), 4.08 (s, 1H, OH), 3.83-3.78 (m, 1H, CH), 3.70-3.67 (m, 1H, CH), 2.29 (s, 3H, CH<sub>3</sub>), 1.20 (t, *J* = 6.8 Hz, 3H, CH<sub>3</sub>); <sup>13</sup>C NMR (100 MHz, DMSO-*d*<sub>6</sub>) δ: 172.2, 170.6, 161.9, 153.1, 138.8, 137.1, 129.7, 127.4, 118.6, 109.9, 70.8, 61.5, 61.2, 55.6, 55.2, 51.8, 51.7, 21.0, 14.5; IR (KBr) ν: 3409, 3358, 3293, 3107, 3093, 2977, 2208, 1764, 1651, 1594, 1546, 1388, 1245, 1280, 1138, 1027, 957, 816 cm<sup>-1</sup>; MS (*m/z*): HRMS (ESI) Calcd. for C<sub>19</sub>H<sub>20</sub>NaN<sub>4</sub>O<sub>5</sub>S ([M+Na]<sup>+</sup>): 441.1203, found: 441.1188.

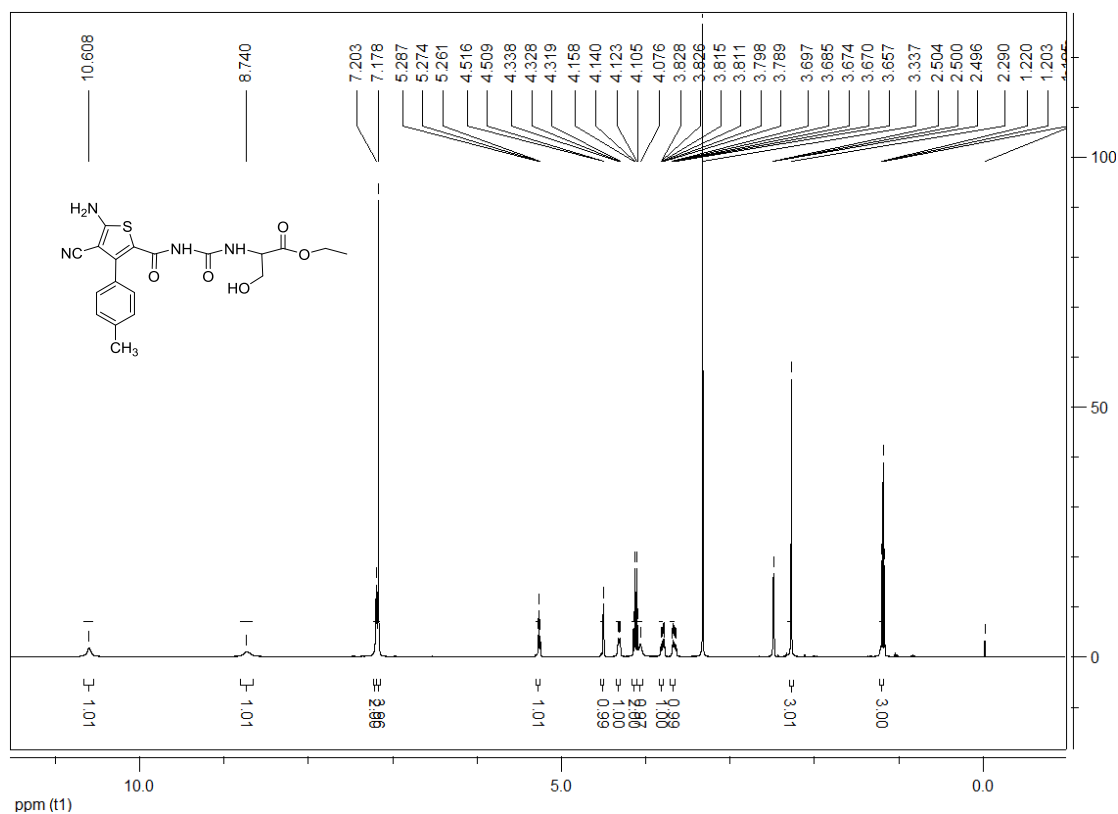

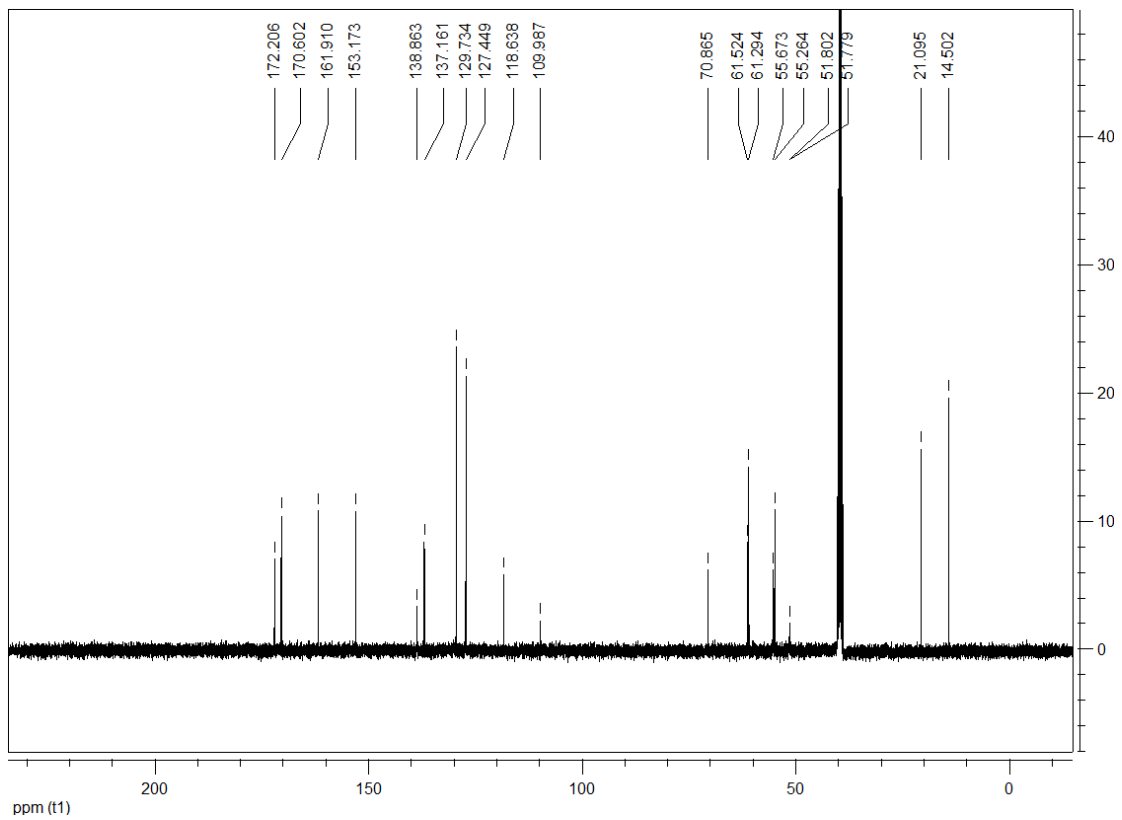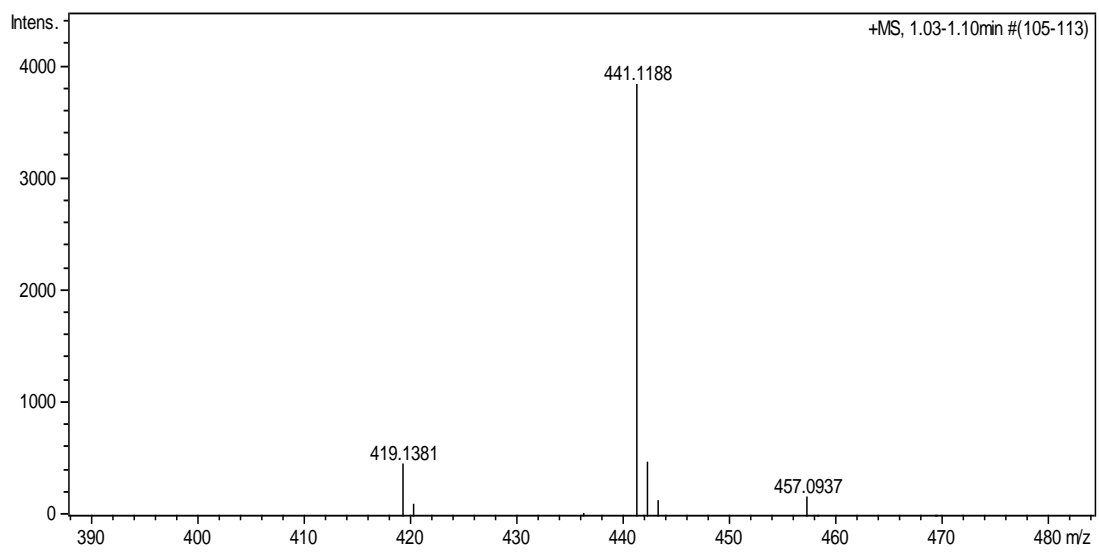

## Ethyl

**2-(3-(5-amino-4-cyano-3-(4-methoxyphenyl)-2,3-dihydrothiophene-2-carbonyl)ureido)-3-methylpentanoate (2d)**: yellow solid, 68%, m.p. 188-190°C; <sup>1</sup>H NMR (400 MHz, DMSO-*d*<sub>6</sub>) δ: 10.60 (s, 1H, NH), 8.58 (s, 1H, NH), 7.22 (d, *J* = 8.4 Hz, 2H, ArH), 7.17 (s, 2H, NH<sub>2</sub>), 6.92 (d, *J* = 8.4 Hz, 2H, ArH), 4.51-4.50 (m, 1H, CH), 4.28-4.25 (m, 1H, CH), 4.20-4.06 (m, 3H, CH), 3.75 (s, 3H, OCH<sub>3</sub>), 1.89-1.86 (m, 1H, CH), 1.44-1.37 (m, 1H, CH), 1.26-1.24 (m, 1H, CH), 1.21 (t, *J* = 7.2 Hz, 3H, CH<sub>3</sub>), 0.91-0.88 (m, 6H, CH<sub>3</sub>); <sup>13</sup>C NMR (100 MHz, DMSO-*d*<sub>6</sub>) δ: 172.7, 171.3, 161.7, 159.1, 153.2, 133.7, 128.6, 118.6, 114.5, 71.2, 61.2, 57.0, 55.8, 55.5, 51.3, 37.3, 25.2, 15.9, 14.4, 11.7; IR (KBr) ν: 3323, 3227, 2967, 2186, 1701, 1635, 1580, 1544, 1511, 1346, 1250, 1181, 1028, 831 cm<sup>-1</sup>; MS (*m/z*): HRMS (ESI) Calcd. for C<sub>22</sub>H<sub>28</sub>N<sub>4</sub>O<sub>5</sub>S ([M+H]<sup>+</sup>): 461.1780, found: 461.1848.

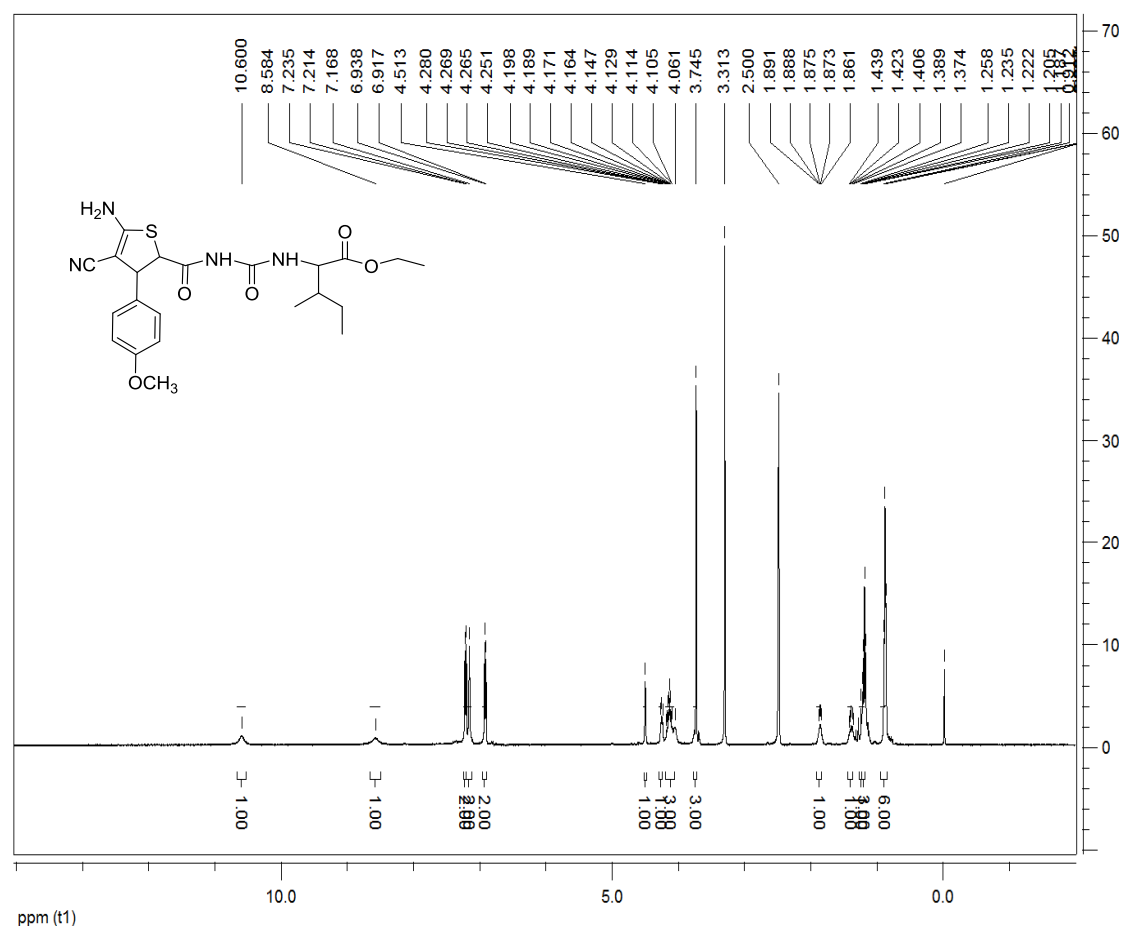

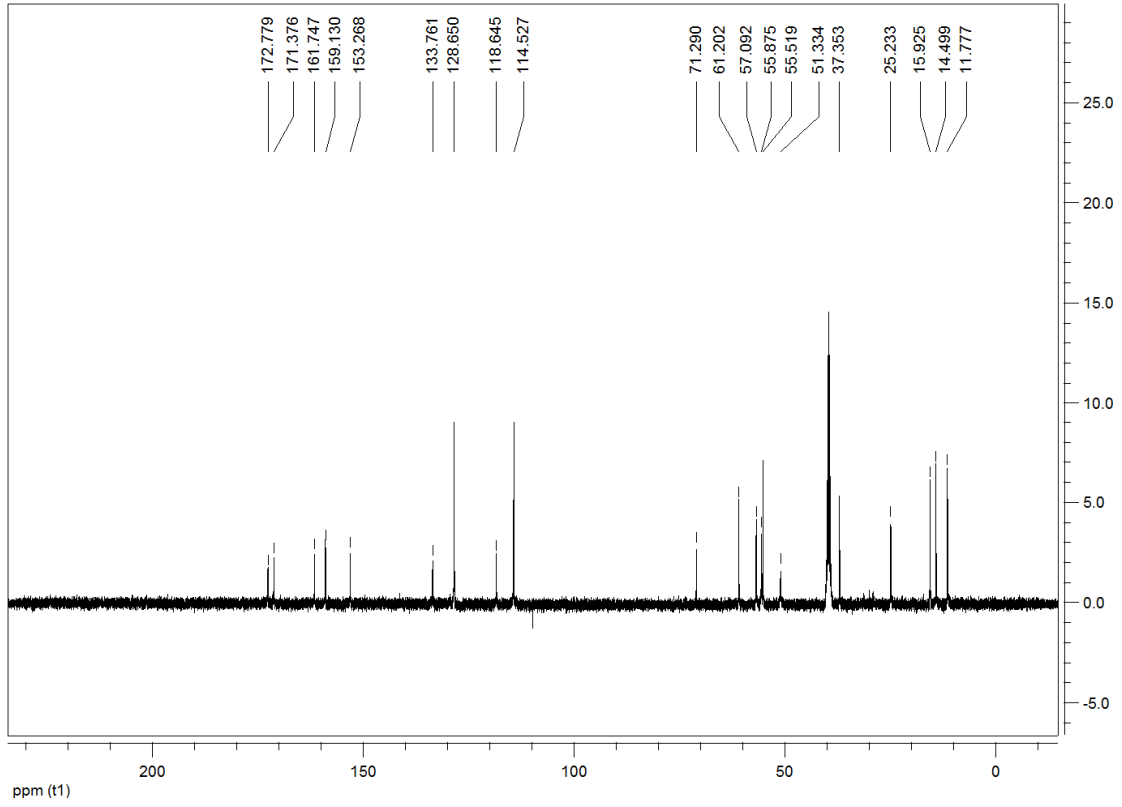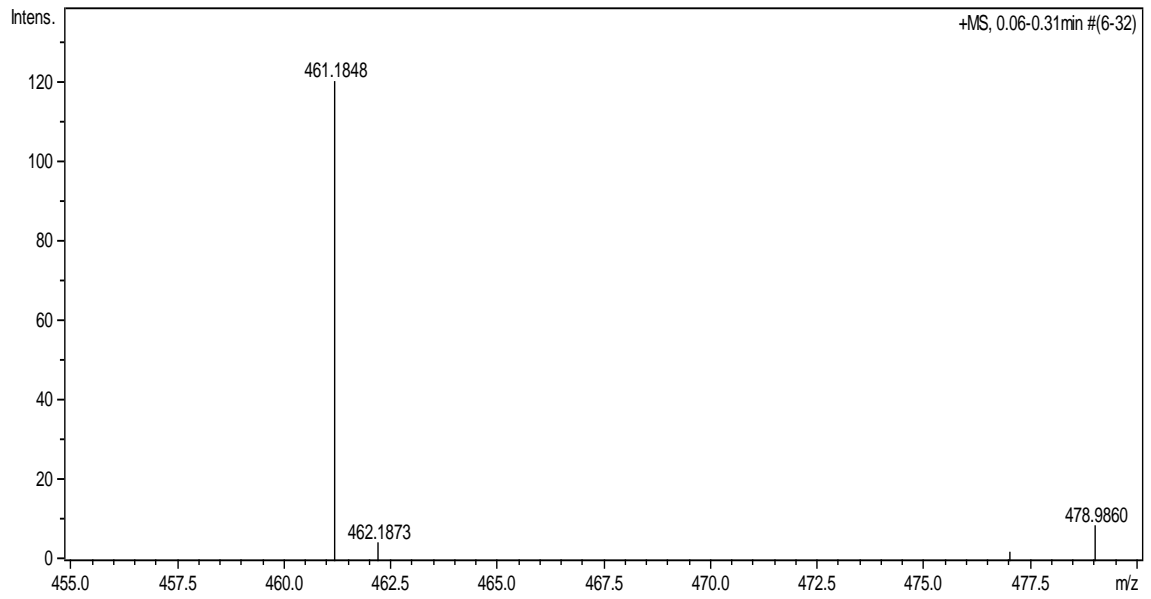

## Ethyl

**2-(3-(5-amino-4-cyano-3-(p-tolyl)-2,3-dihydrothiophene-2-carbonyl)ureido)-3-methylpentanoate (2e)**: yellow solid, 64%, m.p. 190-192°C; <sup>1</sup>H NMR (400 MHz, DMSO-*d*<sub>6</sub>) δ: 10.60 (s, 1H, NH), 8.57 (s, 1H, NH), 7.17-7.08 (m, 6H, ArH, NH<sub>2</sub>), 4.52 (s, 1H, CH), 4.26 (s, 1H, CH), 4.15-4.07 (m, 3H, CH), 2.29-2.23 (m, 3H, CH<sub>3</sub>), 1.87 (s, 1H, CH), 1.40 (m, 1H, CH), 1.22-1.18 (m, 3H, CH<sub>3</sub>), 1.16-1.11 (m, 1H, CH), 0.89-0.80 (m, 6H, CH<sub>3</sub>); <sup>13</sup>C NMR (100 MHz, DMSO-*d*<sub>6</sub>) δ: 172.5, 172.0, 163.0, 152.8, 148.4, 144.1, 134.5, 130.7, 123.0, 122.3, 118.3, 69.9, 61.2, 55.4, 50.9, 48.6, 18.0, 14.4; IR (KBr) ν: 3447, 3329, 3225, 2968, 2376, 2339, 2186, 1702, 1634, 1544, 1474, 1349, 1195, 1149, 1023, 859, 810 cm<sup>-1</sup>; MS (*m/z*): HRMS (ESI) Calcd. for C<sub>22</sub>H<sub>28</sub>N<sub>4</sub>O<sub>4</sub>SNa ([M+Na]<sup>+</sup>): 485.2071, found: 467.1735.

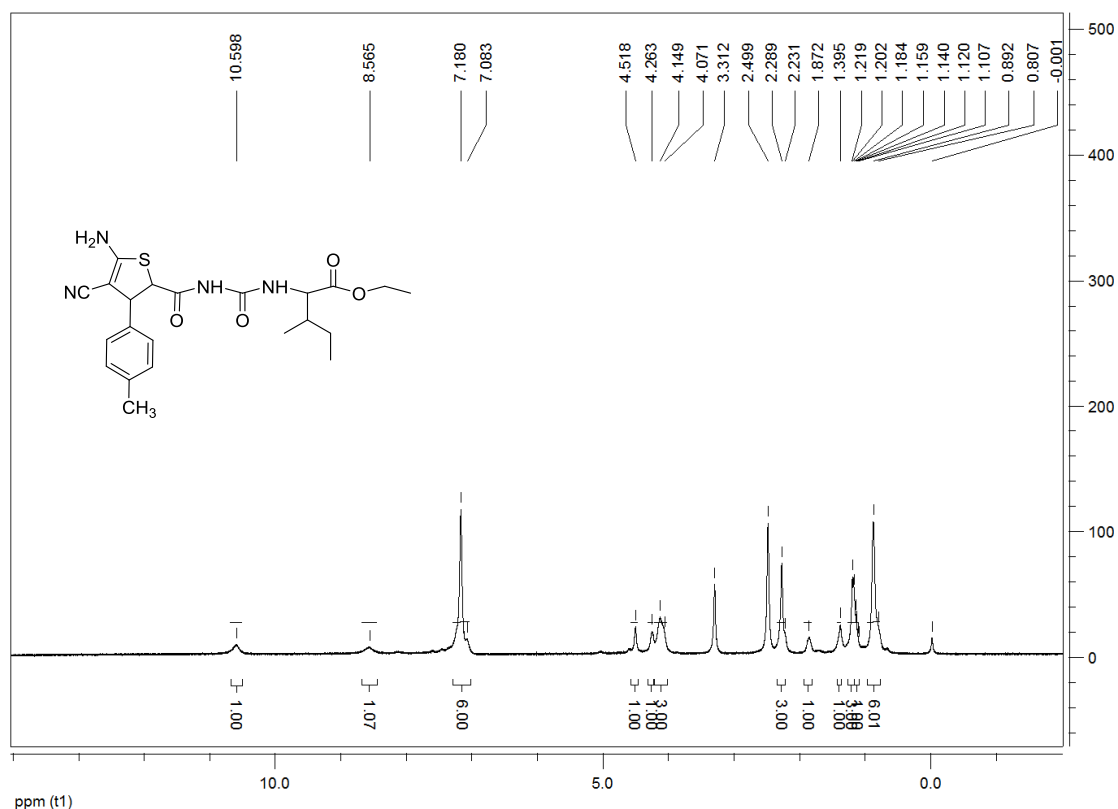

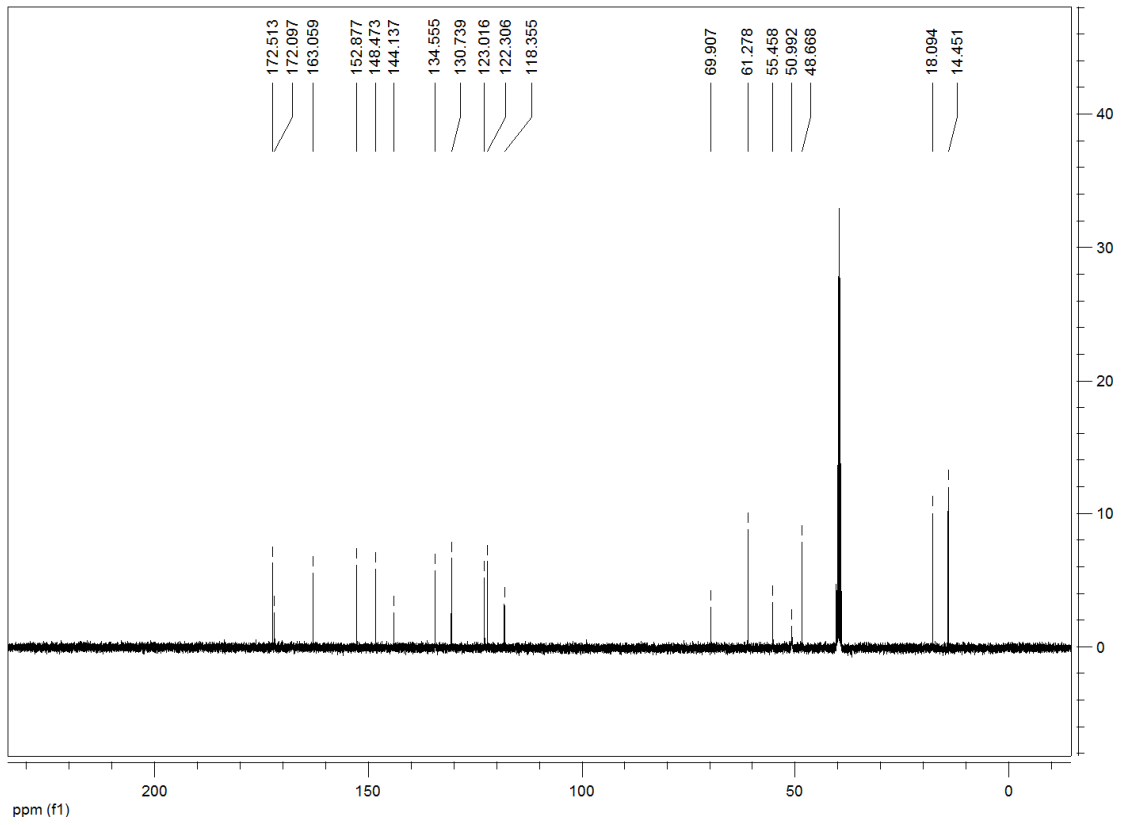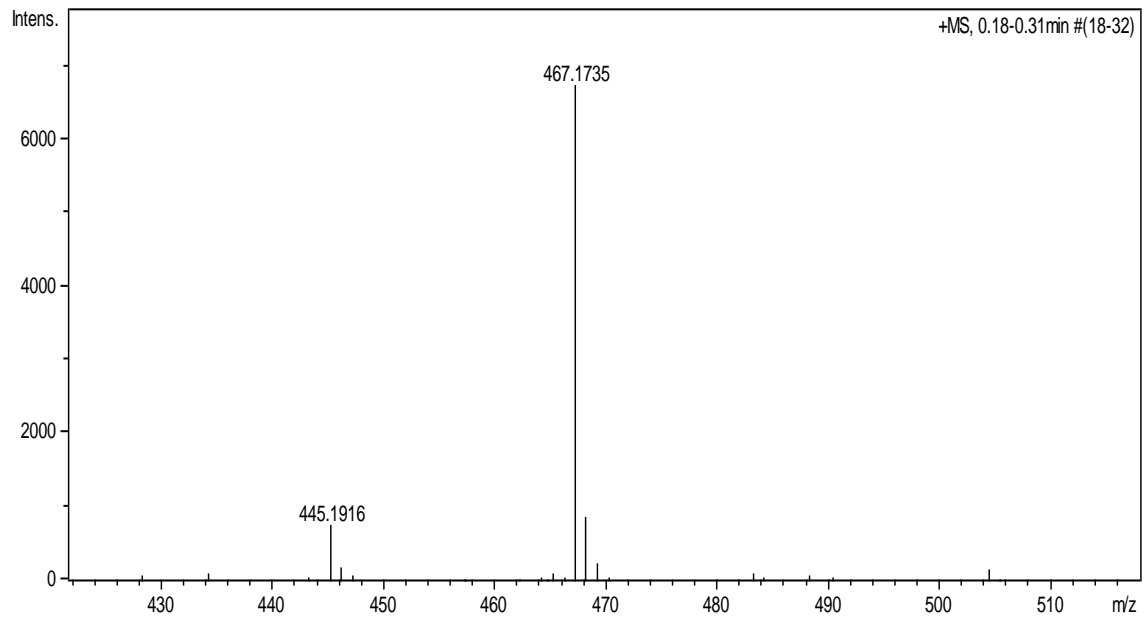

## Ethyl

### ((5-amino-4-cyano-3-phenyl-2,3-dihydrothiophene-2-carbonyl)carbamoyl)phenylalaninate

(**2f**): yellow solid, 48%, m.p. 185-187°C; <sup>1</sup>H NMR (400 MHz, DMSO-d<sub>6</sub>) δ: 10.55 (s, 1H, NH), 8.48 (s, 1H, NH), 7.39-7.35 (m, 2H, ArH), 7.33-7.29 (m, 5H, ArH), 7.25 (d, *J* = 7.2 Hz, 1H, ArH), 7.21-7.17 (m, 4H, ArH, NH<sub>2</sub>), 4.58-4.53 (m, 2H, CH), 4.12-4.06 (m, 3H, CH), 3.12-3.04 (m, 2H, CH), 1.15 (t, *J* = 6.8 Hz, 3H, CH<sub>3</sub>); <sup>13</sup>C NMR (100 MHz, DMSO-d<sub>6</sub>) δ: 172.2, 171.2, 162.0, 152.9, 141.9, 136.7, 129.6, 129.1, 128.8, 127.9, 127.5, 127.2, 118.6, 70.8, 61.3, 55.6, 54.3, 54.2, 51.9, 37.4, 14.3; IR (KBr) ν: 3414, 3302, 3220, 3079, 2974, 2182, 1751, 1688, 1631, 1591, 1555, 1503, 1453, 1345, 1301, 1247, 1202, 1107, 1040, 975, 856, 813 cm<sup>-1</sup>; MS (*m/z*): HRMS (ESI) Calcd. for C<sub>24</sub>H<sub>24</sub>N<sub>4</sub>O<sub>4</sub>S ([M+Na]<sup>+</sup>): 487.1518, found: 487.1412.

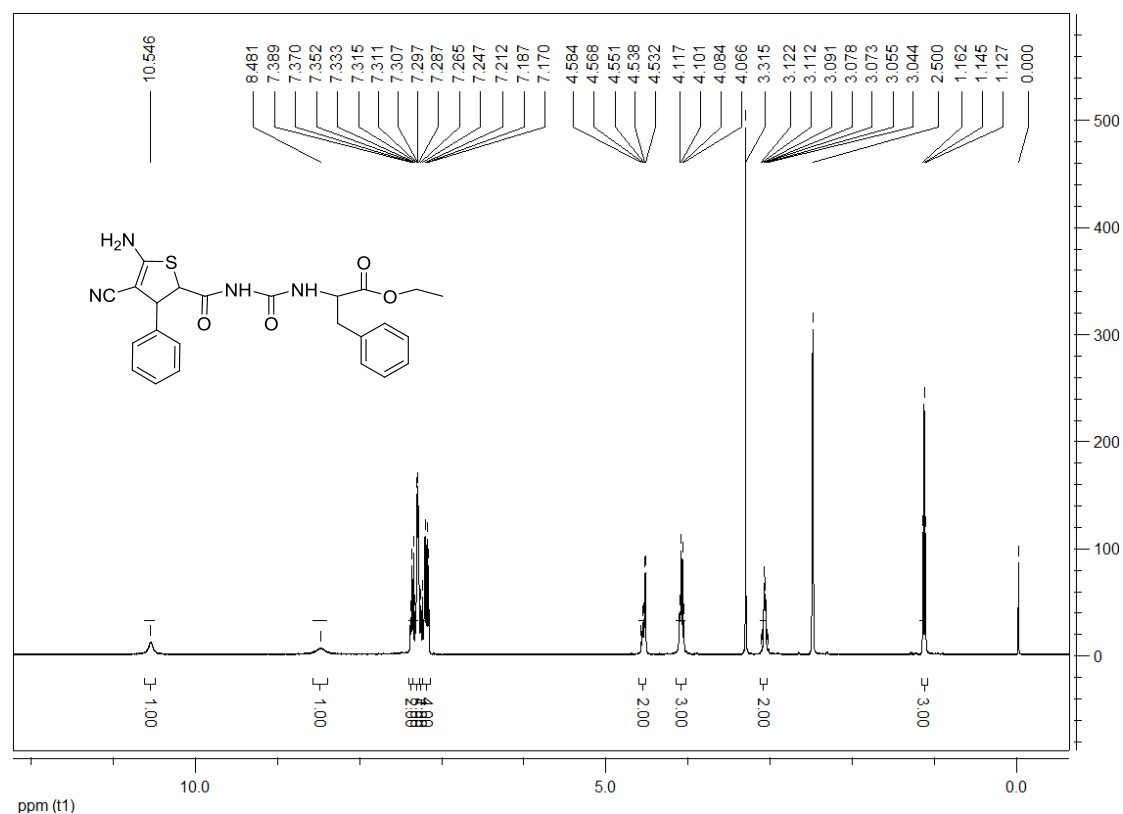

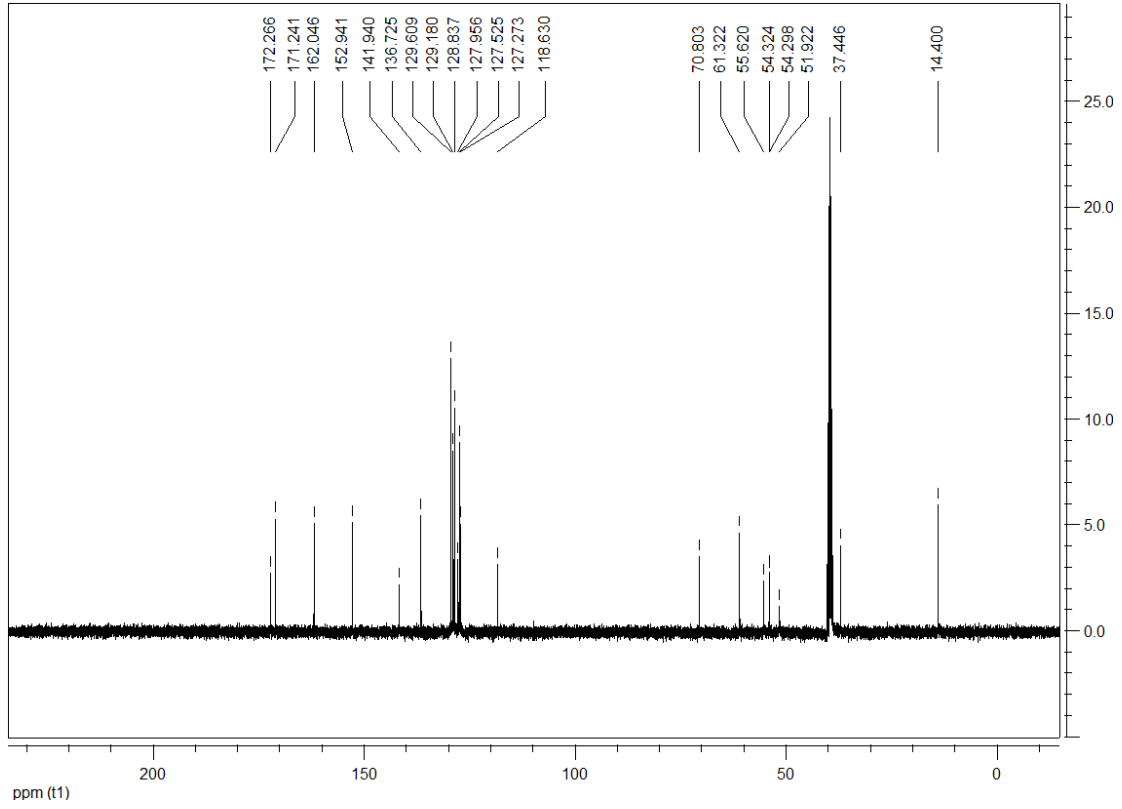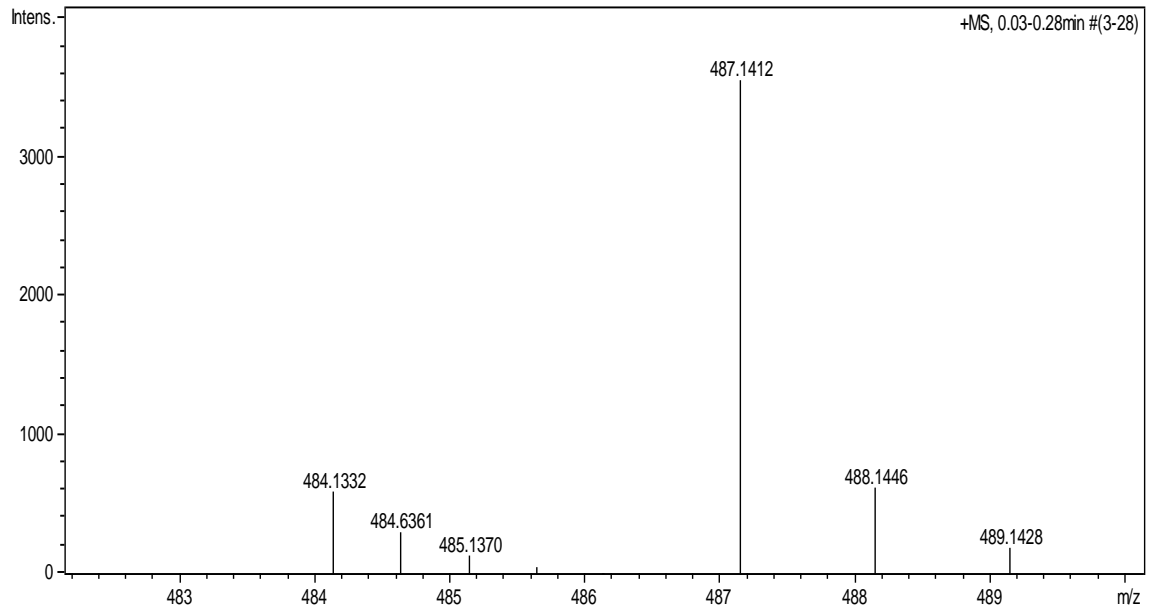



ethyl

**((5-amino-4-cyano-3-(4-methoxyphenyl)-2,3-dihydrothiophene-2-carbonyl)carbamoyl)phenylalaninate (2g):** yellow solid, 62%, m.p. 163-165 °C; <sup>1</sup>H NMR (400 MHz, DMSO-*d*<sub>6</sub>) δ: 10.56 (s, 1H, NH), 8.50 (s, 1H, NH), 7.33-7.30 (m, 2H, ArH), 7.27-7.24 (m, 1H, ArH), 7.21-7.17 (m, 6H, ArH, NH<sub>2</sub>), 6.94-6.91 (m, 2H, ArH), 4.58-4.53 (m, 1H, CH), 4.49-4.46 (m, 1H, CH), 4.13-4.04 (m, 3H, CH), 3.75 (s, 3H, OCH<sub>3</sub>), 3.11-3.04 (m, 2H, CH), 1.15 (t, *J* = 7.2 Hz, 3H, CH<sub>3</sub>); *dr*-isomer: 3.74 (s, 3H, OCH<sub>3</sub>), 1.14 (t, *J* = 7.2 Hz, 3H, CH<sub>3</sub>). *dr*-ratio = 0.53:0.47. <sup>13</sup>C NMR (100 MHz, DMSO-*d*<sub>6</sub>) δ: 172.2, 171.2, 171.1, 161.7, 161.6, 159.1, 152.9, 152.8, 136.7, 136.6, 133.7, 133.6, 129.6, 128.8, 128.6, 127.2, 118.6, 114.5, 71.1, 61.3, 55.8, 55.7, 55.5, 54.3, 54.2, 51.4, 51.3, 51.2, 37.4, 37.3, 14.4; IR (KBr) ν: 3444, 3315, 3220, 3145, 2967, 2838, 2179, 1747, 1693, 1623, 1580, 1540, 1502, 1349, 1302, 1250, 1182, 1117, 1034, 977, 886, 828 cm<sup>-1</sup>; MS (*m/z*): HRMS (ESI) Calcd. for C<sub>25</sub>H<sub>26</sub>N<sub>4</sub>O<sub>5</sub>S ([M+H]<sup>+</sup>): 495.1624, found: 495.1692.

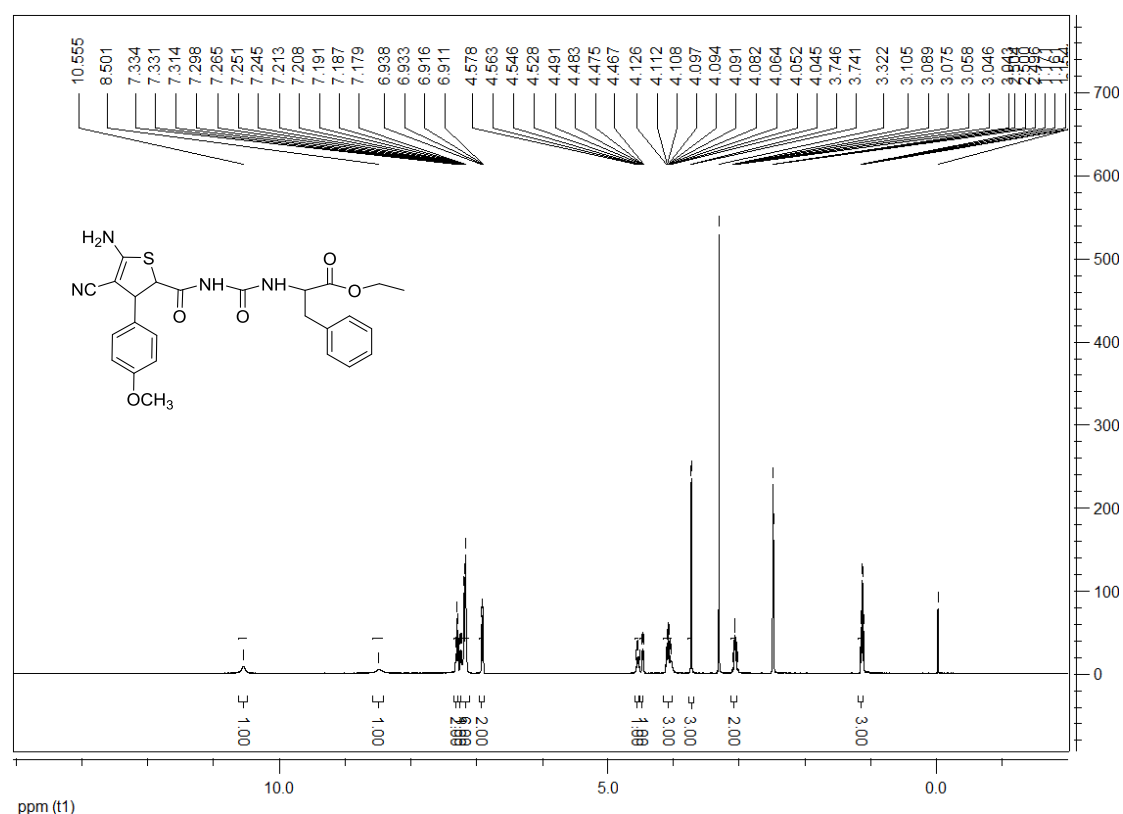

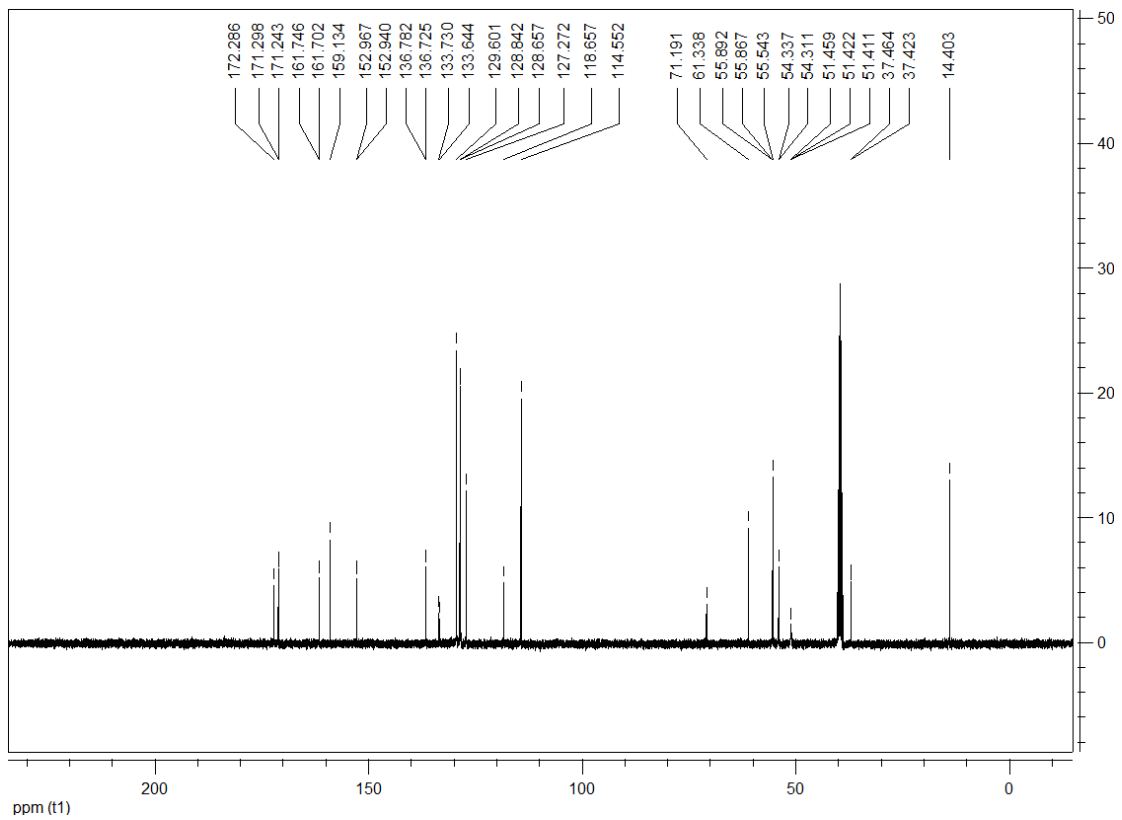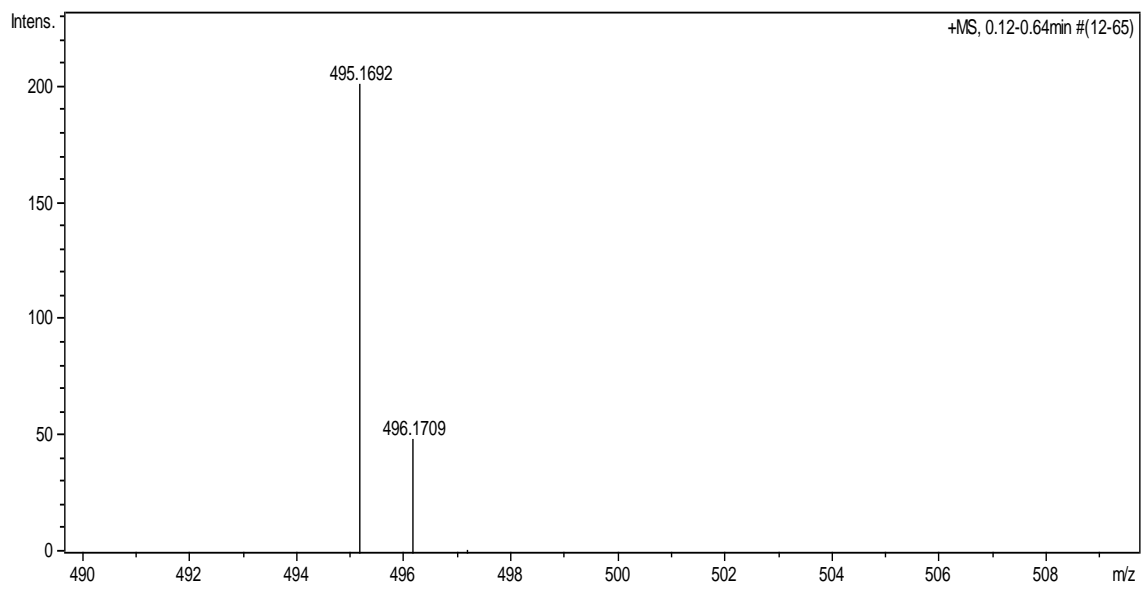

## Ethyl

### ((5-amino-4-cyano-3-(3-methoxyphenyl)-2,3-dihydrothiophene-2-carbonyl)carbamoyl)phenyl

alaninate (**2h**): yellow solid, 60%, m.p. 183-185°C; <sup>1</sup>H NMR (400 MHz, DMSO-*d*<sub>6</sub>) δ: 10.55 (s, 1H, NH), 8.50 (s, 1H, NH), 7.33-7.30 (m, 4H, ArH), 7.21-7.17 (m, 4H, ArH, NH<sub>2</sub>), 6.89-6.86 (m, 3H, ArH), 4.60-4.55 (m, 1H, CH), 4.51-4.49 (m, 1H, CH), 4.13-4.07 (m, 3H, CH), 3.75 (s, 3H, OCH<sub>3</sub>), 3.11-3.06 (m, 2H, CH), 1.15 (t, *J* = 7.2 Hz, 3H, CH<sub>3</sub>); *dr*-isomer: 3.74 (s, 3H, OCH<sub>3</sub>), 1.14 (t, *J* = 7.2 Hz, 3H, CH<sub>3</sub>). *dr*-ratio = 0.51:0.49. <sup>13</sup>C NMR (100 MHz, DMSO-*d*<sub>6</sub>) δ: 172.2, 172.1, 171.3, 171.2, 162.1, 162.0, 159.9, 153.0, 152.9, 143.5, 143.4, 136.7, 136.6, 130.2, 129.6, 129.5, 128.8, 127.2, 119.5, 118.6, 113.5, 113.0, 70.6, 70.5, 61.3, 61.2, 55.5, 55.4, 55.3, 54.3, 54.2, 54.1, 51.8, 51.7, 37.4, 37.3, 14.4; IR (KBr) ν: 3439, 3305, 3221, 3146, 2964, 2835, 2181, 1750, 1695, 1627, 1585, 1539, 1492, 1348, 1303, 1246, 1184, 1044, 975, 868 cm<sup>-1</sup>; MS (*m/z*): HRMS (ESI) Calcd. for C<sub>25</sub>H<sub>26</sub>N<sub>4</sub>O<sub>5</sub>S ([M+H]<sup>+</sup>): 495.1624, found: 495.1699.

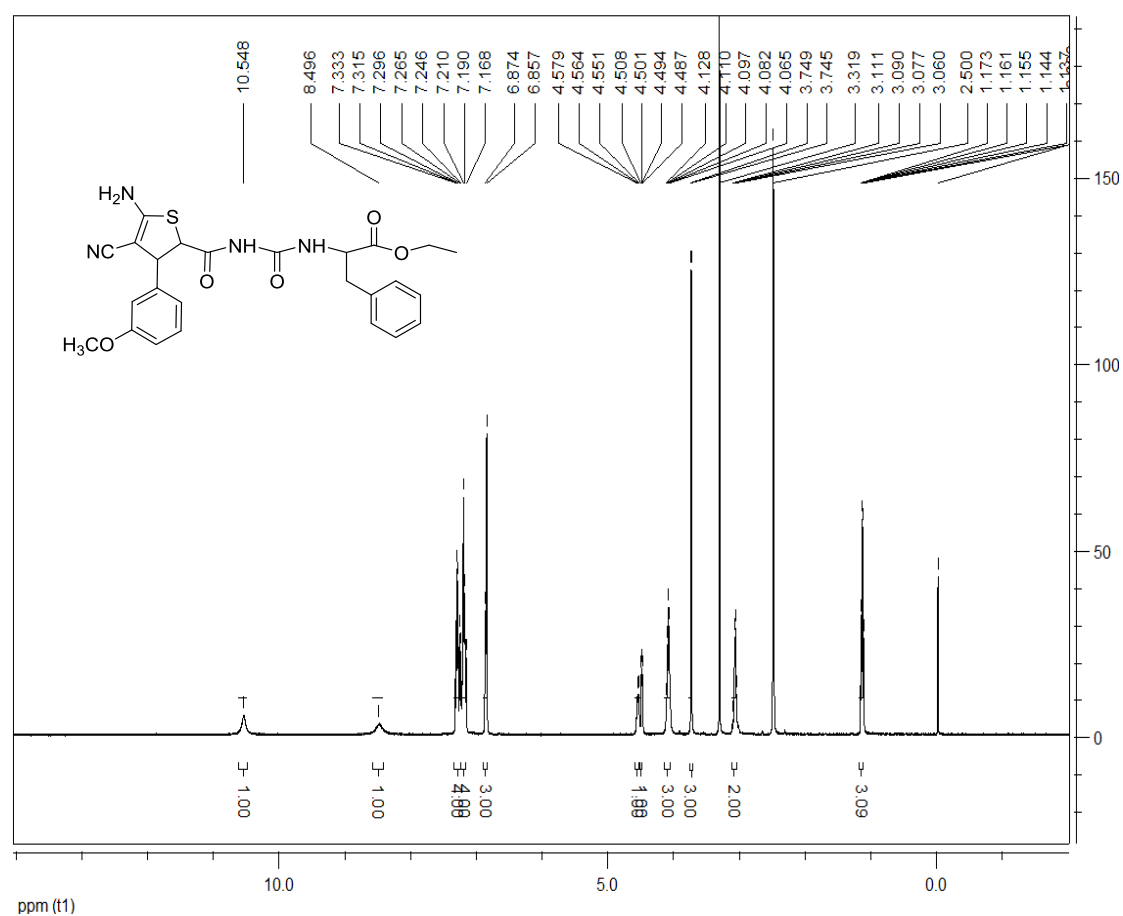

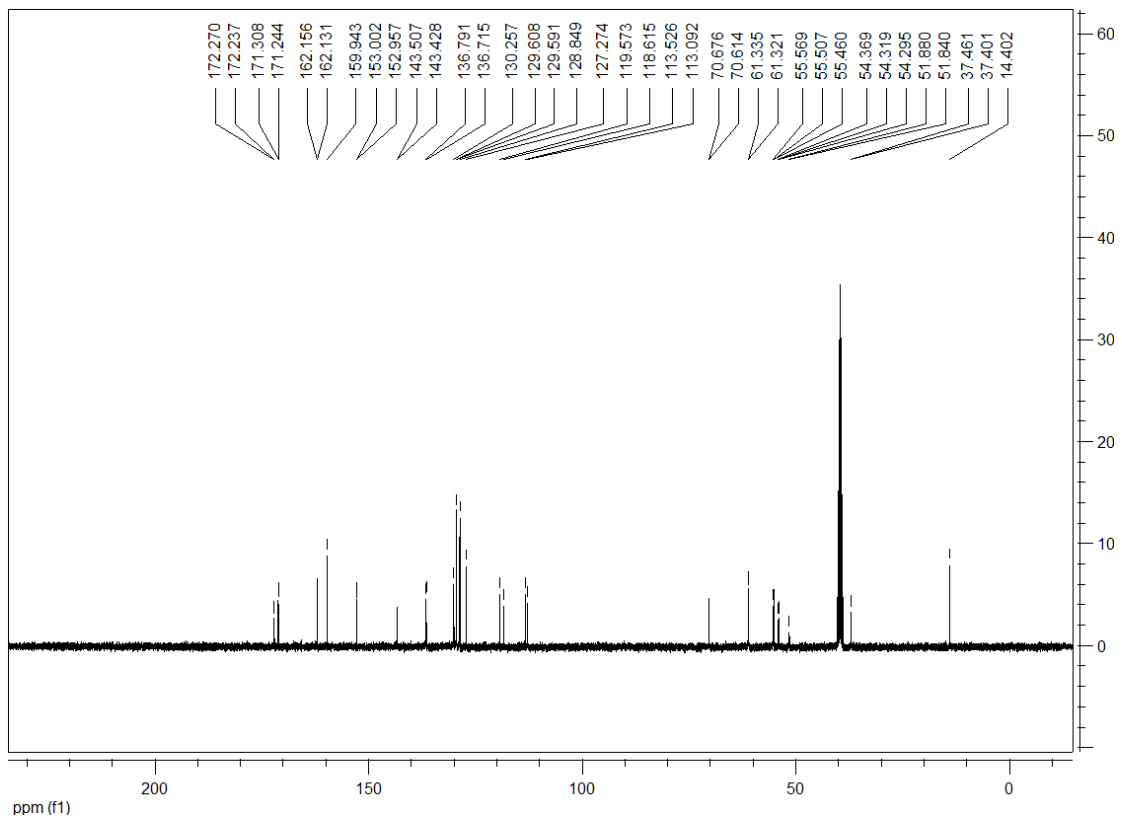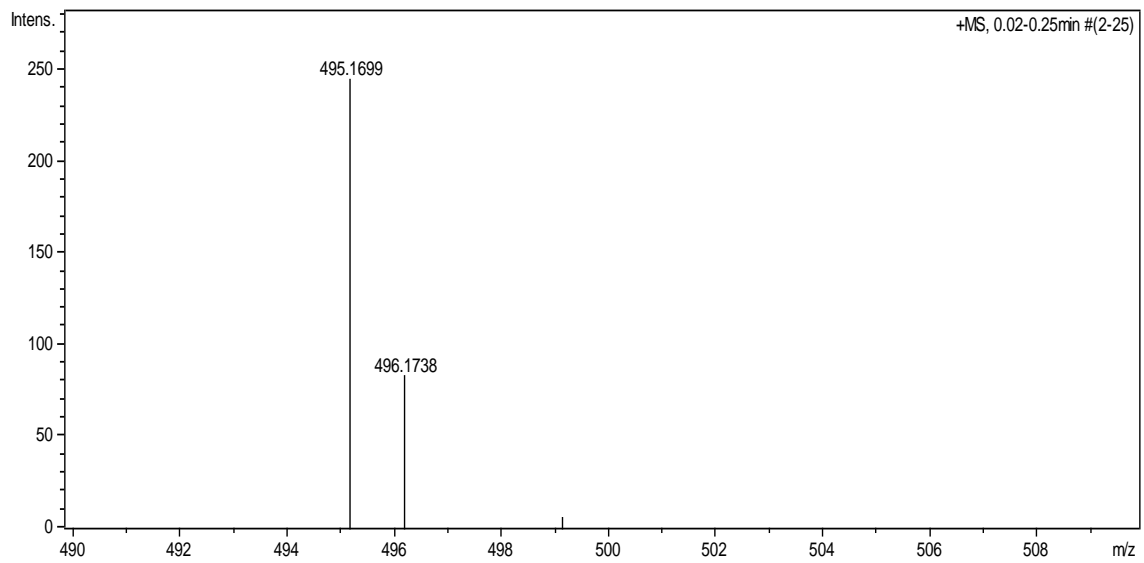

ethyl

**((5-amino-4-cyano-3-(2-methoxyphenyl)-2,3-dihydrothiophene-2-carbonyl)carbamoyl)phenyl**

**lalaninate (2i)**: yellow solid, 56%, m.p. 187-189 °C;  $^1\text{H}$  NMR (400 MHz,  $\text{DMSO-}d_6$ )  $\delta$ : 10.51 (s, 1H, NH), 8.54 (s, 1H, NH), 7.34-7.19 (m, 8H, ArH,  $\text{NH}_2$ ), 7.13 (d,  $J = 7.2$  Hz, 1H, ArH) 7.05-6.97 (m, 2H, ArH), 4.79 (s, 1H, CH), 4.57 (s, 1H, CH), 4.14-4.09 (m, 2H, CH), 3.89 (s, 1H, CH), 3.76 (s, 3H,  $\text{OCH}_3$ ), 3.16-3.06 (m, 2H, CH), 1.17 (t,  $J = 6.8$  Hz, 3H,  $\text{CH}_3$ ); *dr*-isomer: 3.74 (s, 3H,  $\text{OCH}_3$ ), 1.16 (t,  $J = 6.8$  Hz, 3H,  $\text{CH}_3$ ). *dr*-ratio = 0.51:0.49.  $^{13}\text{C}$  NMR (100 MHz,  $\text{DMSO-}d_6$ )  $\delta$ : 172.8, 172.7, 172.6, 171.2, 162.6, 156.6, 153.0, 152.9, 136.8, 136.7, 129.6, 129.1, 129.0, 128.8, 128.7, 127.2, 127.1, 120.8, 118.6, 111.5, 68.1, 61.3, 61.2, 56.0, 55.9, 54.5, 54.4, 54.3, 45.9, 37.3, 14.4; IR (KBr)  $\nu$ : 3408, 3315, 3229, 2966, 2839, 2174, 1736, 1697, 1638, 1584, 1535, 1493, 1354, 1247, 1187, 1108, 1026, 982, 892, 854  $\text{cm}^{-1}$ ; MS ( $m/z$ ): HRMS (ESI) Calcd. for  $\text{C}_{25}\text{H}_{26}\text{N}_4\text{O}_5\text{S}$  ( $[\text{M}+\text{H}]^+$ ): 495.1624, found: 495.1699.

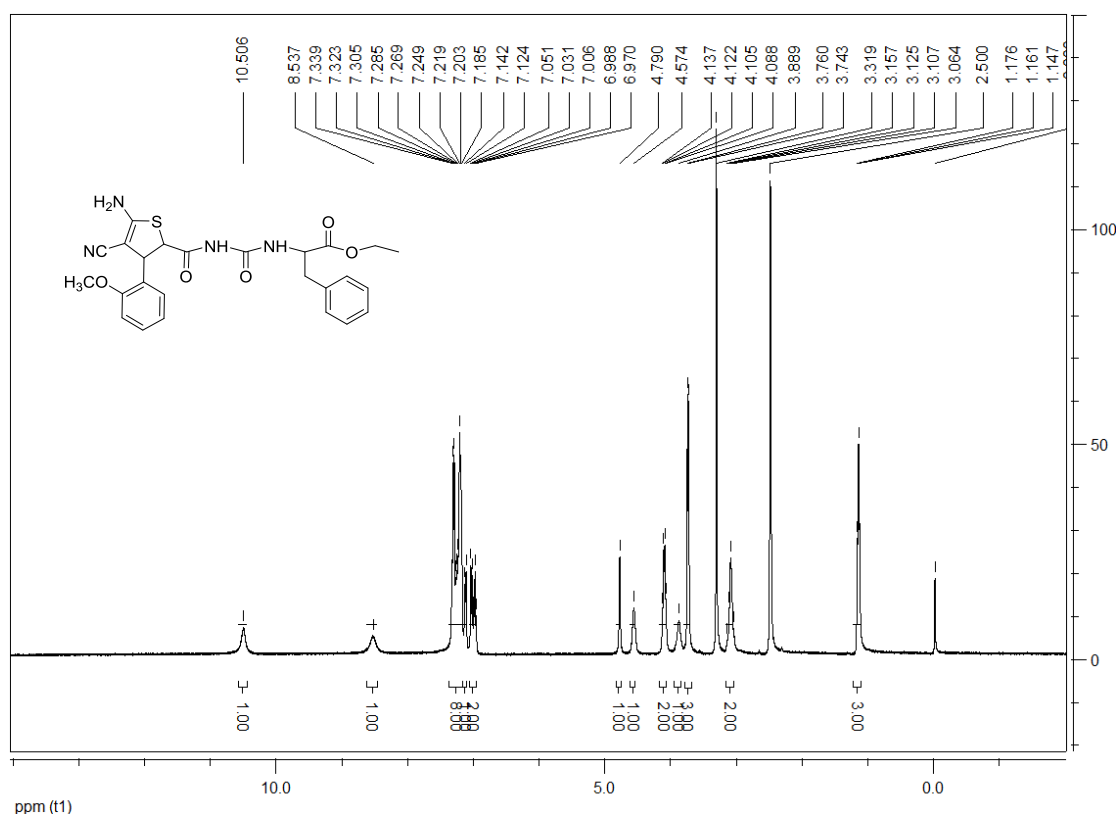

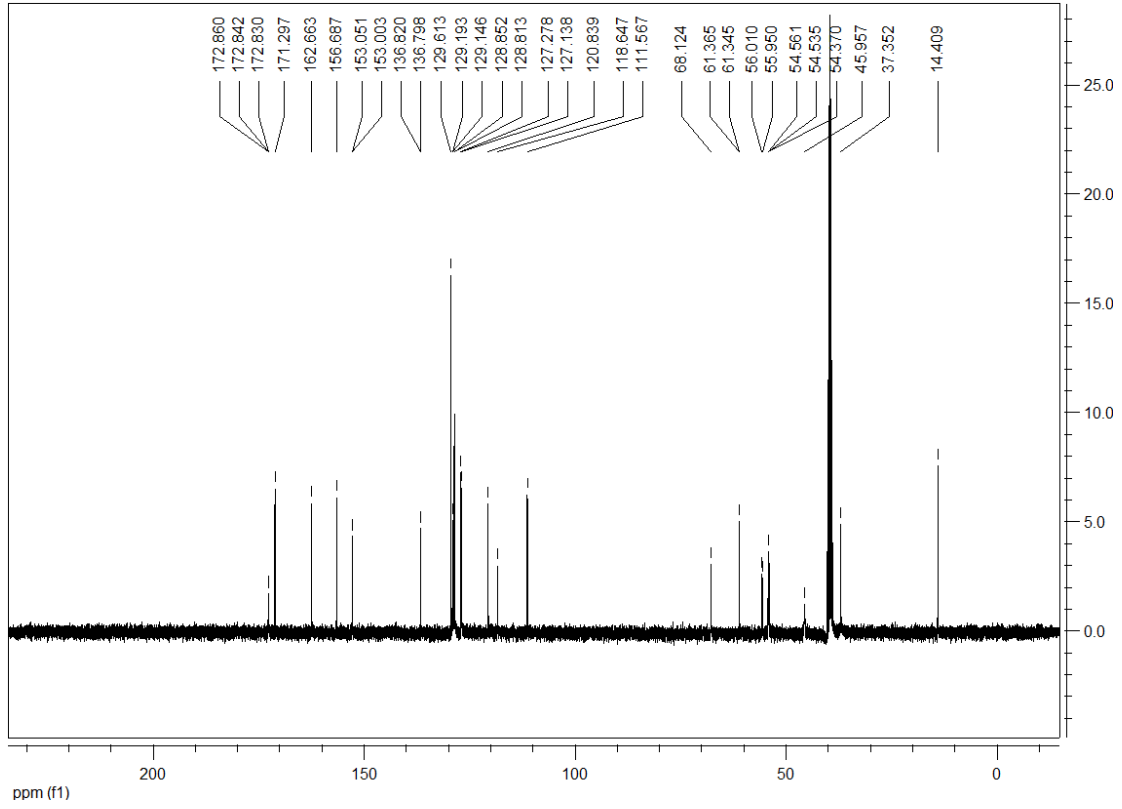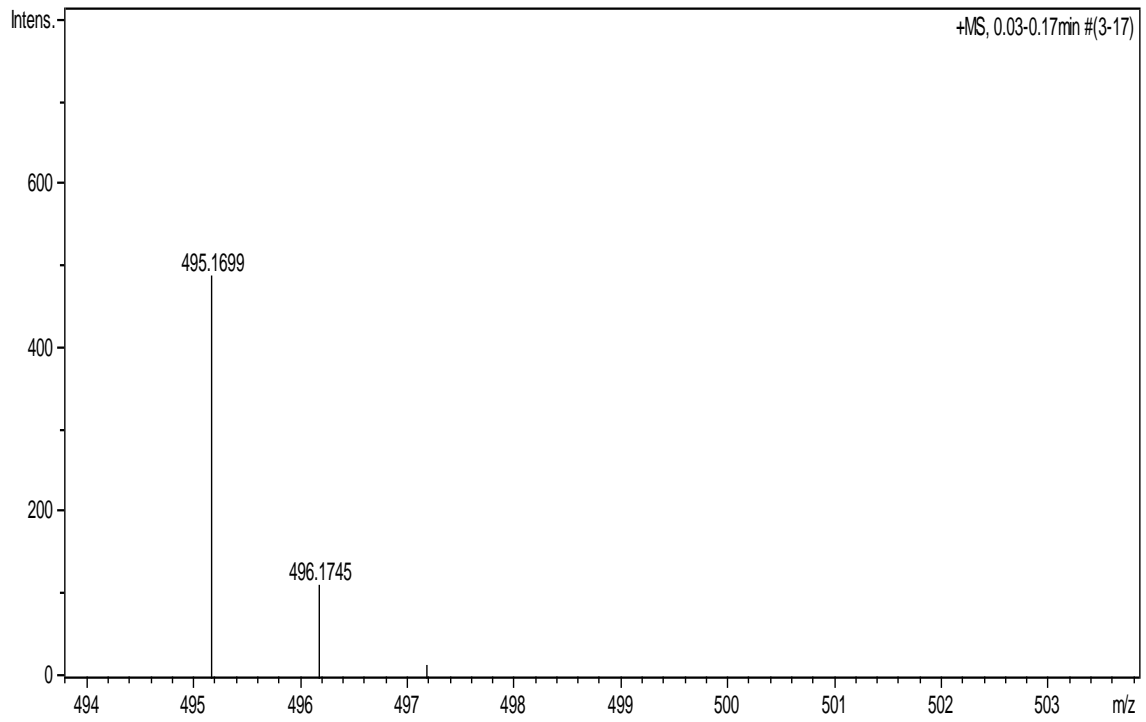

ethyl

**((5-amino-4-cyano-3-(p-tolyl)-2,3-dihydrothiophene-2-carbonyl)carbamoyl)phenylalaninate**

**(2j)**: yellow solid, 55%, m.p. 180-182°C; <sup>1</sup>H NMR (400 MHz, DMSO-*d*<sub>6</sub>) δ: 10.56 (s, 1H, NH), 8.49 (s, 1H, NH), 7.33-7.30 (m, 2H, ArH), 7.27-7.25 (m, 1H, ArH), 7.23-7.17 (m, 8H, ArH, NH<sub>2</sub>), 4.58-4.53 (m, 1H, CH), 4.50-4.47 (m, 1H, CH), 4.13-4.06 (m, 3H, CH), 3.12-3.06 (m, 2H, CH), 2.88 (s, 3H, CH<sub>3</sub>), 1.15 (t, *J* = 6.8 Hz, 3H, CH<sub>3</sub>); *dr*-isomer: 2.89 (s, 3H, CH<sub>3</sub>), 1.14 (t, *J* = 6.8 Hz, 3H, CH<sub>3</sub>). *dr*-ratio = 0.52:0.48. <sup>13</sup>C NMR (100 MHz, DMSO-*d*<sub>6</sub>) δ: 172.2, 171.2, 171.1, 161.8, 161.7, 152.9, 152.9, 138.8, 138.7, 137.1, 136.7, 136.6, 129.7, 129.6, 128.8, 127.4, 127.2, 118.6, 70.9, 70.8, 61.3, 55.7, 55.6, 54.3, 54.2, 51.6, 51.5, 37.4, 37.3, 21.0, 14.3; IR (KBr) ν: 3439, 3313, 3221, 3149, 3031, 2972, 2178, 1750, 1695, 1628, 1583, 1539, 1494, 1348, 1246, 1184, 1119, 1034, 975, 887 cm<sup>-1</sup>; MS (*m/z*): HRMS (ESI) Calcd. for C<sub>25</sub>H<sub>26</sub>N<sub>4</sub>NaO<sub>4</sub>S ([M+Na]<sup>+</sup>): 501.1567, found: 501.1569.

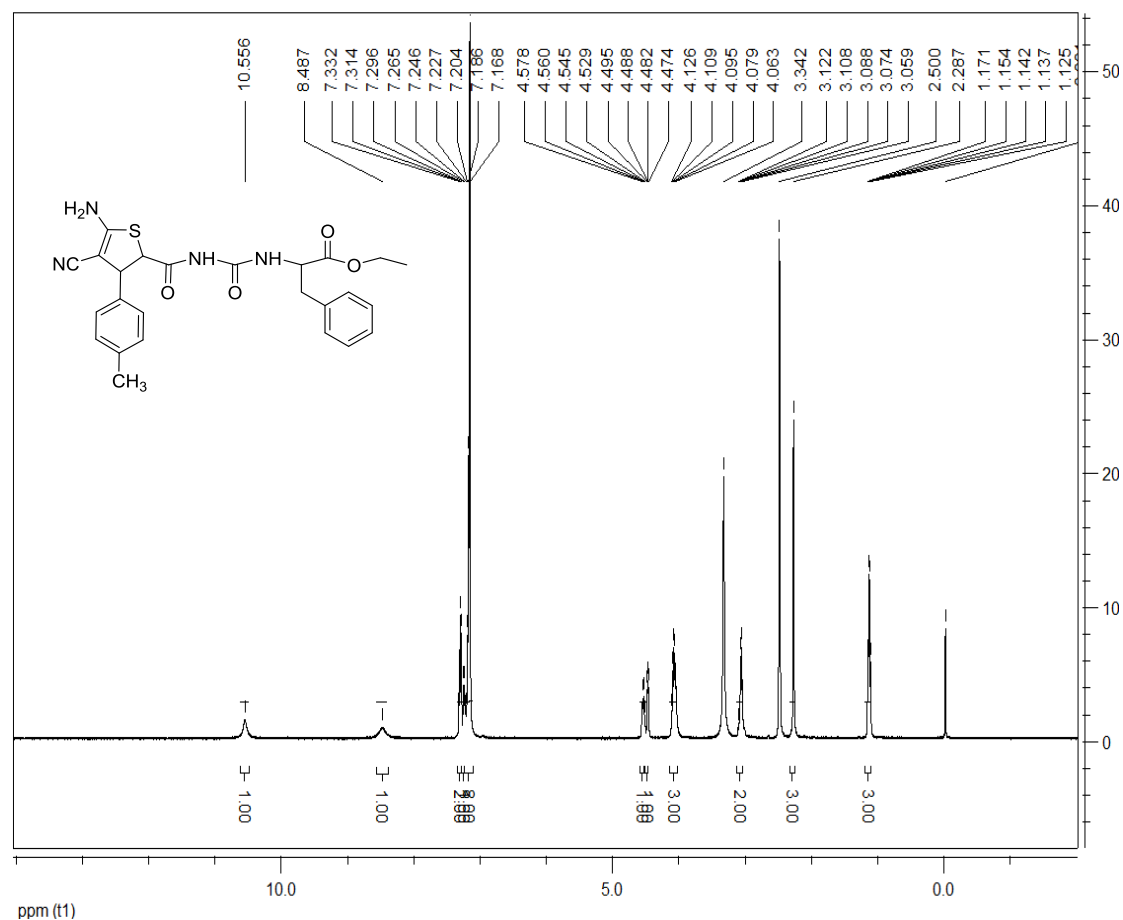

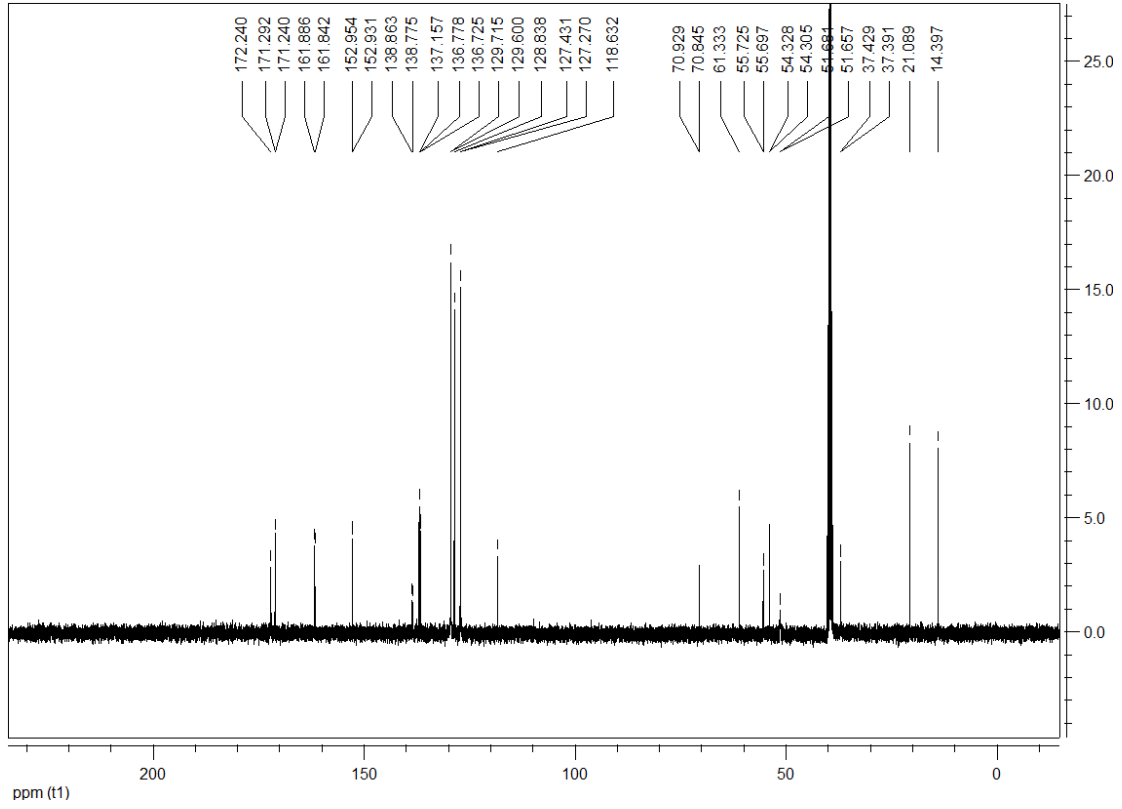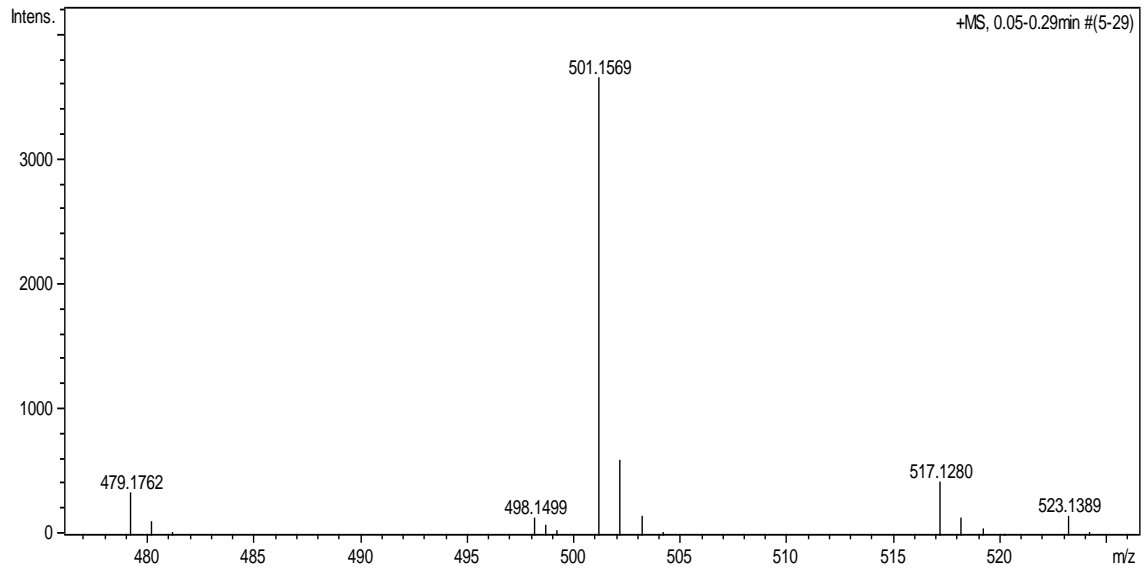



## Ethyl

**((5-amino-3-(4-chlorophenyl)-4-cyano-2,3-dihydrothiophene-2-carbonyl)carbamoyl)phenylalaninate (2k):** yellow solid, 53%, m.p. 180-182 °C;  $^1\text{H}$  NMR (400 MHz,  $\text{DMSO-}d_6$ )  $\delta$ : 10.56 (s, 1H, NH), 8.48 (s, 1H, NH), 7.44 (d,  $J = 7.6$  Hz, 2H, ArH), 7.33-7.25 (m, 7H, ArH,  $\text{NH}_2$ ), 7.21-7.17 (m, 2H, ArH), 4.57-4.52 (m, 2H, CH), 4.13-4.06 (m, 3H, CH), 3.09-3.08 (m, 2H, CH), 1.15 (t,  $J = 7.2$  Hz, 3H,  $\text{CH}_3$ ); *dr*-isomer: 1.14 (t,  $J = 7.2$  Hz, 3H,  $\text{CH}_3$ ). *dr*-ratio = 0.53:0.47.  $^{13}\text{C}$  NMR (100 MHz,  $\text{DMSO-}d_6$ )  $\delta$ : 172.1, 172.0, 171.3, 171.2, 162.3, 162.2, 153.0, 152.9, 140.9, 140.8, 136.7, 136.6, 132.5, 129.6, 129.5, 129.4, 129.1, 128.8, 128.7, 127.2, 118.5, 109.9, 70.4, 70.3, 61.3, 61.2, 55.4, 55.3, 54.2, 54.1, 51.1, 51.0, 37.4, 37.3, 14.4; IR (KBr)  $\nu$ : 3442, 3318, 3220, 3146, 2976, 2180, 1750, 1693, 1627, 1581, 1536, 1494, 1349, 1304, 1247, 1185, 1092, 1027, 976, 825  $\text{cm}^{-1}$ ; MS ( $m/z$ ): HRMS (ESI) Calcd. for  $\text{C}_{24}\text{H}_{23}\text{ClN}_4\text{O}_4\text{S}$  ( $[\text{M}+\text{H}]^+$ ): 521.1129, found: 521.1017.

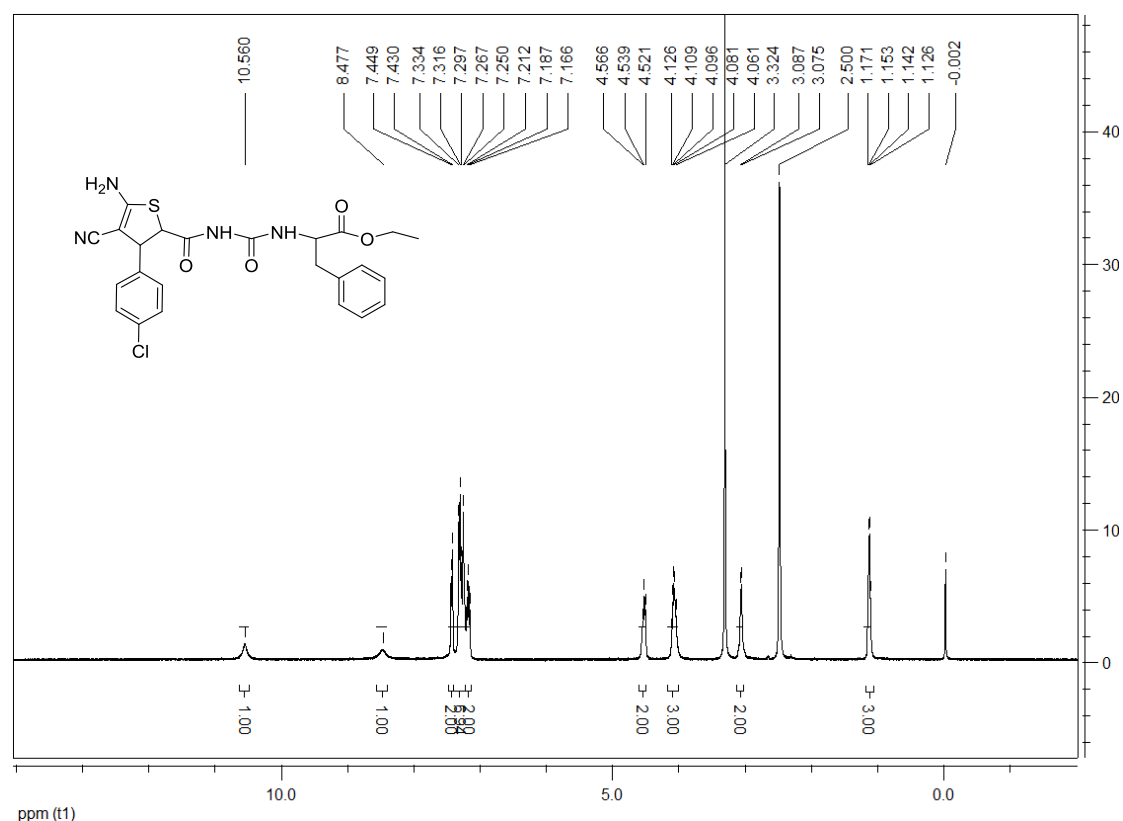

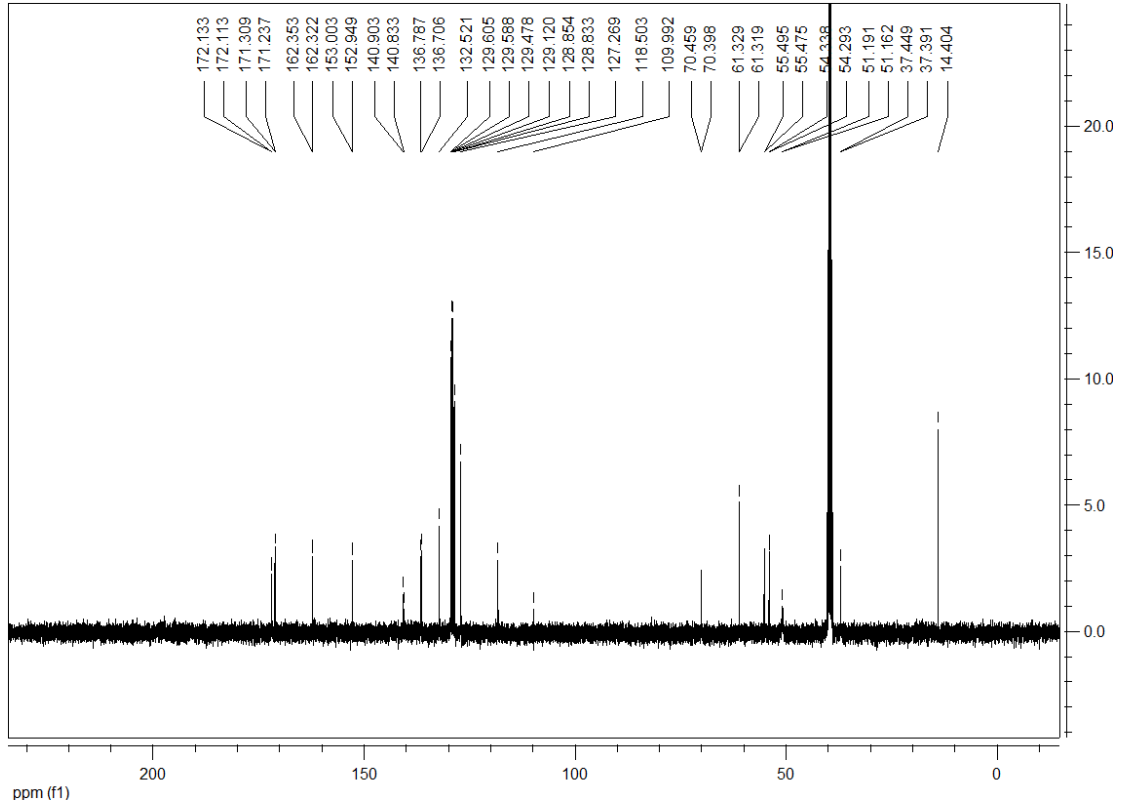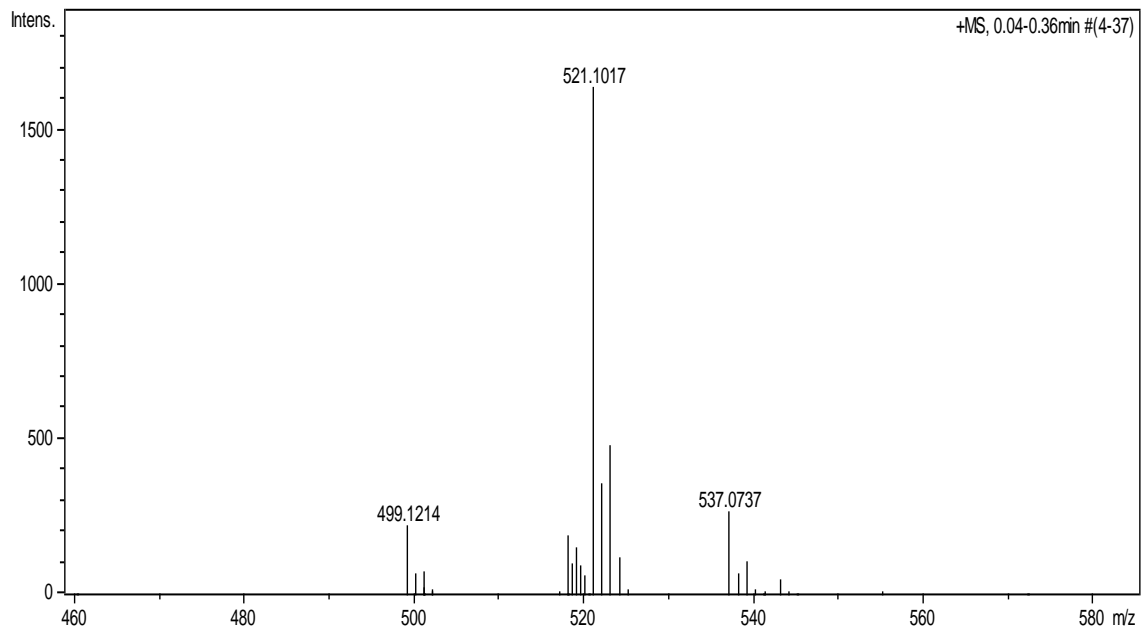

## Ethyl

**((5-amino-3-(4-bromophenyl)-4-cyano-2,3-dihydrothiophene-2-carbonyl)carbamoyl)phenylalaninate (2l)**: yellow solid, 55%, m.p. 174-176°C;  $^1\text{H}$  NMR (400 MHz,  $\text{DMSO-}d_6$ )  $\delta$ : 10.55 (s, 1H, NH), 8.47 (s, 1H, NH), 7.58-7.56 (m, 2H, ArH), 7.33-7.30 (m, 2H, ArH), 7.29-7.23 (m, 5H, ArH,  $\text{NH}_2$ ), 7.21-7.17 (m, 2H, ArH), 4.58-4.55 (m, 1H, CH), 4.52-4.50 (m, 1H, CH), 4.13-4.07 (m, 3H, CH), 3.11-3.06 (m, 2H, CH), 1.15 (t,  $J = 7.2$  Hz, 3H,  $\text{CH}_3$ ); *dr*-isomer: 1.14 (t,  $J = 7.2$  Hz, 3H,  $\text{CH}_3$ ). *dr*-ratio = 0.53:0.47.  $^{13}\text{C}$  NMR (100 MHz,  $\text{DMSO-}d_6$ )  $\delta$ : 172.1, 172.0, 171.3, 171.2, 162.3, 162.2, 153.0, 152.9, 136.7, 136.6, 132.0, 131.9, 132.0, 129.8, 129.7, 129.6, 128.8, 127.2, 121.0, 118.5, 70.3, 70.2, 61.3, 61.2, 61.3, 55.4, 55.3, 55.2, 54.3, 54.2, 54.1, 51.1, 37.4, 37.3, 14.4, 14.3; IR (KBr)  $\nu$ : 3444, 3318, 3219, 3145, 2972, 2180, 1749, 1694, 1626, 1580, 1536, 1493, 1349, 1246, 1185, 1019, 976, 823  $\text{cm}^{-1}$ ; MS ( $m/z$ ): HRMS (ESI) Calcd. for  $\text{C}_{24}\text{H}_{23}\text{BrN}_4\text{O}_4\text{SNa}$  ( $[\text{M}+\text{Na}]^+$ ): 565.0623, found: 565.0529.

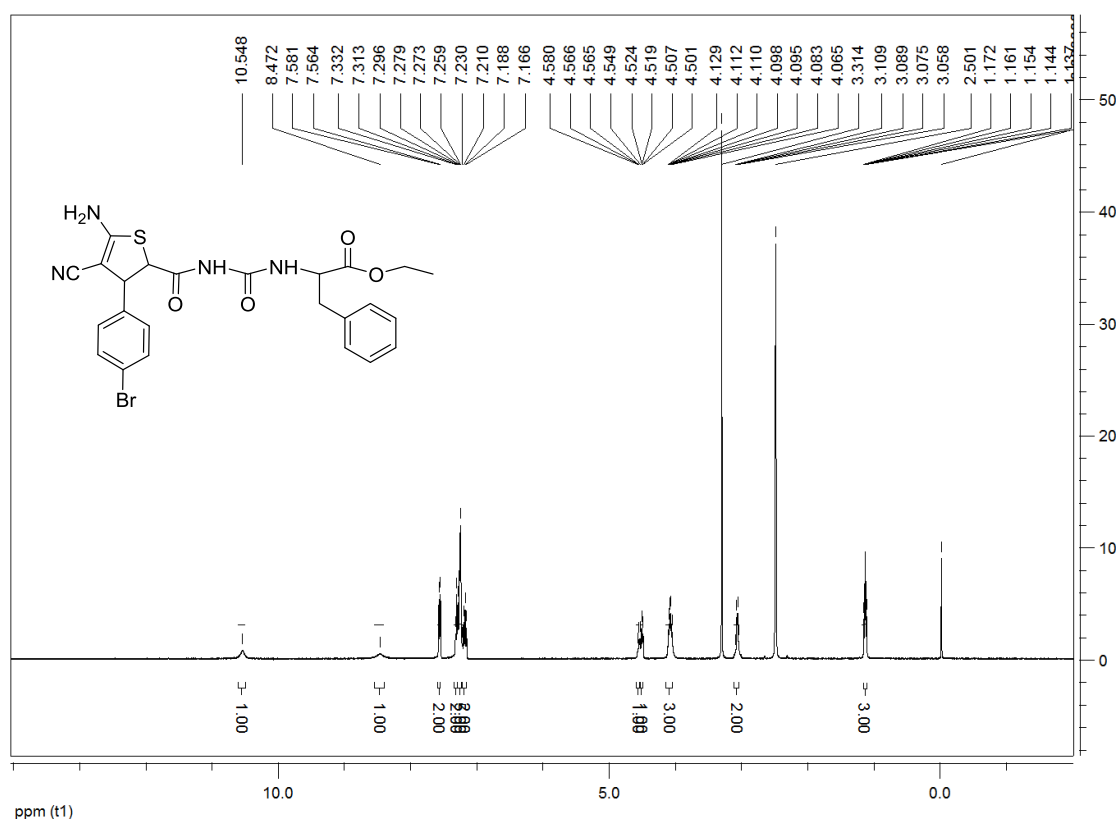

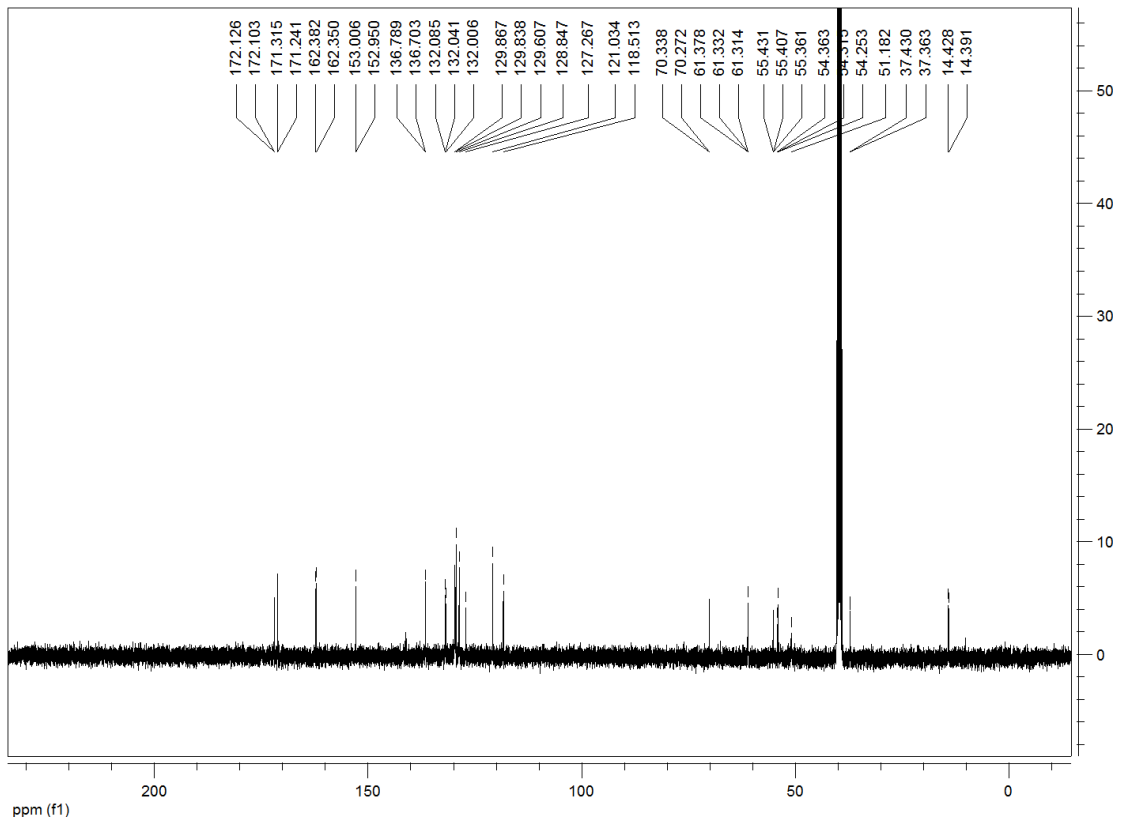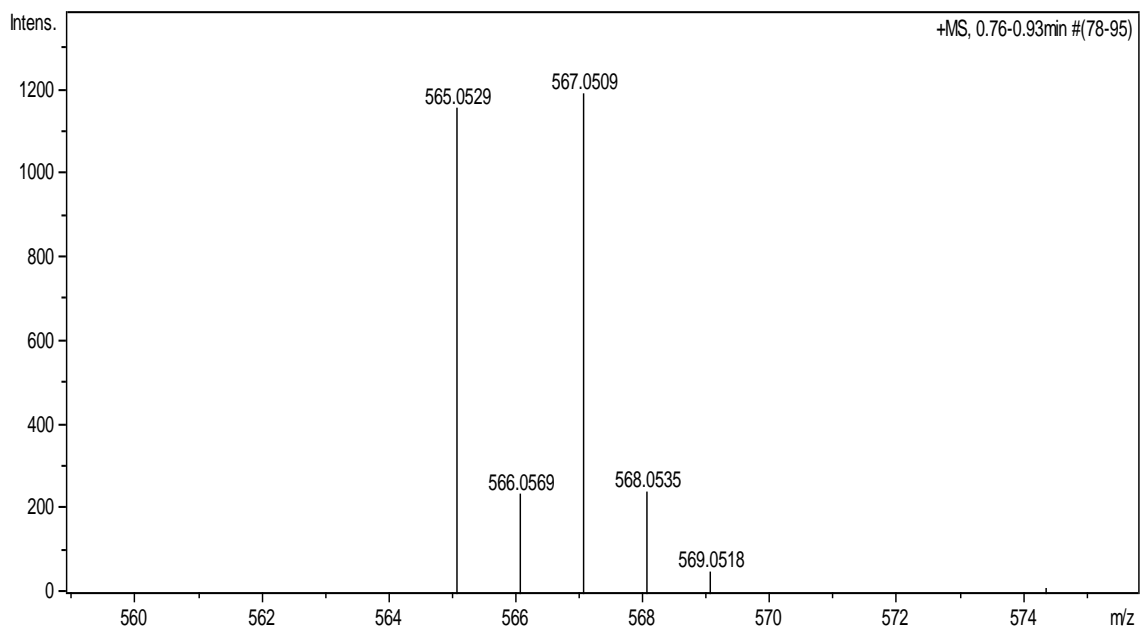

## Ethyl

**2-(3-(5-amino-4-cyano-3-(4-methoxyphenyl)-2,3-dihydrothiophene-2-carbonyl)ureido)-4-phenylbutanoate (2m)**: white solid, 67%, m.p. 218-220°C; <sup>1</sup>H NMR (400 MHz, DMSO-*d*<sub>6</sub>) δ: 10.59 (s, 1H, NH), 8.58 (s, 1H, NH), 7.31-7.27 (m, 2H, ArH), 7.24-7.15 (m, 7H, ArH, NH<sub>2</sub>), 6.93 (d, *J* = 8.8 Hz, 2H, ArH), 4.54-4.53 (m, 1H, CH), 4.30-4.28 (m, 1H, CH), 4.13-4.10 (m, 3H, CH), 3.75 (s, 3H, OCH<sub>3</sub>), 2.65-2.60 (m, 2H, CH), 2.10-2.03 (m, 2H, CH), 1.20 (t, *J* = 7.2 Hz, 3H, CH<sub>3</sub>); ; *dr*-isomer: 3.74 (s, 3H, OCH<sub>3</sub>), 1.19 (t, *J* = 7.2 Hz, 3H, CH<sub>3</sub>). *dr*-ratio = 0.54:0.46. <sup>13</sup>C NMR (100 MHz, DMSO-*d*<sub>6</sub>) δ: 172.4, 172.3, 171.8, 171.7, 161.7, 159.1, 153.1, 153.0, 140.9, 140.8, 133.7, 133.6, 128.8, 128.7, 128.6, 126.4, 118.6, 114.5, 71.2, 71.2, 61.3, 61.2, 55.9, 55.8, 55.5, 55.4, 52.4, 51.4, 51.3, 33.4, 31.5, 31.4, 14.4; IR (KBr) ν: 3423, 3313, 3224, 2925, 2855, 2182, 1698, 1632, 1581, 1543, 1505, 1348, 1306, 1249, 1181, 1029, 976, 830 cm<sup>-1</sup>; MS (*m/z*): HRMS (ESI) Calcd. for C<sub>26</sub>H<sub>28</sub>N<sub>4</sub>O<sub>5</sub>S ([M+Na]<sup>+</sup>): 531.1780, found: 531.1680.

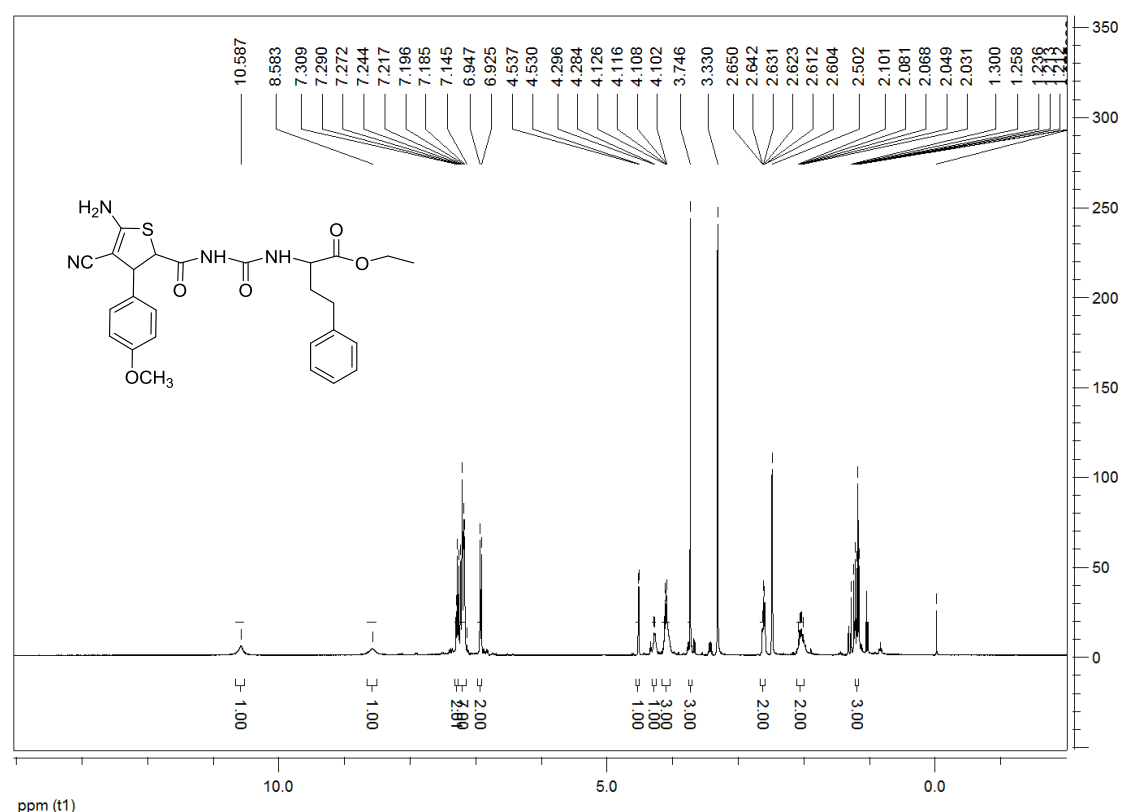

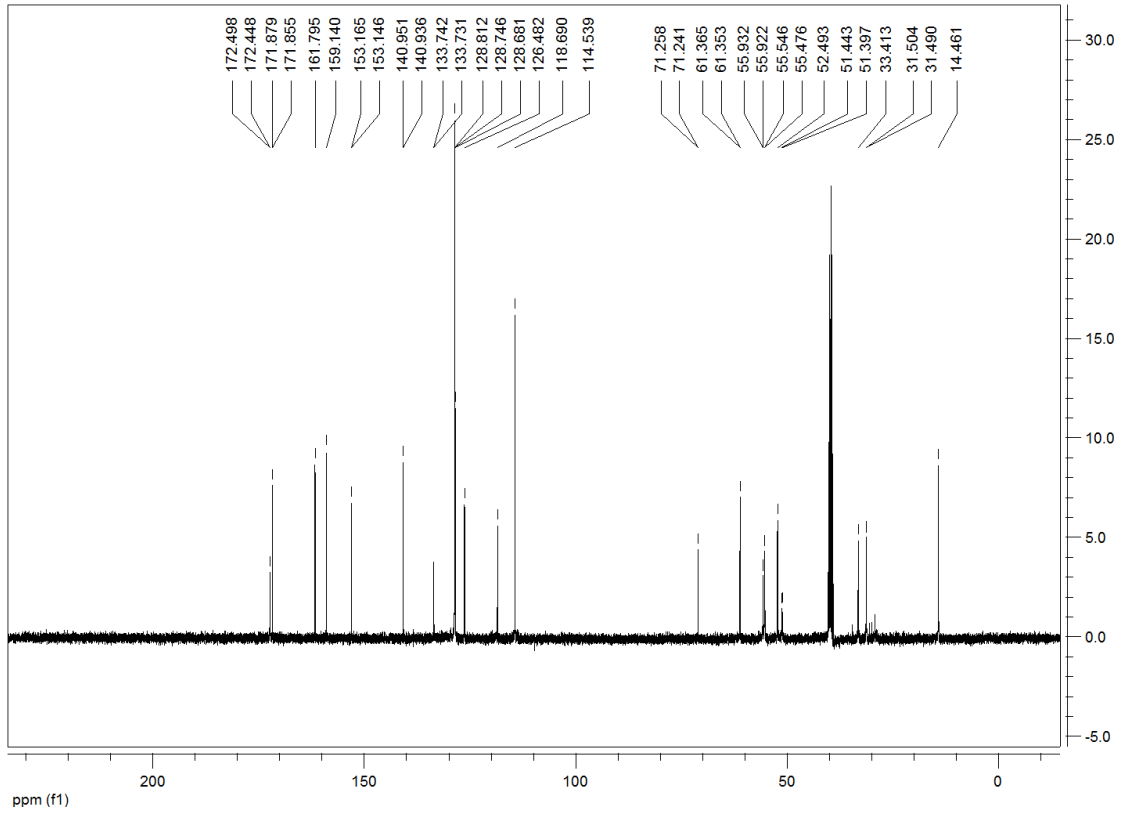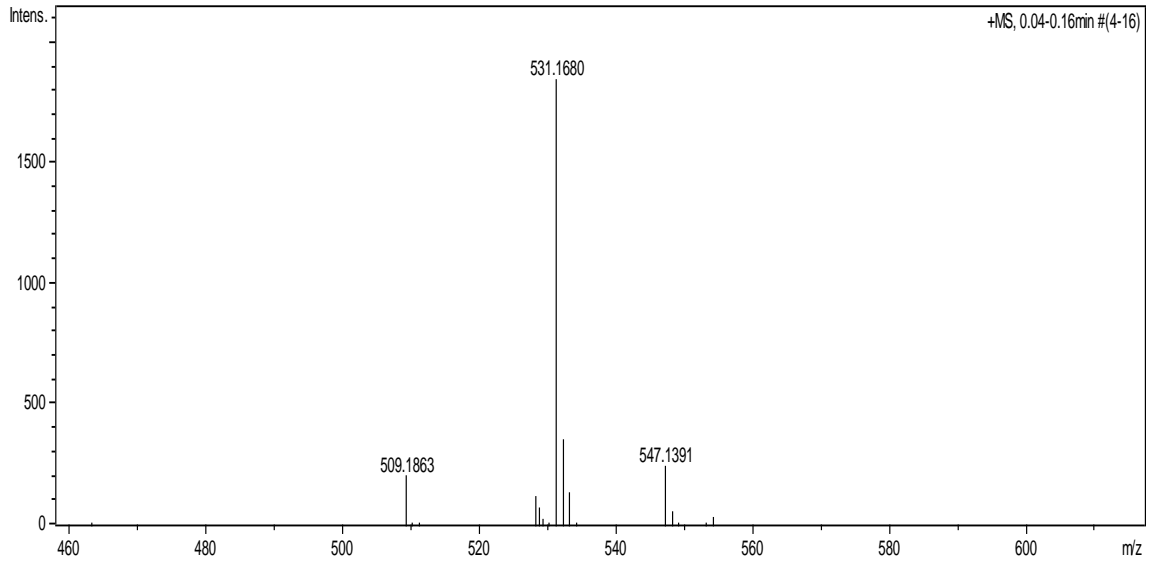

## Ethyl

**((5-amino-4-cyano-3-(4-methoxyphenyl)-2,3-dihydrothiophene-2-carbonyl)carbamoyl)tyrosinate (2n)**: white solid, 57%, m.p. 171-173 °C; <sup>1</sup>H NMR (400 MHz, DMSO-*d*<sub>6</sub>) δ: 10.55 (s, 1H, NH), 9.29 (d, *J* = 6.0 Hz, 1H, OH), 8.45 (s, 1H, NH), 7.27-7.17 (m, 2H, ArH, NH<sub>2</sub>), 6.98-6.92 (m, 4H, ArH), 6.70-6.68 (m, 2H, ArH), 4.49-4.45 (m, 2H, CH), 4.12-4.06 (m, 3H, CH), 3.75 (s, 3H, OCH<sub>3</sub>), 2.96 (m, 2H, CH), 1.17 (t, *J* = 6.8 Hz, 3H, CH<sub>3</sub>); *dr*-isomer δ: 3.74 (s, 3H, OCH<sub>3</sub>), 1.15 (t, *J* = 7.2 Hz, 3H, CH<sub>3</sub>). *dr*-ratio = 0.55:0.45. <sup>13</sup>C NMR (100 MHz, DMSO-*d*<sub>6</sub>) δ: 172.2, 172.1, 171.4, 171.3, 161.7, 161.6, 159.1, 156.6, 152.9, 133.7, 133.6, 133.5, 130.5, 128.6, 126.6, 126.5, 118.6, 115.6, 114.5, 71.1, 71.0, 61.2, 61.1, 55.8, 55.7, 55.5, 54.5, 51.5, 51.4, 51.3, 36.7, 36.6, 14.4; IR (KBr) ν: 3442, 3310, 3221, 3145, 2969, 2840, 2178, 1747, 1692, 1623, 1580, 1544, 1509, 1349, 1303, 1247, 1180, 1113, 1033, 976, 826 cm<sup>-1</sup>; MS (*m/z*): HRMS (ESI) Calcd. for C<sub>25</sub>H<sub>26</sub>N<sub>4</sub>O<sub>6</sub>S ([M+Na]<sup>+</sup>): 533.1573, found: 533.1474.

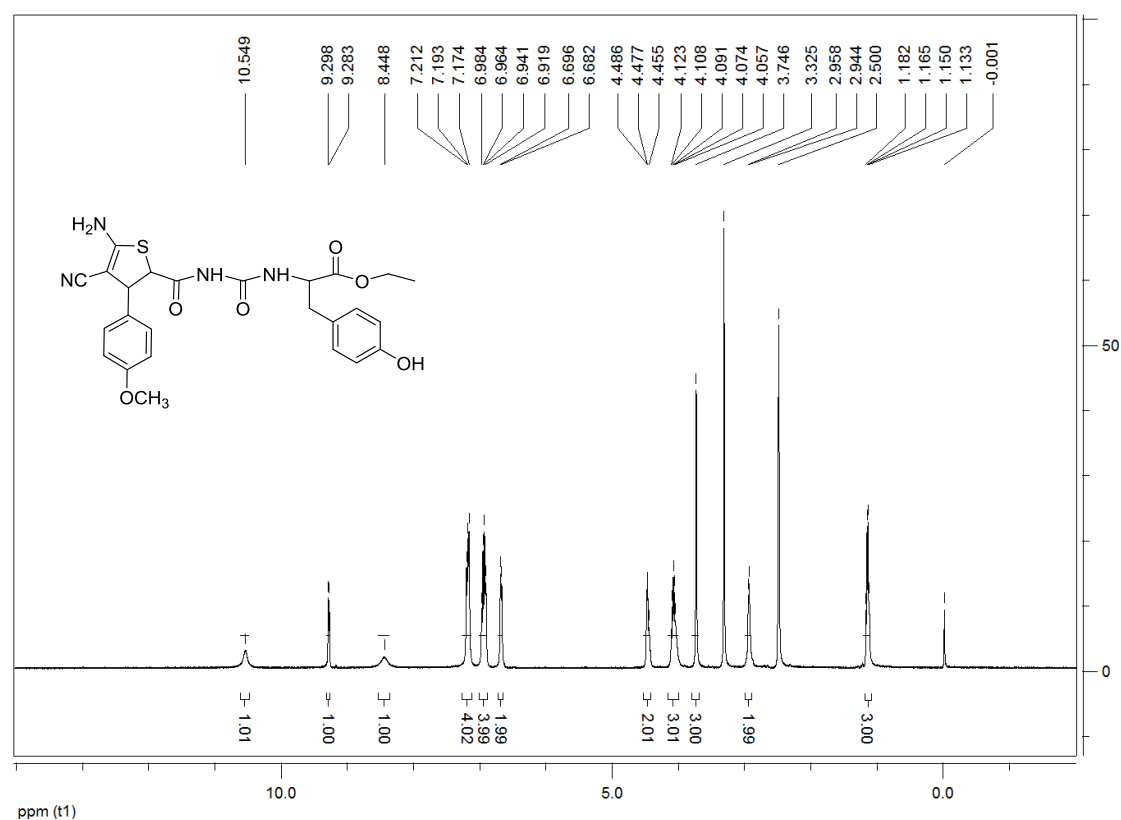

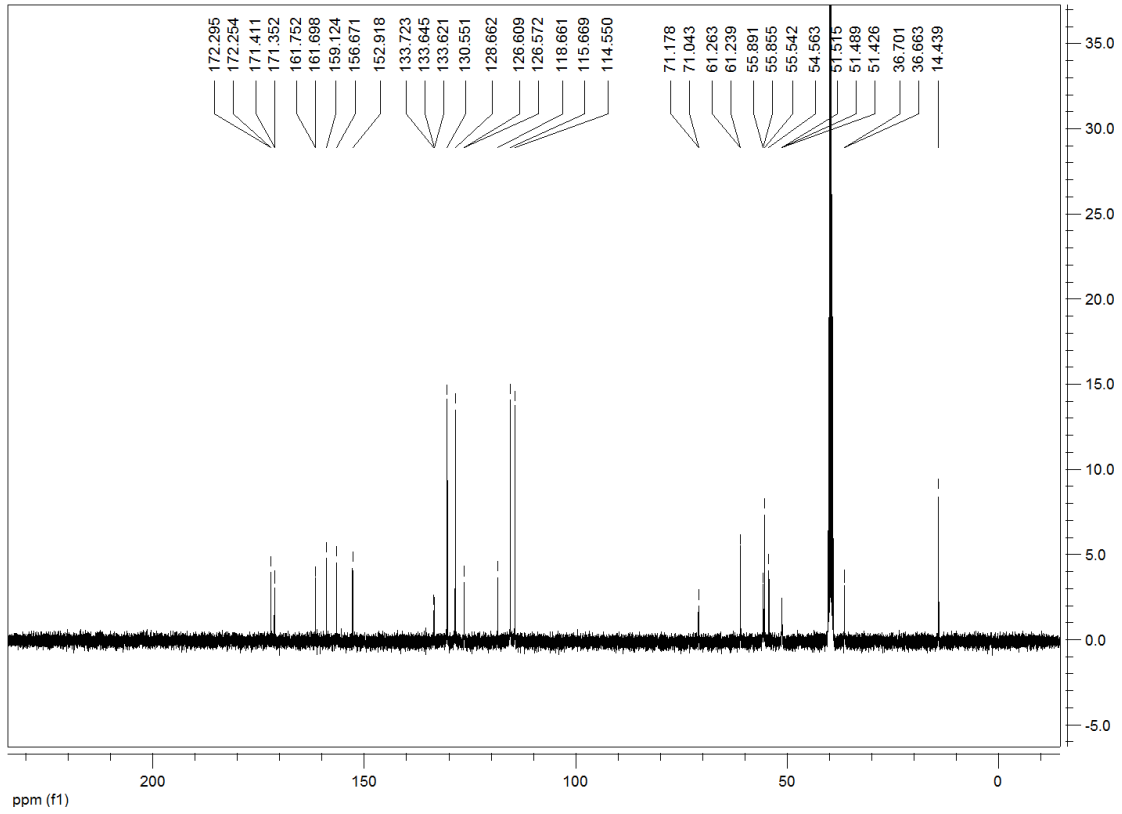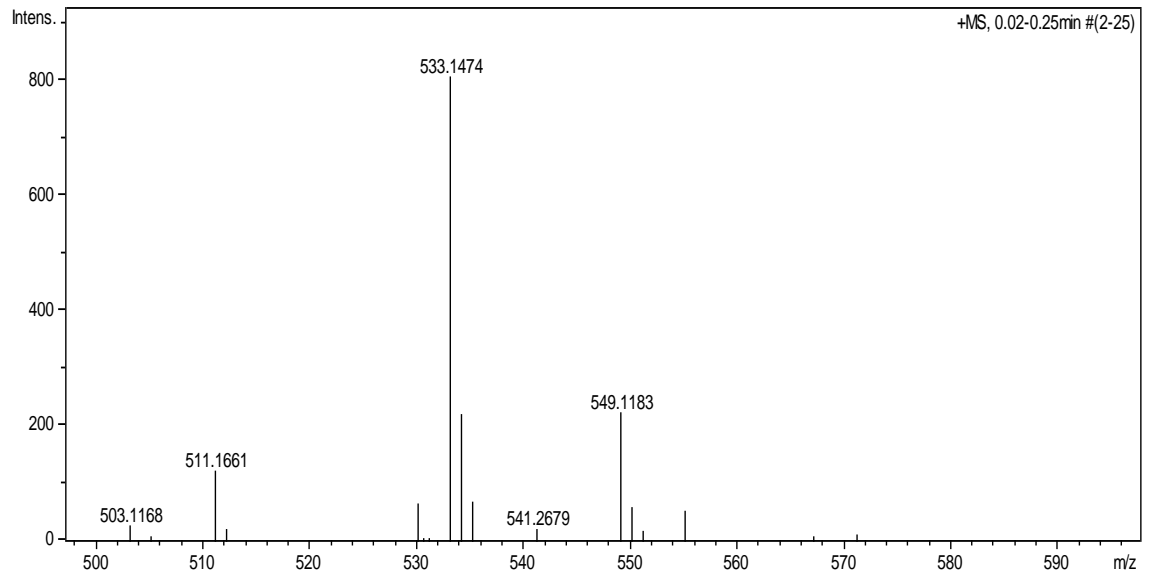



## Ethyl

### ((5-amino-4-cyano-3-(4-methoxyphenyl)thiophene-2-carbonyl)carbamoyl)phenylalaninate

(**3a**): yellow solid, 62%, m.p. 177-179°C; <sup>1</sup>H NMR (400 MHz, DMSO-*d*<sub>6</sub>) δ: 8.49 (d, *J* = 7.6 Hz, 1H, NH), 8.10 (d, *J* = 8.0 Hz, 3H, NH, NH<sub>2</sub>), 7.35 (d, *J* = 8.4 Hz, 2H, ArH), 7.31-7.21 (m, 3H, ArH), 7.13 (d, *J* = 8.8 Hz, 2H, ArH), 7.08 (d, *J* = 8.8 Hz, 2H, ArH), 4.51-4.46 (m, 1H, CH), 4.06 (q, *J* = 7.2 Hz, 2H, CH), 3.82 (s, 3H, OCH<sub>3</sub>), 3.07-2.97 (m, 2H, CH), 1.13 (t, *J* = 7.2 Hz, 3H, CH<sub>3</sub>); <sup>13</sup>C NMR (100 MHz, DMSO-*d*<sub>6</sub>) δ: 171.2, 167.6, 161.9, 160.6, 152.0, 146.0, 136.7, 130.8, 129.5, 128.7, 127.2, 124.4, 115.3, 114.9, 111.9, 89.5, 61.3, 55.7, 54.2, 37.4, 14.3; IR (KBr) ν: 3438, 3373, 3281, 3168, 2967, 2211, 1730, 1680, 1648, 1516, 1467, 1412, 1316, 1256, 1181, 1078, 1024, 876, 840 cm<sup>-1</sup>; MS (*m/z*): HRMS (ESI) Calcd. for C<sub>25</sub>H<sub>24</sub>N<sub>4</sub>O<sub>5</sub>S ([M+Na]<sup>+</sup>): 515.1467, found: 515.1357.

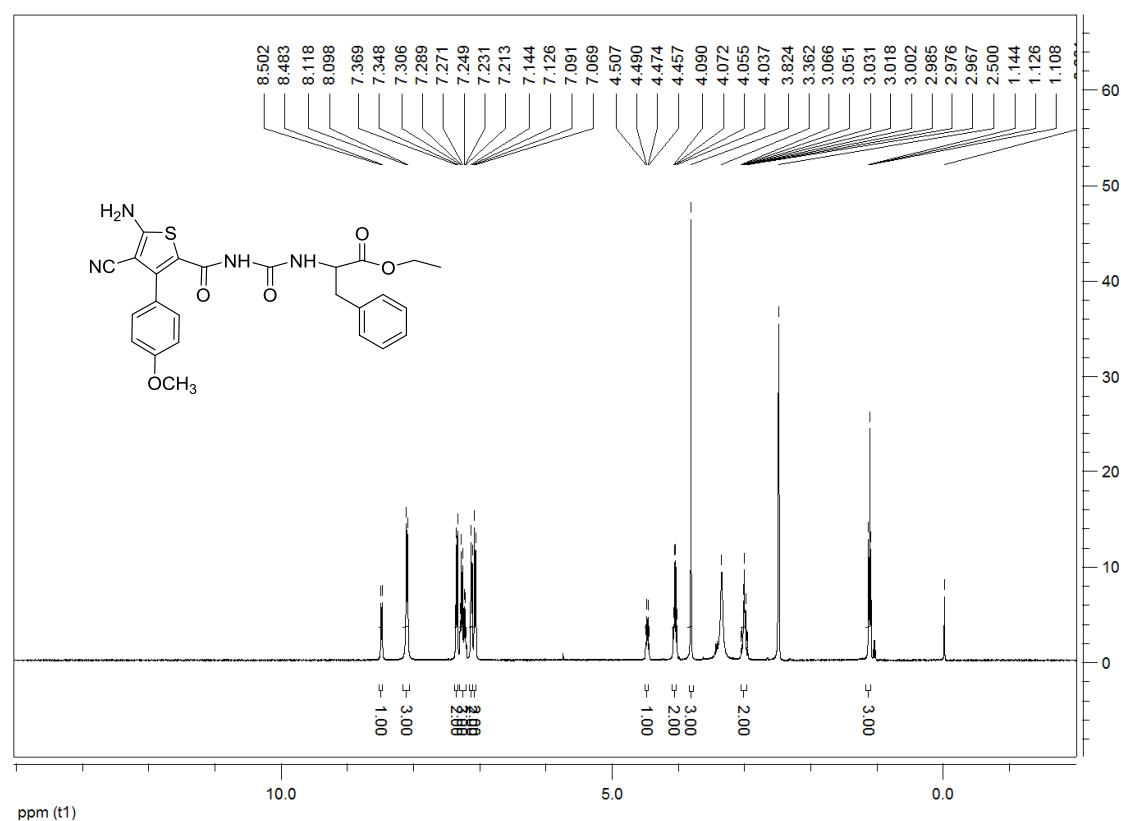

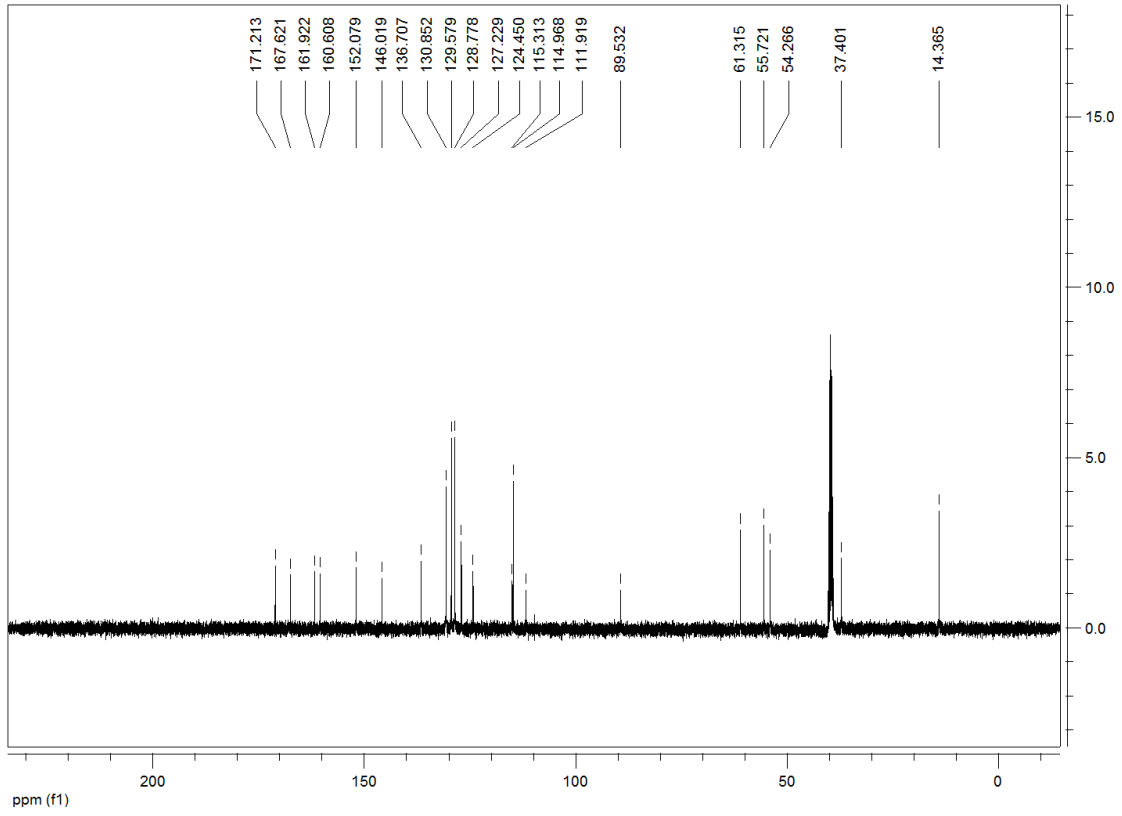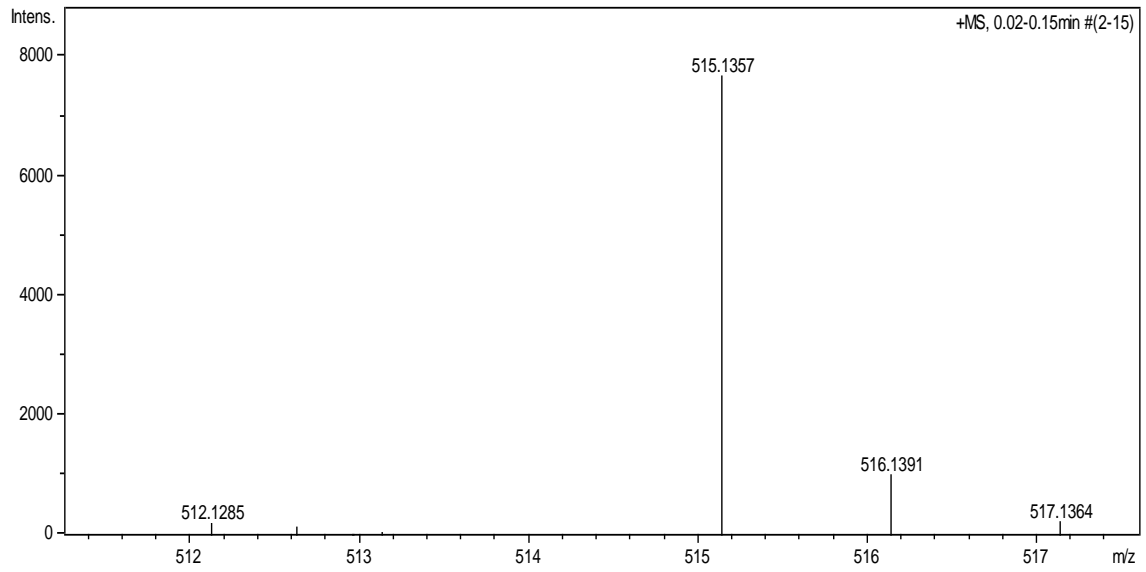

ethyl

**((5-amino-4-cyano-3-(3-methoxyphenyl)thiophene-2-carbonyl)carbamoyl)phenylalaninate**

**(3b)**: yellow solid, 60%, m.p. 174-176°C; <sup>1</sup>H NMR (400 MHz, DMSO-*d*<sub>6</sub>) δ: 8.48 (d, *J* = 7.2 Hz, 1H, NH), 8.15 (s, 3H, NH, NH<sub>2</sub>), 7.45 (t, *J* = 7.6 Hz, 1H, ArH), 7.30-7.21 (m, 3H, ArH), 7.14-7.09 (m, 3H, ArH), 7.01-6.97 (m, 2H, ArH), 4.48 (q, *J* = 6.8 Hz, 1H, CH), 4.06 (q, *J* = 6.8 Hz, 2H, CH), 3.79 (s, 3H, OCH<sub>3</sub>), 3.05-2.99 (m, 2H, CH), 1.13 (t, *J* = 6.8 Hz, 3H, CH<sub>3</sub>); <sup>13</sup>C NMR (100 MHz, DMSO-*d*<sub>6</sub>) δ: 171.1, 167.6, 161.7, 159.8, 152.0, 145.6, 136.6, 133.8, 130.8, 129.5, 128.7, 127.2, 121.3, 115.8, 115.1, 114.8, 112.2, 89.3, 61.3, 55.7, 55.7, 54.2, 54.2, 37.3, 14.3; IR (KBr) ν: 3371, 3308, 3202, 2931, 2210, 1693, 1640, 1470, 1317, 1255, 1201, 1082, 1029, 857 cm<sup>-1</sup>; MS (*m/z*): HRMS (ESI) Calcd. for C<sub>25</sub>H<sub>24</sub>N<sub>4</sub>O<sub>5</sub>S ([M+Na]<sup>+</sup>): 515.1467, found: 515.1357.

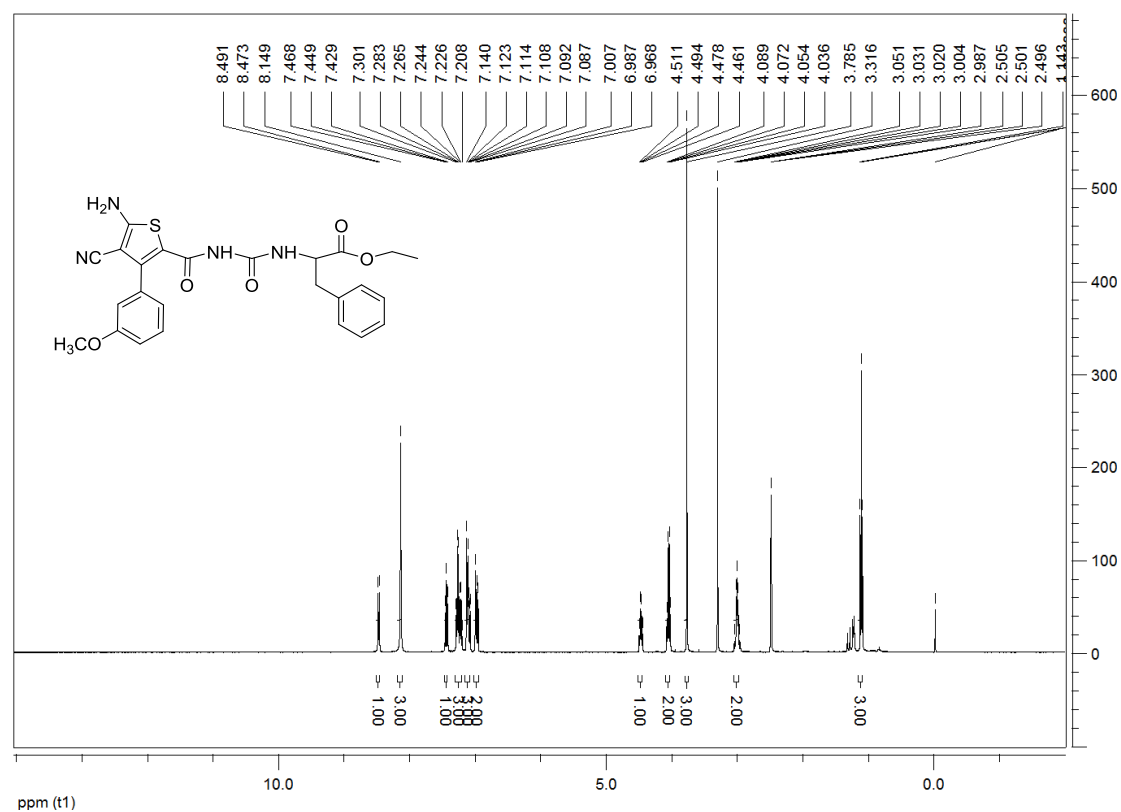

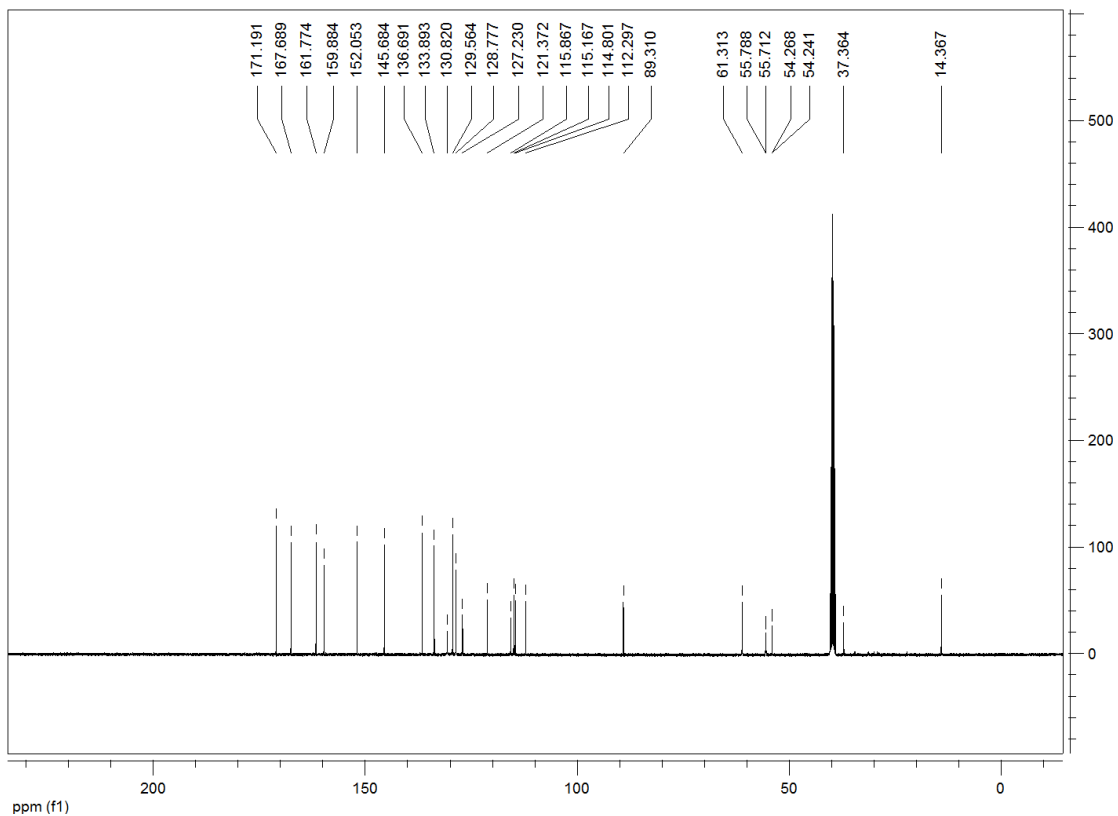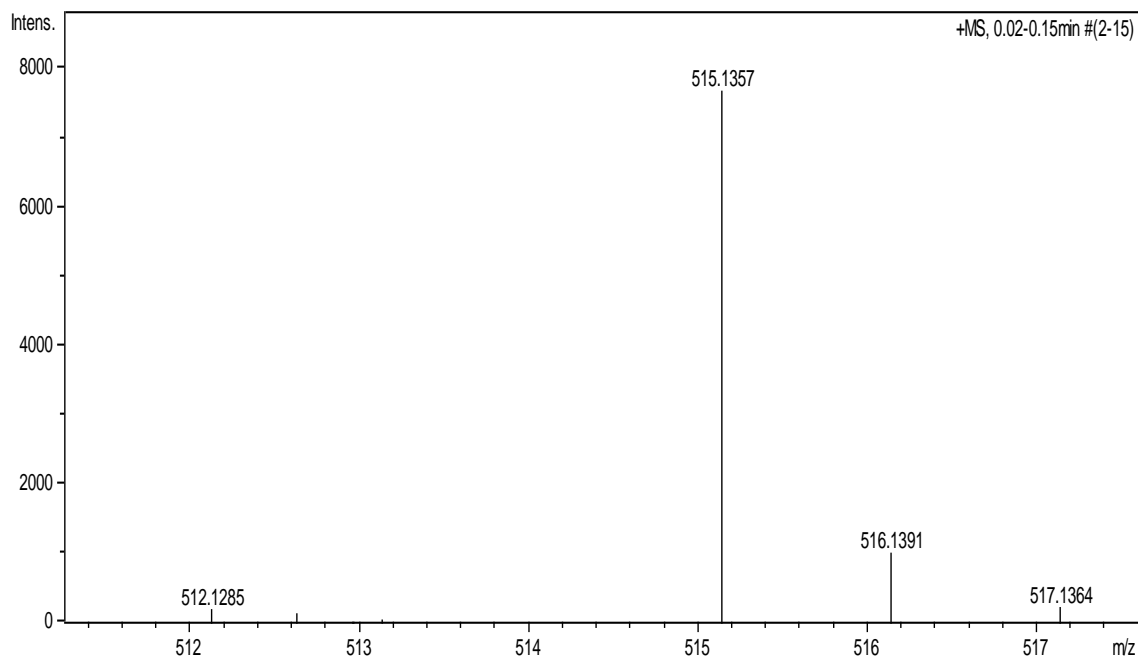

ethyl

**((5-amino-4-cyano-3-(2-methoxyphenyl)thiophene-2-carbonyl)carbamoyl)phenylalaninate**

(3c): yellow solid, 60%, m.p. 176-178°C; <sup>1</sup>H NMR (400 MHz, DMSO-*d*<sub>6</sub>) δ: 8.48 (d, *J* = 7.2 Hz, 1H, NH), 8.09 (s, 2H, NH<sub>2</sub>), 8.05 (s, 1H, NH), 7.53-7.49 (m, 1H, ArH), 7.31-7.26 (m, 3H, ArH), 7.24-7.19 (m, 2H, ArH), 7.14-7.08 (m, 3H, ArH), 4.50-4.45 (m, 1H, CH), 4.08-4.03 (m, 2H, CH), 3.72 (s, 3H, OCH<sub>3</sub>), 3.06-2.96 (m, 2H, CH), 1.12 (t, *J* = 7.2 Hz, 3H, CH<sub>3</sub>); <sup>13</sup>C NMR (100 MHz, DMSO-*d*<sub>6</sub>) δ: 171.2, 167.3, 161.7, 156.5, 152.0, 142.3, 136.7, 132.0, 130.9, 129.5, 128.7, 127.2, 121.4, 120.8, 115.1, 112.8, 112.7, 89.6, 61.2, 56.0, 54.2, 37.3, 14.3; IR (KBr) ν: 3371, 3184, 2926, 2849, 2214, 1742, 1693, 1649, 1514, 1468, 1319, 1251, 1182, 1079, 1020, 871 cm<sup>-1</sup>; MS (*m/z*): HRMS (ESI) Calcd. for C<sub>25</sub>H<sub>24</sub>N<sub>4</sub>NaO<sub>5</sub>S ([M+Na]<sup>+</sup>): 515.1365, found: 515.1375.

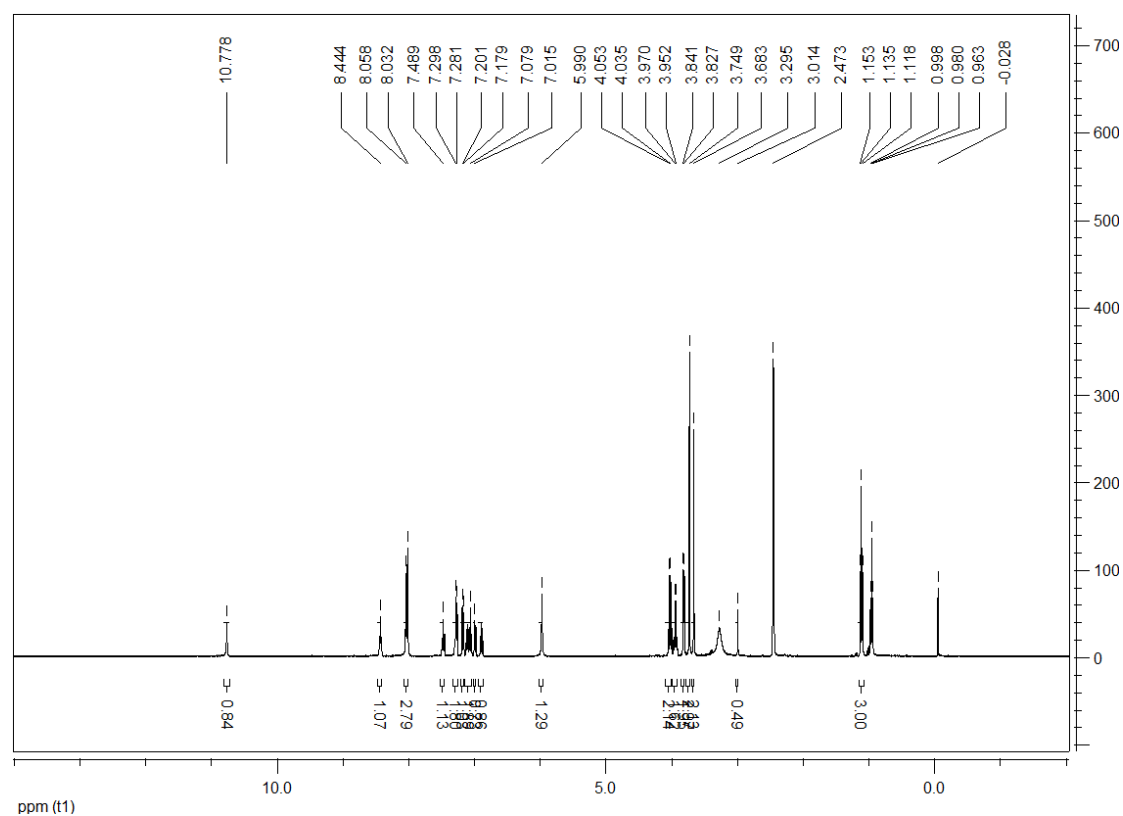

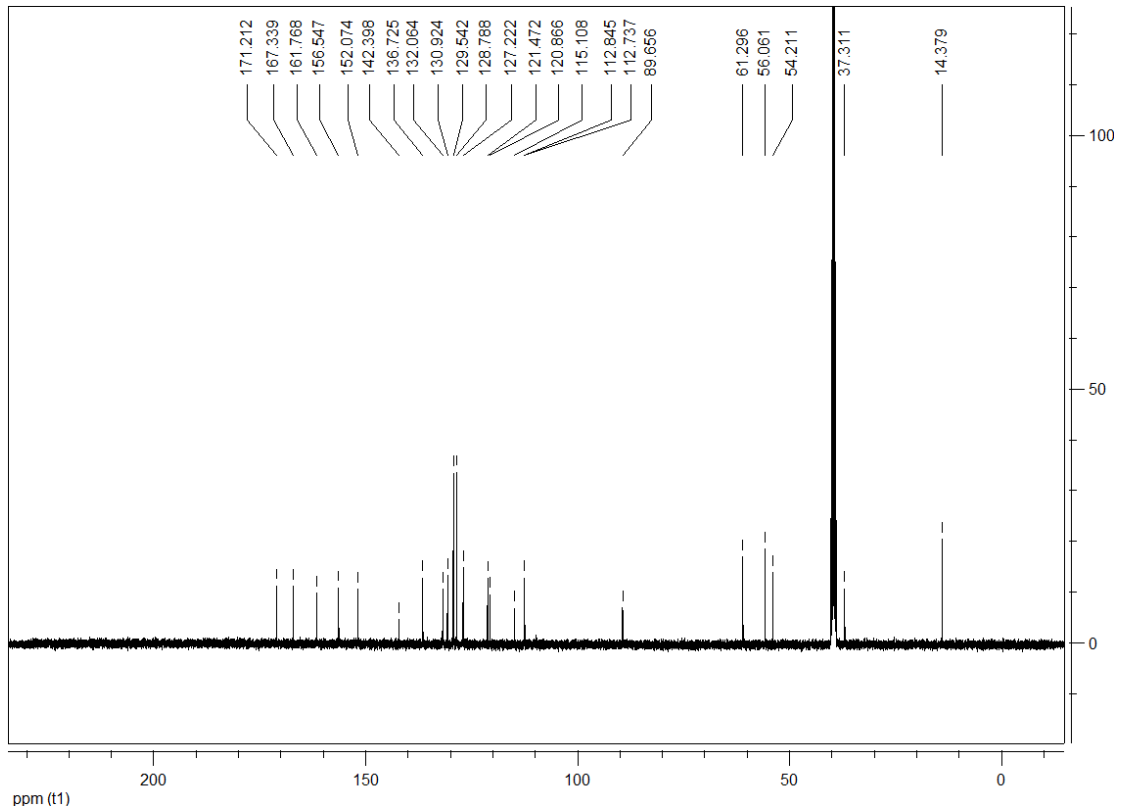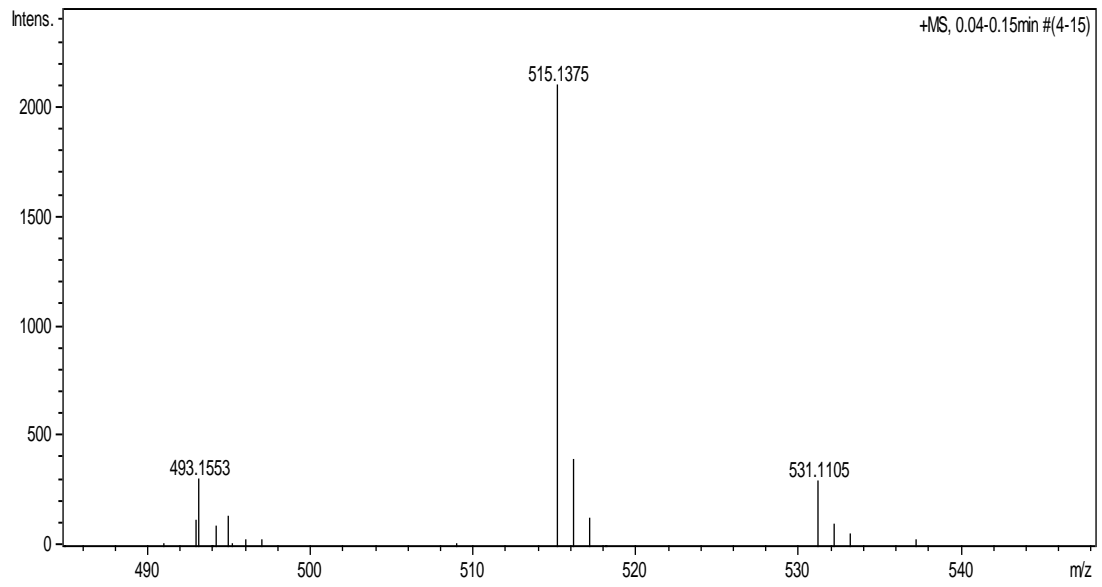

**ethyl ((5-amino-4-cyano-3-(p-tolyl)thiophene-2-carbonyl)carbamoyl)phenylalaninate (3d):**  
yellow solid, 55%, m.p. 176-178°C; <sup>1</sup>H NMR (400 MHz, DMSO-*d*<sub>6</sub>) δ: 8.49 (d, *J* = 7.2 Hz, 1H, NH), 8.14 (d, *J* = 7.6 Hz, 3H, NH NH<sub>2</sub>), 7.35-7.21 (m, 7H, ArH), 7.13 (d, *J* = 7.2 Hz, 2H, ArH), 4.48 (q, *J* = 6.8 Hz, 1H, CH), 4.06 (q, *J* = 6.8 Hz, 2H, CH), 3.05- (s, 3H, OCH<sub>3</sub>), 3.05-2.98 (m, 2H, CH), 2.38 (s, 3H, CH<sub>3</sub>), 1.13 (t, *J* = 6.8 Hz, 3H, CH<sub>3</sub>); <sup>13</sup>C NMR (100 MHz, DMSO-*d*<sub>6</sub>) δ: 171.2, 167.6, 161.8, 152.0, 146.1, 139.7, 136.6, 130.1, 129.6, 129.5, 129.2, 128.7, 127.2, 115.2, 112.0, 89.4, 61.3, 54.2, 37.3, 21.3, 14.3; IR (KBr) ν: 3447, 3378, 3273, 3170, 2991, 2211, 1731, 1681, 1651, 1516, 1467, 1407, 1348, 1317, 1263, 1210, 1180, 1077, 1018, 881, 825cm<sup>-1</sup>; MS (*m/z*): HRMS (ESI) Calcd. for C<sub>25</sub>H<sub>24</sub>N<sub>4</sub>O<sub>4</sub>S ([M+Na]<sup>+</sup>): 499.1518, found: 499.1412.

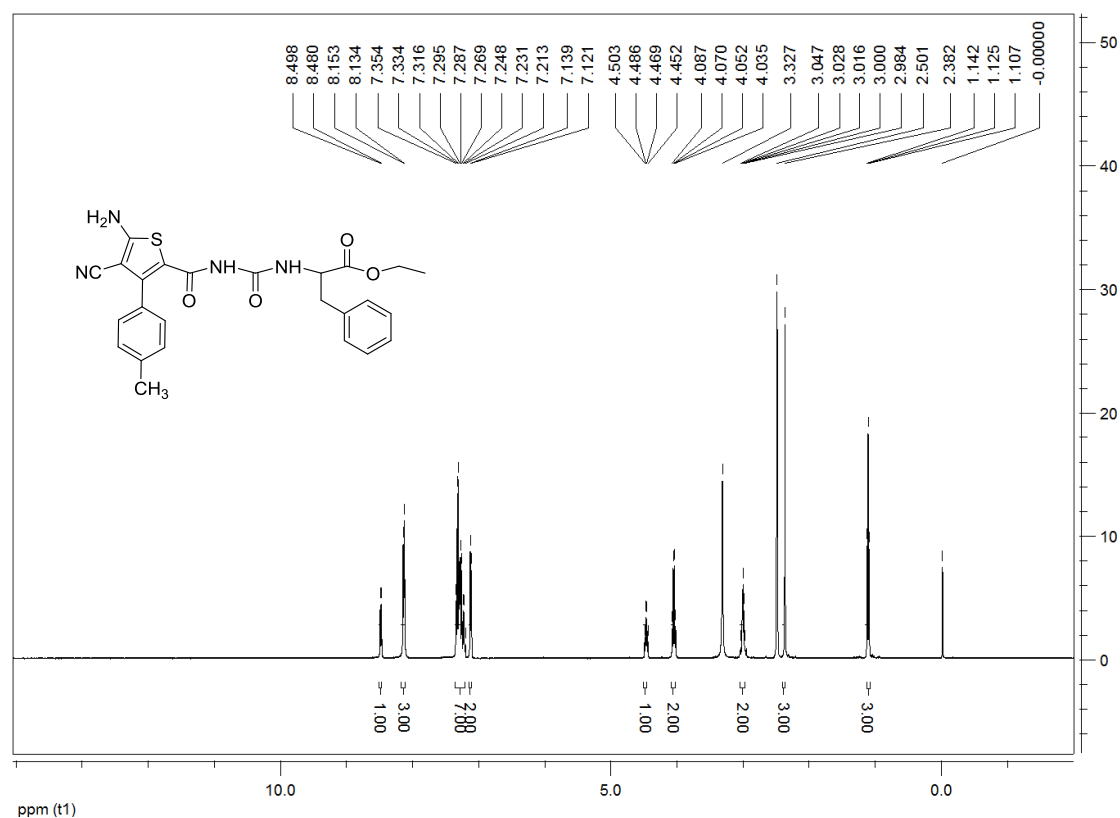

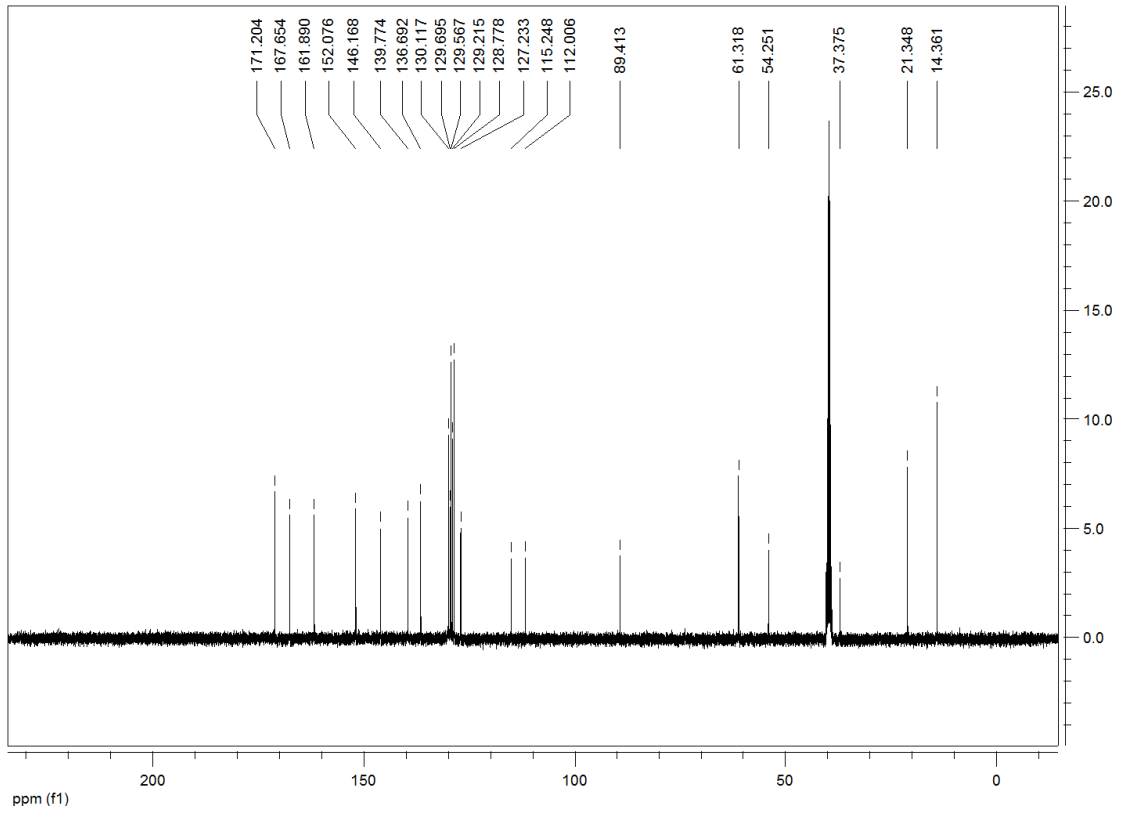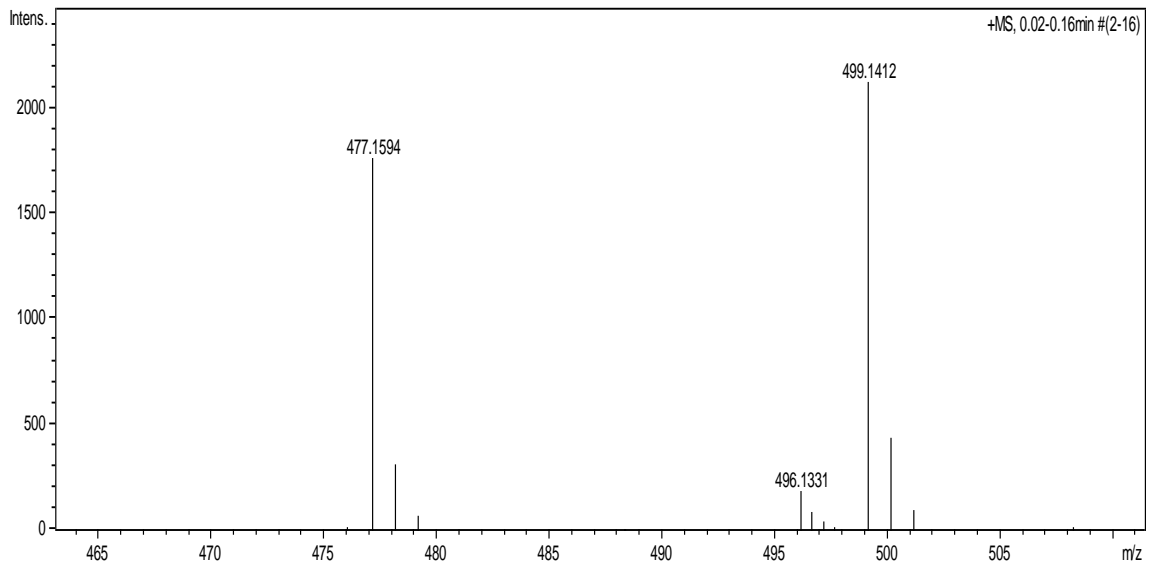



**ethyl**

**((5-amino-3-(4-chlorophenyl)-4-cyanothiophene-2-carbonyl)carbamoyl)phenylalaninate (3e):**

yellow solid, 63%, m.p. 178-180°C; <sup>1</sup>H NMR (400 MHz, DMSO-*d*<sub>6</sub>) δ: 8.89 (s, 1H, NH), 8.47 (d, *J* = 6.4 Hz, 1H, NH), 8.13 (s, 2H, NH<sub>2</sub>), 7.56 (d, *J* = 7.6 Hz, 2H, ArH), 7.40 (d, *J* = 8.0 Hz, 2H, ArH), 7.28-7.23 (m, 3H, ArH), 7.13 (d, *J* = 6.0 Hz, 2H, ArH), 4.51-4.48 (m, 1H, CH), 4.08-4.04 (m, 2H, CH), 3.02-3.01 (m, 2H, CH), 1.13 (t, *J* = 6.8 Hz, 3H, CH<sub>3</sub>); <sup>13</sup>C NMR (100 MHz, DMSO-*d*<sub>6</sub>) δ: 171.2, 167.3, 162.1, 152.4, 144.7, 136.7, 134.5, 131.8, 131.3, 129.5, 129.1, 128.7, 127.2, 115.2, 112.1, 88.7, 61.3, 54.2, 37.3, 14.3; IR (KBr) ν: 3383, 3300, 2980, 2212, 1743, 1690, 1645, 1473, 1408, 1314, 1261, 1186, 1084, 1021, 845cm<sup>-1</sup>; MS (*m/z*): HRMS (ESI) Calcd. for C<sub>24</sub>H<sub>21</sub>ClN<sub>4</sub>NaO<sub>4</sub>S ([M+Na]<sup>+</sup>): 519.0870, found: 519.0878.

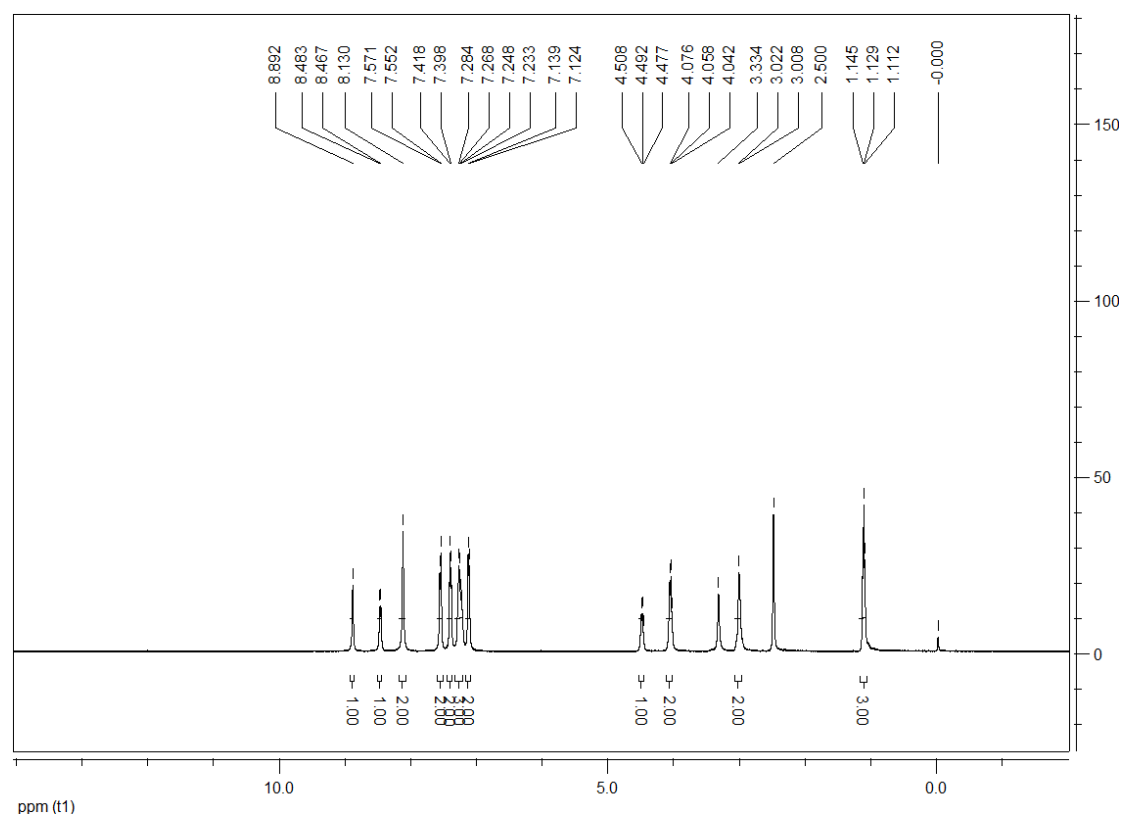

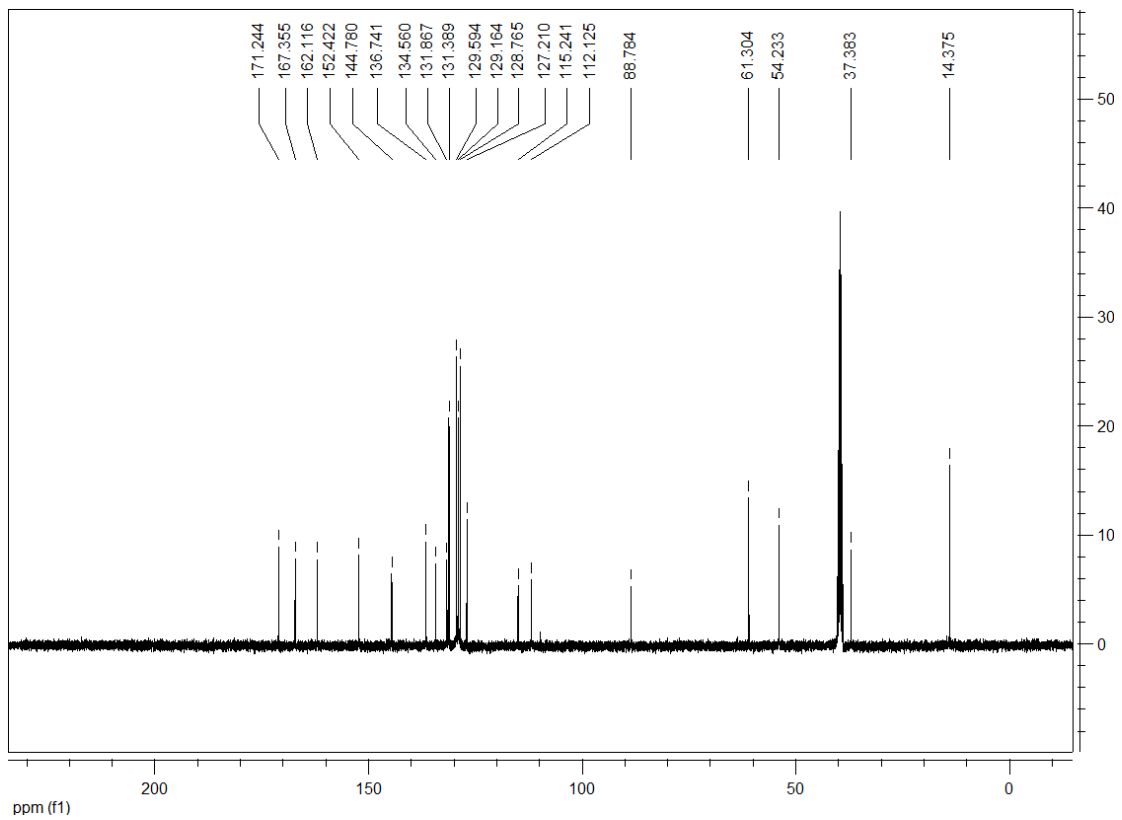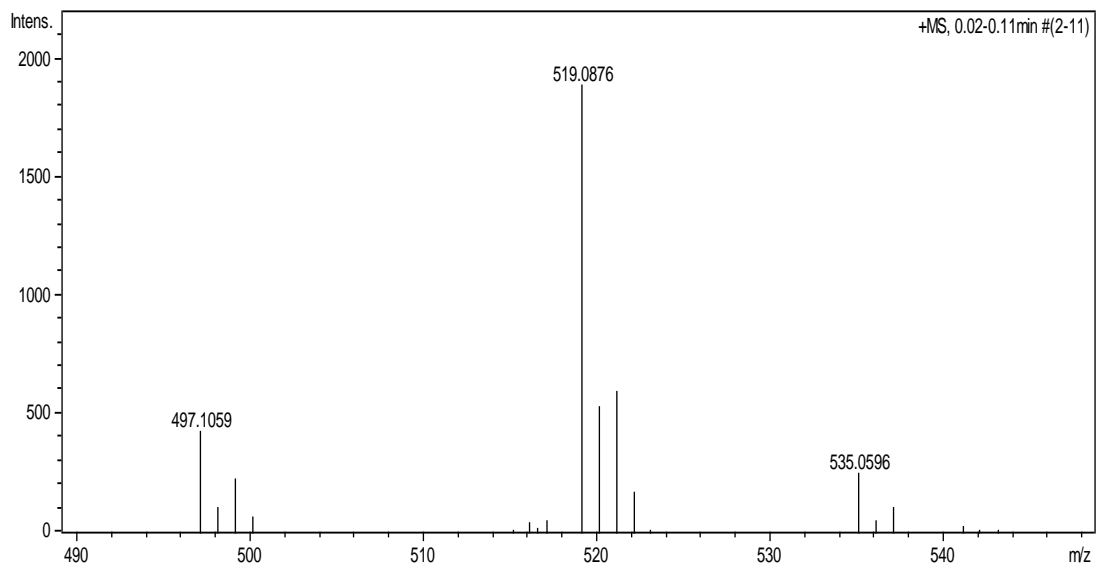

## ethyl

### ((5-amino-3-(4-bromophenyl)-4-cyanothiophene-2-carbonyl)carbamoyl)phenylalaninate (**3f**):

yellow solid, 55%, m.p. 156-158°C; <sup>1</sup>H NMR (400 MHz, DMSO-*d*<sub>6</sub>) δ: 8.93 (s, 1H, NH), 8.47 (d, *J* = 7.2 Hz, 1H, NH), 8.12 (s, 2H, NH<sub>2</sub>), 7.69 (d, *J* = 7.6 Hz, 2H, ArH), 7.33 (d, *J* = 8.0 Hz, 2H, ArH), 7.30-7.23 (m, 3H, ArH), 7.13 (d, *J* = 6.8 Hz, 2H, ArH), 4.50 (d, *J* = 6.8 Hz, 1H, CH), 4.07 (q, *J* = 7.2 Hz, 2H, CH), 3.04-3.01 (m, 2H, CH), 1.13 (t, *J* = 6.8 Hz, 3H, CH<sub>3</sub>); <sup>13</sup>C NMR (100 MHz, DMSO-*d*<sub>6</sub>) δ: 170.7, 166.9, 161.6, 151.9, 144.3, 136.2, 131.8, 131.6, 131.1, 129.1, 128.3, 126.7, 122.7, 114.7, 111.6, 88.2, 60.8, 53.7, 36.9, 13.9; IR (KBr) ν: 3383, 3300, 3199, 2922, 2213, 1691, 1646, 1474, 1411, 1317, 1262, 1186, 1077, 1017, 839 cm<sup>-1</sup>; MS (*m/z*): HRMS (ESI) Calcd. for C<sub>24</sub>H<sub>21</sub>BrN<sub>4</sub>O<sub>4</sub>S ([M+H]<sup>+</sup>): 541.0467, found: 541.0542.

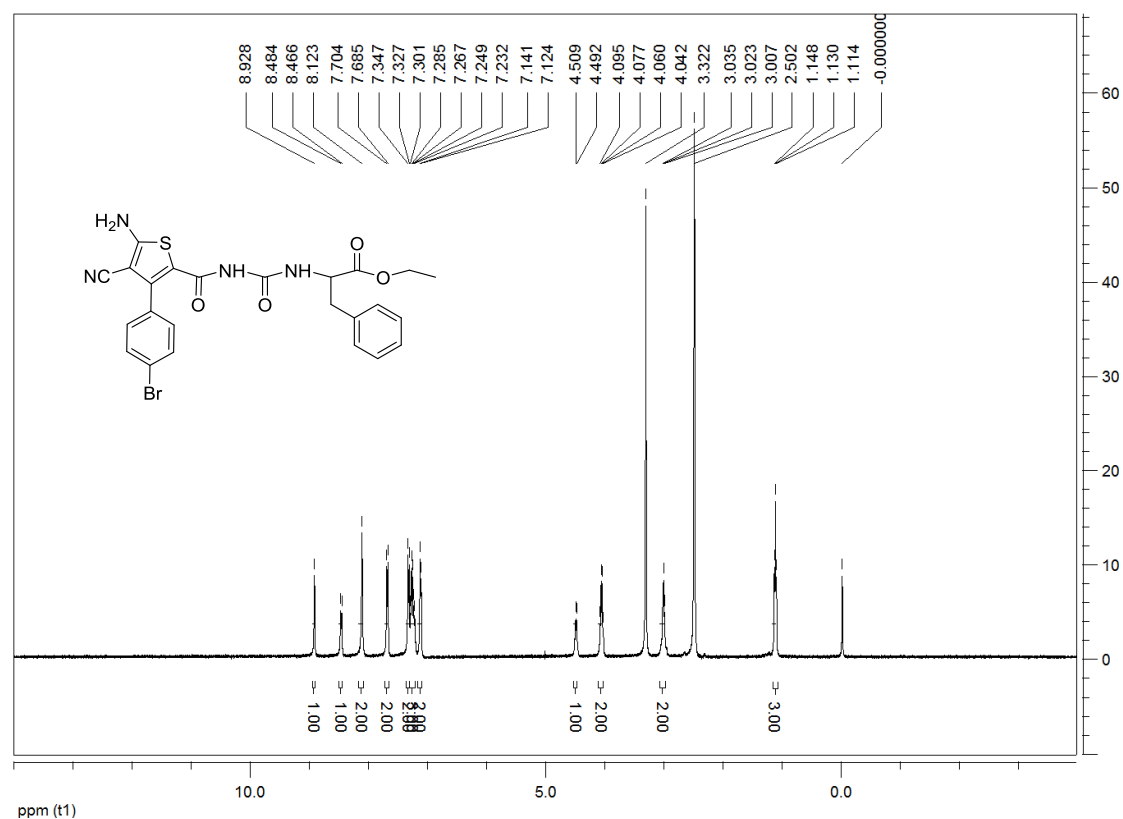

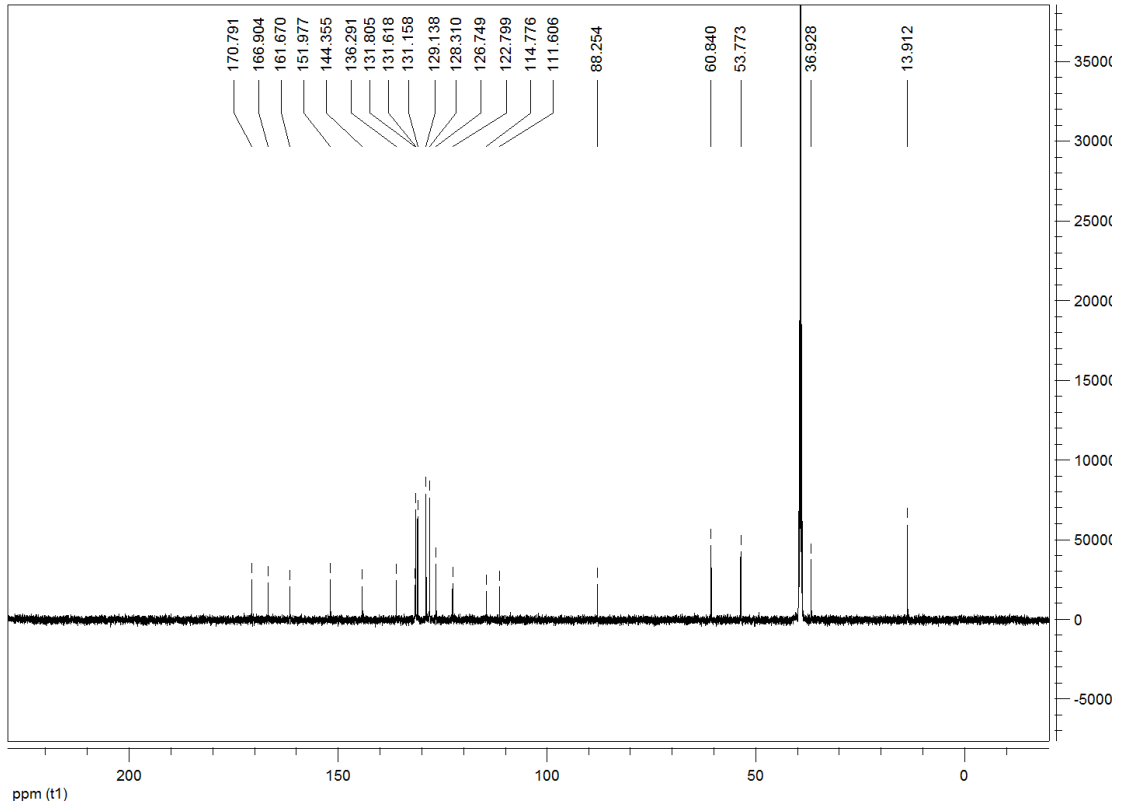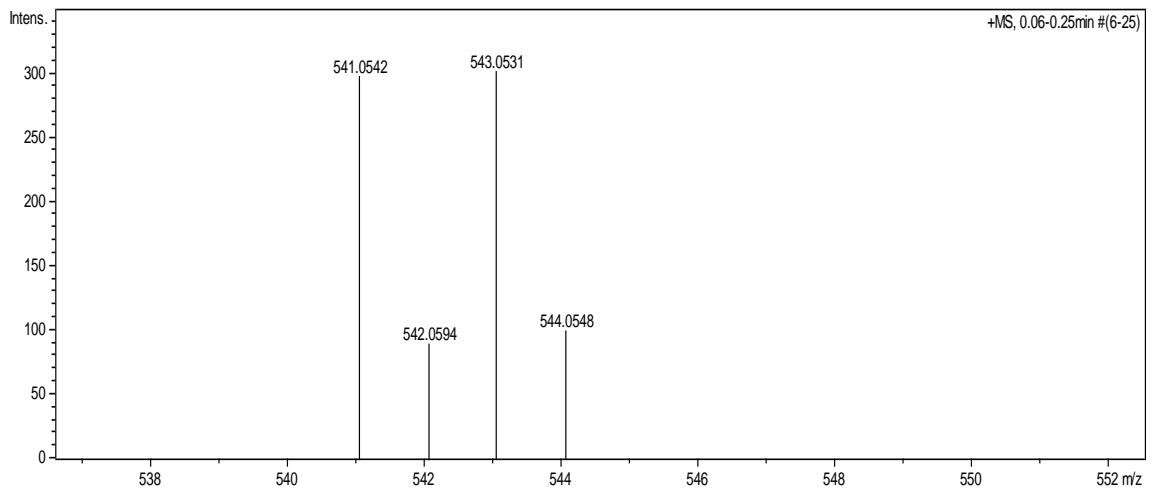

**ethyl ((5-amino-4-cyano-3-(p-tolyl)thiophene-2-carbonyl)carbamoyl)glycinate (3g):** yellow solid, 60%, m.p. 234-236°C; <sup>1</sup>H NMR (400 MHz, DMSO-*d*<sub>6</sub>) δ: 8.47 (t, *J* = 5.6 Hz, 1H, NH), 8.22 (s, 1H, NH), 8.10 (s, 2H, NH<sub>2</sub>), 7.35-7.31 (m, 4H, ArH), 4.09-4.04 (q, *J* = 7.2 Hz, 2H, CH), 3.85 (d, *J* = 5.6 Hz, 2H, CH), 2.37 (s, 3H, CH<sub>3</sub>), 1.16 (t, *J* = 7.2 Hz, 3H, CH<sub>3</sub>); <sup>13</sup>C NMR (100 MHz, DMSO-*d*<sub>6</sub>) δ: 170.0, 167.5, 161.6, 152.7, 146.1, 139.6, 130.0, 129.8, 129.2, 115.2, 112.1, 89.3, 60.9, 41.7, 21.3, 14.4; IR (KBr) ν: 3376, 3331, 3225, 2920, 2853, 2210, 1708, 1640, 1519, 1478, 1404, 1319, 1266, 1202, 1078, 1025, 864, 824 cm<sup>-1</sup>; MS (*m/z*): HRMS (ESI) Calcd. for C<sub>18</sub>H<sub>18</sub>N<sub>4</sub>O<sub>4</sub>S ([M+Na]<sup>+</sup>): 409.1049, found: 409.0939.

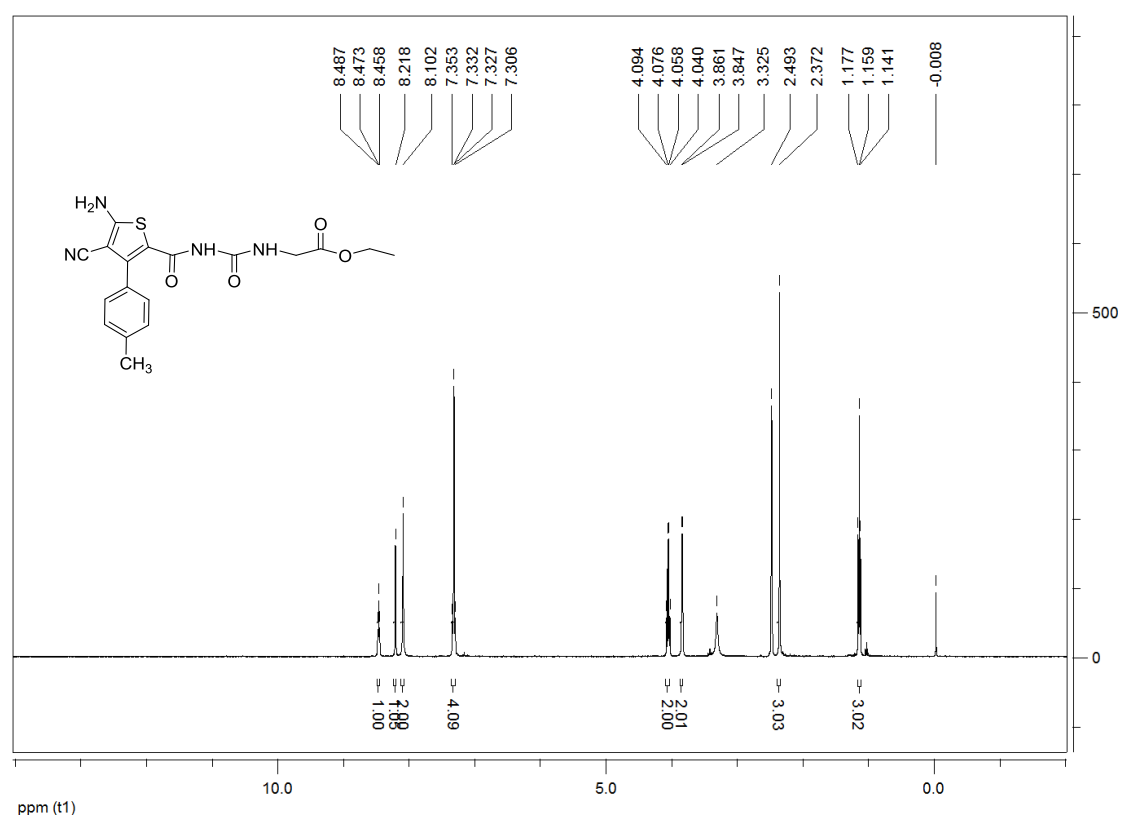

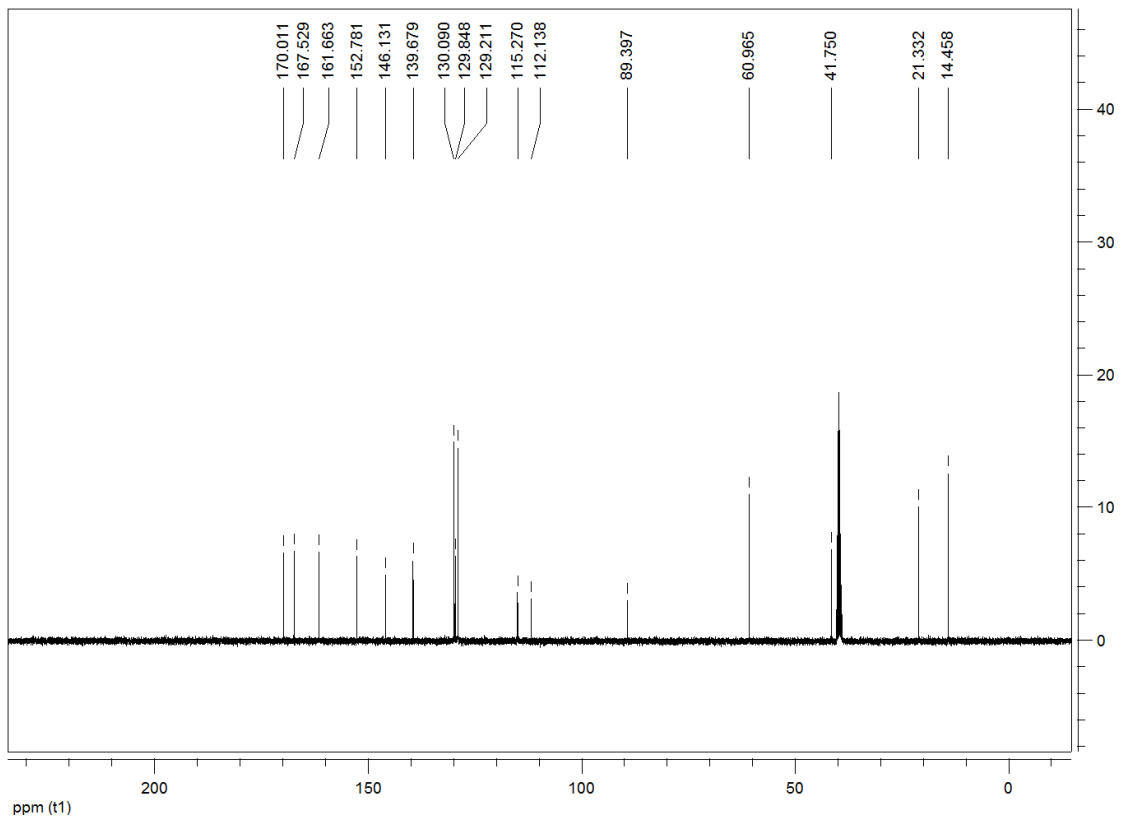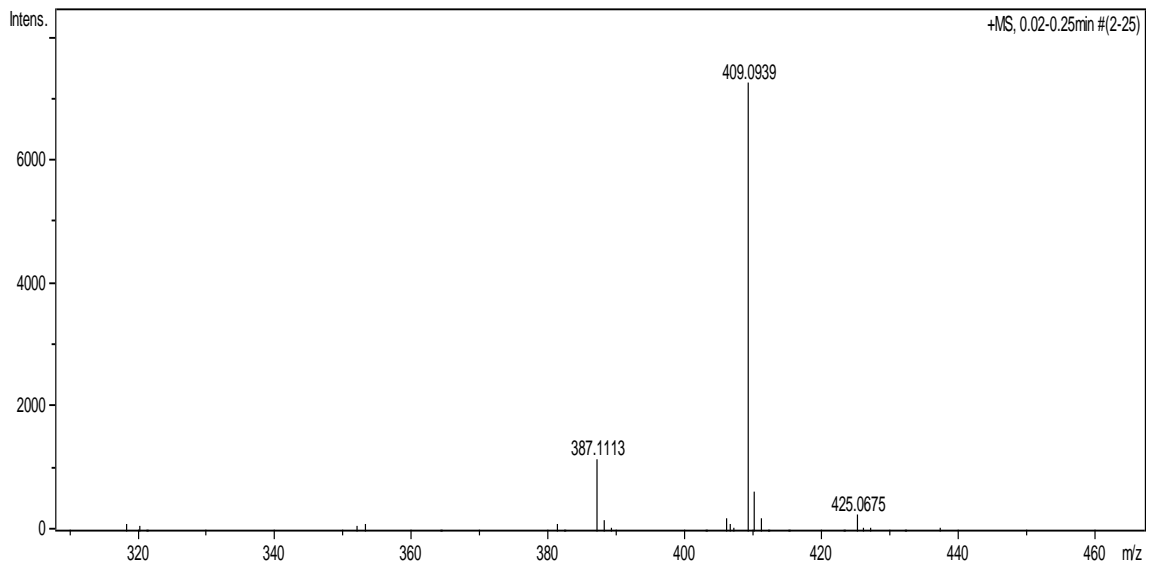

**ethyl ((5-amino-4-cyano-3-(4-methoxyphenyl)thiophene-2-carbonyl)carbamoyl)alaninate**

**(3h)**: yellow solid, 68%, m.p. 186-188°C; <sup>1</sup>H NMR (400 MHz, DMSO-*d*<sub>6</sub>) δ: 8.51 (d, *J* = 7.2 Hz, 1H, NH), 8.13 (s, 3H, NH, NH<sub>2</sub>), 7.38 (d, *J* = 8.4 Hz, 2H, ArH), 7.09 (d, *J* = 8.4 Hz, 2H, ArH), 4.24-4.20 (m, 1H, CH), 4.12-4.07 (m, 2H, CH), 3.83 (s, 3H, OCH<sub>3</sub>), 1.30 (d, *J* = 7.2 Hz, 3H, CH<sub>3</sub>), 1.17 (t, *J* = 7.2 Hz, 3H, CH<sub>3</sub>); <sup>13</sup>C NMR (100 MHz, DMSO-*d*<sub>6</sub>) δ: 172.4, 167.5, 161.9, 160.5, 152.0, 146.1, 131.0, 130.6, 124.5, 115.3, 111.8, 89.5, 61.2, 55.8, 48.7, 17.8, 14.2; IR (KBr) ν: 3377, 3286, 3172, 2938, 2215, 1740, 1687, 1653, 1514, 1476, 1415, 1320, 1255, 1210, 1177, 1095, 1019, 845 cm<sup>-1</sup>; MS (*m/z*): HRMS (ESI) Calcd. for C<sub>19</sub>H<sub>20</sub>N<sub>4</sub>O<sub>5</sub>S ([M+Na]<sup>+</sup>): 439.1154, found: 439.1048.

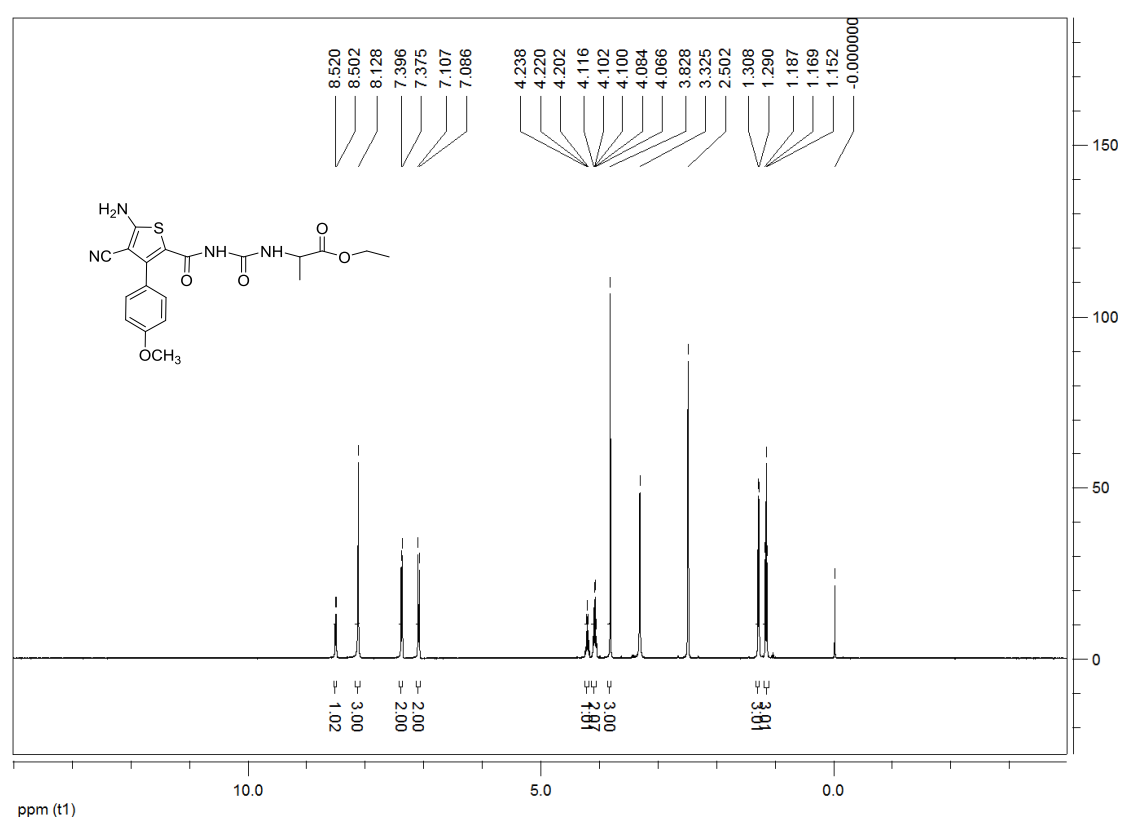

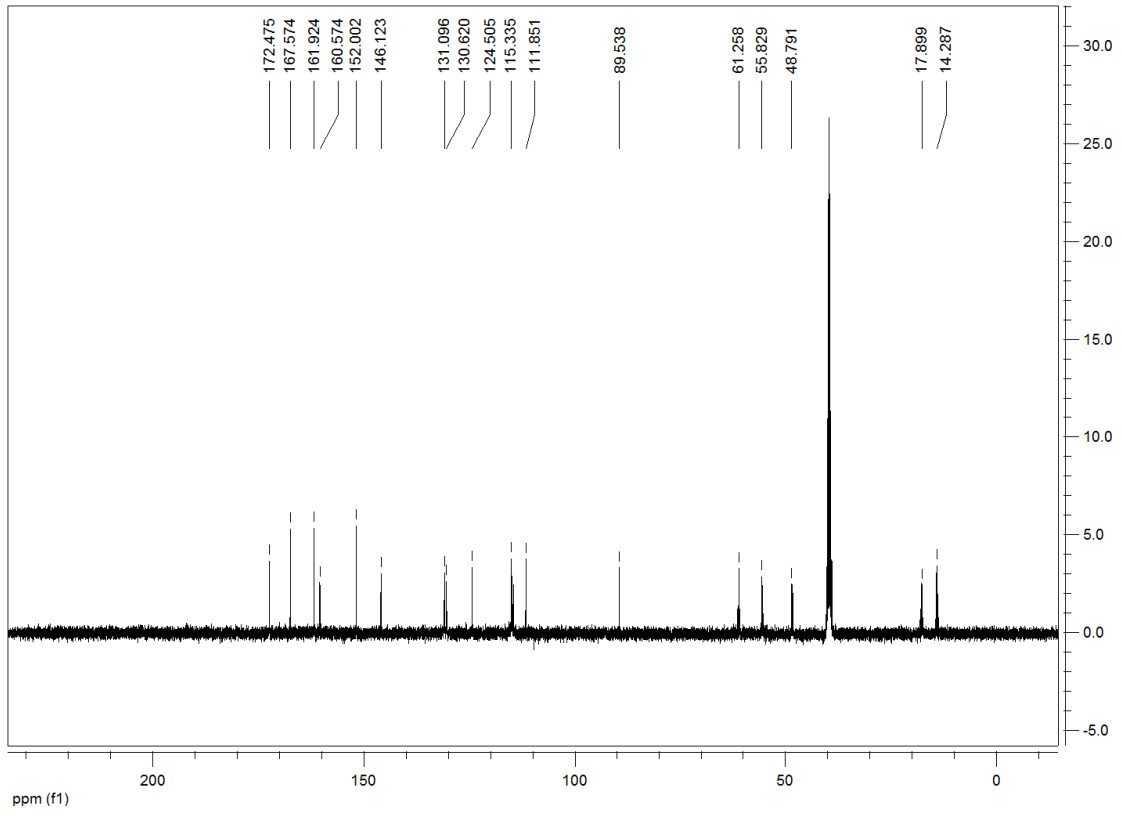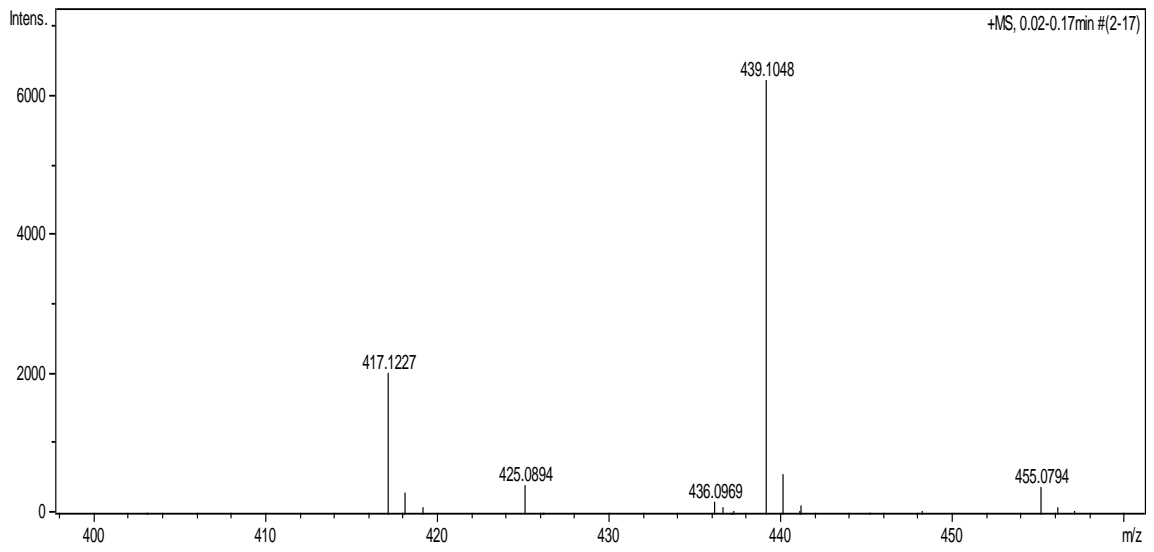



## Ethyl

### 2-(3-(5-amino-4-cyano-3-(4-methoxyphenyl)thiophene-2-carbonyl)ureido)-4-phenylbutanoate

**(3i)**: yellow solid, 58%, m.p. 180-182 °C;  $^1\text{H}$  NMR (400 MHz,  $\text{DMSO-}d_6$ )  $\delta$ : 8.58 (d,  $J = 7.2$  Hz, 1H, NH), 8.15 (s, 3H, NH,  $\text{NH}_2$ ), 7.40 (d,  $J = 8.4$  Hz, 2H, ArH), 7.29-7.25 (m, 2H, ArH), 7.20-7.16 (m, 3H, ArH), 7.09 (d,  $J = 8.4$  Hz, 2H, ArH), 4.23-4.18 (m, 1H, CH), 4.11-4.05 (m, 2H, CH), 3.82 (s, 3H,  $\text{OCH}_3$ ), 2.58-2.54 (m, 2H, CH), 2.04-1.94 (m, 2H, CH), 1.16 (t,  $J = 7.2$  Hz, 3H,  $\text{CH}_3$ );  $^{13}\text{C}$  NMR (100 MHz,  $\text{DMSO}d_6$ )  $\delta$ : 171.8, 167.6, 162.0, 160.6, 152.2, 146.0, 140.9, 130.8, 128.7, 128.7, 126.4, 124.4, 115.3, 114.9, 111.9, 89.5, 61.3, 55.7, 52.4, 33.3, 31.3, 14.4; IR (KBr)  $\nu$ : 3399, 3295, 3209, 2923, 2850, 2202 1702, 1687, 1641, 1504, 1476, 1478, 1311, 1262, 1223, 1178, 1088, 1029, 955, 873, 834  $\text{cm}^{-1}$ ; MS ( $m/z$ ): HRMS (ESI) Calcd. for  $\text{C}_{26}\text{H}_{26}\text{N}_4\text{NaO}_5\text{S}$  ( $[\text{M}+\text{Na}]^+$ ): 529.1516, found: 529.1526.

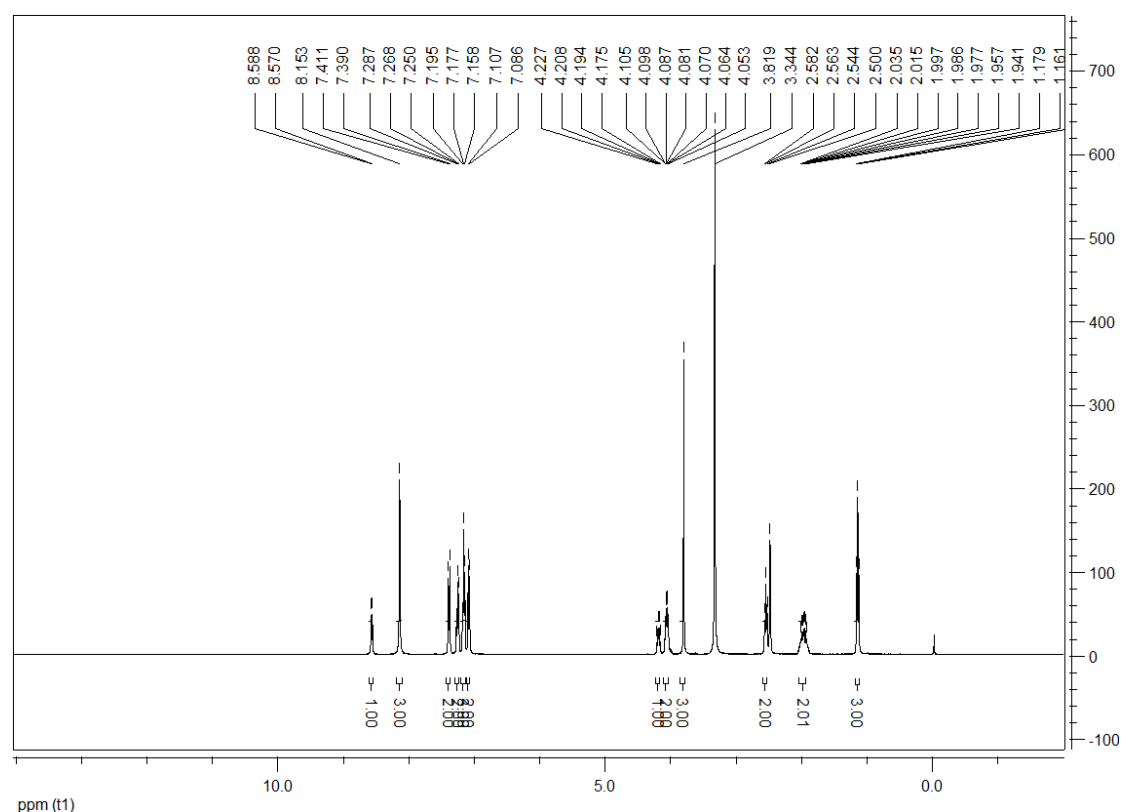

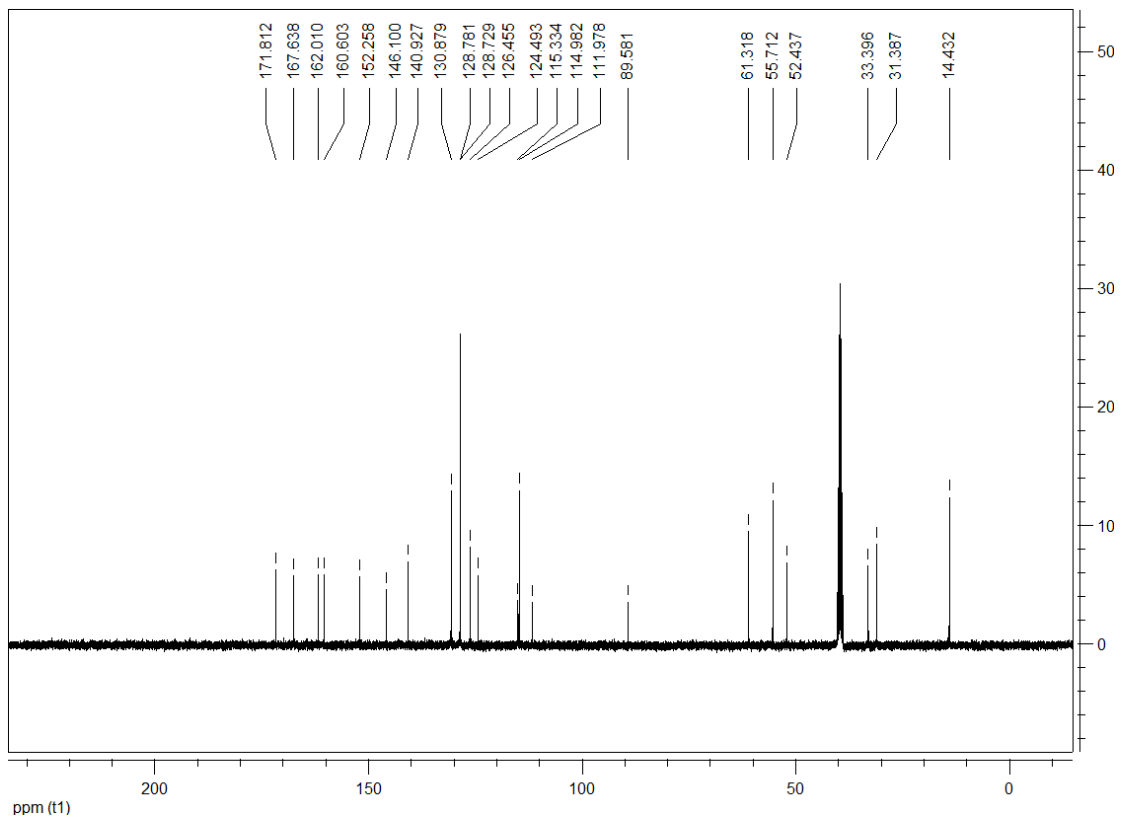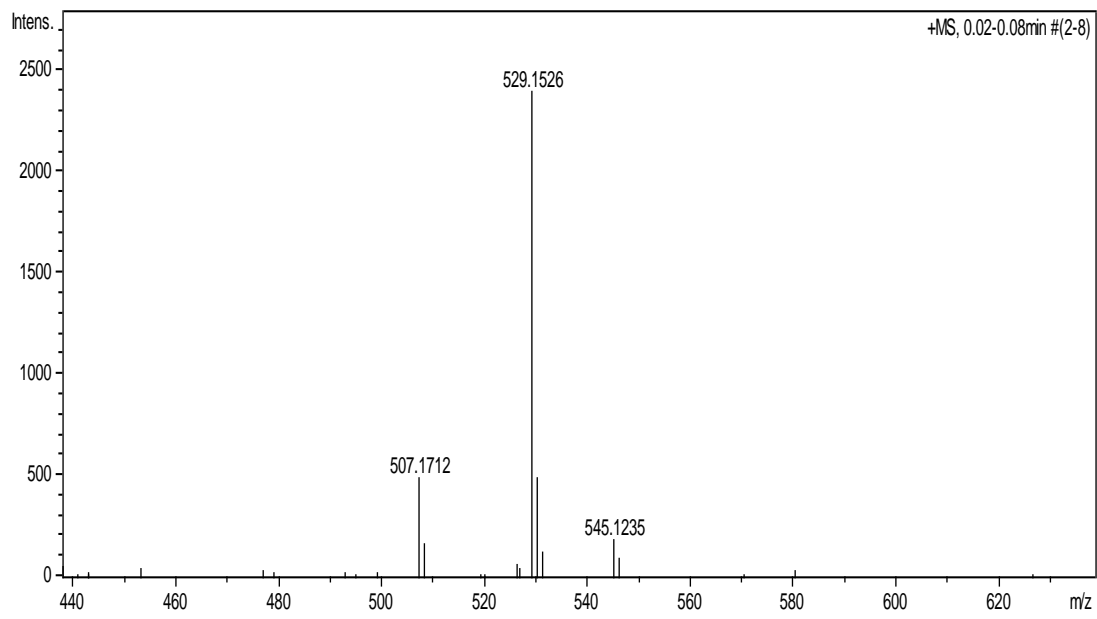



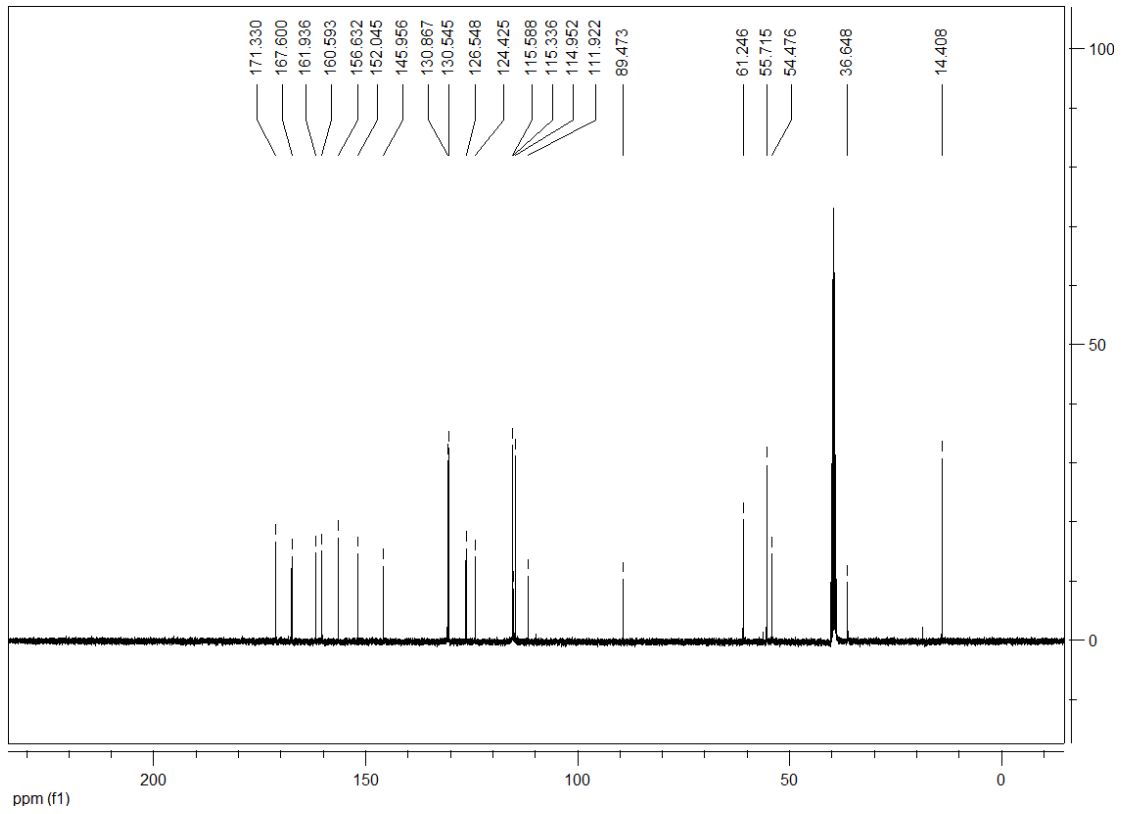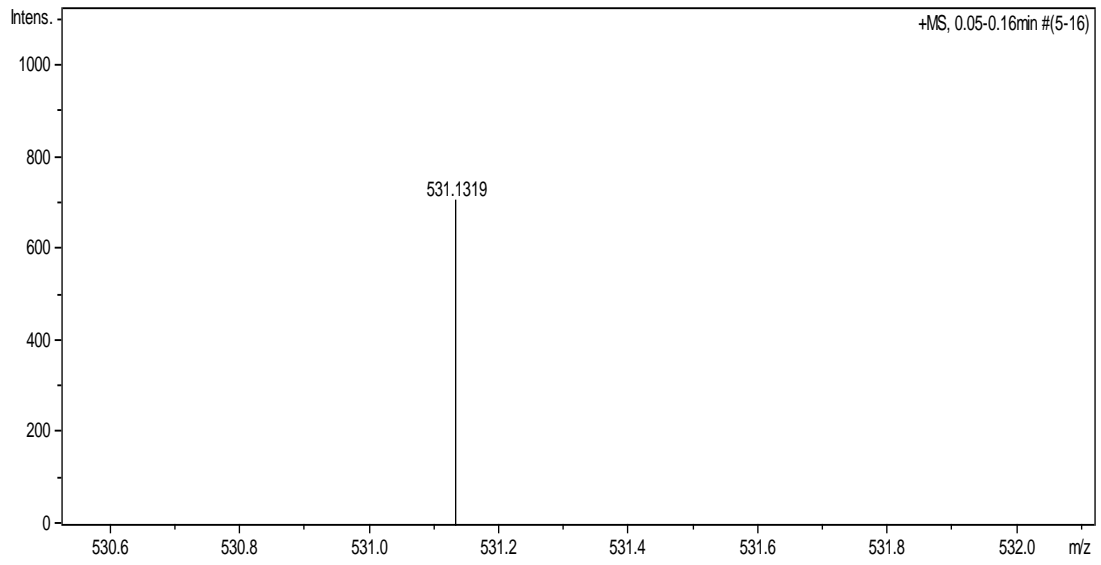

Supplement: c8ra03605e1.pdf [file c8ra03605e1.pdf]
